# Supplementary material
Source: publisher figshare collection journal article supplement (https://gsajournals.figshare.com/ndownloader/files/20276271)
Supplement: Supplementary file 1 [file 20276271]

## Sheet: Group I
FileS1.1. Significant differentially upregulated genes in Mop1 wildtype in response to ABA (606 DEGs).
Gene_id_v4	log2FC	log2CPM	F	PValue	FDR
Zm00001d047261	11.4643	2.38322	24.8644	0.000569636	0.0268914
MSTRG.7882	8.31862	2.3312	154.477	6.5e-07	0.000937069
Zm00001d002952	8.14863	1.87472	56.1983	2.22e-05	0.00473976
Zm00001d040113	8.08875	-0.621285	25.7096	0.00101256	0.036503
Zm00001d036637	8.04089	-0.625579	24.9664	0.00056119	0.0267598
MSTRG.18296	7.92913	-0.350922	42.5564	7.1e-05	0.00956336
MSTRG.13594	7.85545	-0.72395	29.6996	0.000293772	0.0193385
Zm00001d033612	7.69057	-1.00714	58.1287	1.93e-05	0.00444083
Zm00001d009718	7.64262	1.29821	29.5275	0.000214306	0.016825
Zm00001d022376	7.63583	-1.37048	32.4142	0.000485213	0.0251344
Zm00001d032610	7.57243	-1.26023	18.6484	0.00156232	0.0463646
Zm00001d048694	7.50265	4.69899	48.3128	2.57e-05	0.00517065
MSTRG.7958	7.32867	3.71866	91.8818	1.23e-06	0.00105977
MSTRG.30639	6.83097	-1.56352	27.5853	0.000812508	0.0323527
MSTRG.29045	6.67354	-0.998922	24.4891	0.000602052	0.0275952
MSTRG.12921	6.47987	1.3409	99.8845	8.17e-07	0.000992563
MSTRG.20419	6.20587	1.81537	64.5654	6.74e-06	0.00264956
MSTRG.27582	6.00821	-1.26011	22.469	0.000820185	0.0325458
Zm00001d049987	5.81488	0.00710313	17.1639	0.00167626	0.0481897
Zm00001d007876	5.79466	-0.620827	35.8617	9.52e-05	0.0109777
Zm00001d052537	5.65941	1.06046	24.1103	0.000480005	0.0250805
MSTRG.20417	5.5328	2.12895	79.182	2.54e-06	0.00160377
MSTRG.1507	5.52711	3.27547	74.6956	3.37e-06	0.00199104
MSTRG.21895	5.18881	1.14161	29.033	0.000229572	0.0172769
Zm00001d047259	5.09131	3.70517	71.6054	4.12e-06	0.00233982
MSTRG.14064	4.98276	0.693843	52.9622	1.69e-05	0.00410311
MSTRG.23310	4.9391	0.745175	22.1583	0.000663002	0.0288066
MSTRG.27907	4.91195	-0.939119	21.4481	0.0007494	0.030904
Zm00001d013494	4.83604	1.50201	46.0128	3.2e-05	0.00582945
Zm00001d050055	4.82071	5.3995	64.279	6.88e-06	0.00264956
Zm00001d033447	4.62993	4.87206	80.103	2.41e-06	0.00158713
Zm00001d035505	4.48048	-0.173692	27.8249	0.000272628	0.0187178
MSTRG.3049	4.33993	0.73885	22.122	0.000667119	0.028863
Zm00001d037730	4.33608	0.585127	21.6861	0.000719029	0.0303576
MSTRG.21642	4.27691	0.375188	18.8782	0.00119691	0.0399514
Zm00001d027258	4.27114	3.25977	68.2577	5.18e-06	0.00255518
Zm00001d032138	3.94885	5.18488	151.547	1.01e-07	0.000397944
Zm00001d052064	3.94654	2.3947	87.6715	1.55e-06	0.00120736
Zm00001d008983	3.89719	5.11593	96.1086	9.88e-07	0.000992563
Zm00001d022349	3.8209	-0.28213	16.8091	0.00180221	0.0498851
Zm00001d043709	3.7871	5.63179	53.0685	1.68e-05	0.00410063
Zm00001d047060	3.76556	3.73468	48.7633	2.46e-05	0.00510309
Zm00001d018191	3.73689	4.02039	39.8107	6.07e-05	0.00860492
Zm00001d017453	3.72996	1.49306	44.4953	3.72e-05	0.00637645
Zm00001d004171	3.70234	0.141648	31.6448	0.00016115	0.0140682
Zm00001d004442	3.63921	1.87251	65.9922	6.08e-06	0.00258325
Zm00001d005748	3.58723	3.64948	58.2667	1.09e-05	0.00318603
Zm00001d044142	3.50785	5.41804	148.307	1.12e-07	0.000397944
Zm00001d016255	3.50176	6.19998	66.524	5.85e-06	0.00258325
Zm00001d013903	3.47984	3.6048	95.186	1.04e-06	0.000992563
Zm00001d025055	3.46839	6.06207	51.4953	1.92e-05	0.00444083
Zm00001d003760	3.43538	5.86173	150.307	1.05e-07	0.000397944
Zm00001d025018	3.40311	2.98795	17.8462	0.00146221	0.0449806
Zm00001d023443	3.38364	3.36257	136.718	1.7e-07	0.000481339
Zm00001d019446	3.30084	1.35422	24.6385	0.000441264	0.024169
MSTRG.27152	3.27548	-1.10575	16.8333	0.00179327	0.0497348
Zm00001d009140	3.26146	1.20522	29.4339	0.000217103	0.0169191
Zm00001d020332	3.25169	4.37162	115.319	4e-07	0.000630229
Zm00001d051048	3.21888	0.812511	37.2468	8.09e-05	0.0101193
MSTRG.7969	3.19686	6.43478	25.6147	0.000378984	0.0221563
Zm00001d017422	3.19599	4.303	130.519	2.15e-07	0.000507232
Zm00001d002940	3.16216	4.30729	68.1353	5.22e-06	0.00255518
Zm00001d020717	3.14169	7.8325	91.7348	1.24e-06	0.00105977
Zm00001d008872	3.13541	0.304195	27.7013	0.000277549	0.0188388
Zm00001d029274	3.12933	1.89029	27.8524	0.000271546	0.0186998
Zm00001d048991	3.09175	3.78823	20.8019	0.00083984	0.03298
Zm00001d037894	3.0664	10.7189	50.8627	2.04e-05	0.00451131
MSTRG.21985	3.06586	2.32255	101.154	7.68e-07	0.00099002
Zm00001d009399	3.044	2.29472	61.5642	8.43e-06	0.0028683
MSTRG.23706	3.02711	1.49101	19.4311	0.00107842	0.0377799
Zm00001d039735	3.0112	1.26645	37.6424	7.73e-05	0.00988184
MSTRG.7968	2.99623	7.6788	30.5032	0.000187573	0.0155155
Zm00001d038911	2.95983	4.92045	244.46	8.5e-09	0.000241118
MSTRG.8542	2.94818	0.144873	27.5327	0.000284438	0.0190663
Zm00001d044078	2.91834	3.82521	94.9434	1.05e-06	0.000992563
Zm00001d002899	2.89769	6.01575	70.3103	4.5e-06	0.00245446
Zm00001d014617	2.87629	11.7447	62.9688	7.58e-06	0.00271835
Zm00001d022524	2.84264	2.38606	55.1657	1.4e-05	0.00368573
Zm00001d001996	2.82651	3.53954	42.6321	4.49e-05	0.00728258
Zm00001d030498	2.82156	1.01597	43.9153	3.94e-05	0.00653594
MSTRG.11979	2.81969	2.21236	42.7865	4.42e-05	0.00720846
Zm00001d043730	2.78264	1.10346	32.4323	0.000145478	0.0134886
Zm00001d046281	2.77731	3.34051	123.763	2.8e-07	0.000575194
Zm00001d006813	2.74374	1.07041	24.0365	0.000485736	0.0251344
Zm00001d031749	2.74352	6.47785	104.268	6.61e-07	0.000937069
Zm00001d022211	2.73908	1.91882	41.9694	4.81e-05	0.00760023
Zm00001d045321	2.7384	5.51173	19.7488	0.00101662	0.036511
Zm00001d007395	2.73745	1.19921	29.3809	0.000218702	0.0169191
Zm00001d040613	2.7229	3.163	96.2988	9.79e-07	0.000992563
Zm00001d045988	2.71469	0.875936	22.7779	0.000597133	0.0275477
Zm00001d002744	2.69946	2.63217	64.2185	6.91e-06	0.00264956
Zm00001d042886	2.69186	6.63077	150.489	1.04e-07	0.000397944
Zm00001d019925	2.6744	2.41955	21.3189	0.000766519	0.0312916
Zm00001d006713	2.67336	-0.506997	22.2289	0.000655067	0.0287153
Zm00001d036683	2.66853	0.273753	28.3381	0.00025326	0.0180678
Zm00001d047547	2.66283	2.63173	63.0968	7.51e-06	0.00271835
Zm00001d025229	2.63577	1.99988	26.8808	0.000313046	0.0199142
Zm00001d033231	2.60374	5.66612	174.632	4.86e-08	0.000397944
MSTRG.4857	2.60232	0.746401	22.7559	0.000599328	0.0275726
Zm00001d032519	2.59277	4.13004	24.2712	0.000467795	0.0247805
Zm00001d032253	2.57418	3.07614	53.272	1.65e-05	0.00406436
Zm00001d014055	2.54231	3.83578	68.3724	5.14e-06	0.00255518
Zm00001d045883	2.53044	-0.0752905	20.6934	0.000856261	0.0333826
Zm00001d028092	2.52408	1.73937	41.3403	5.14e-05	0.00764892
Zm00001d022069	2.51557	6.45131	159.547	7.73e-08	0.000397944
Zm00001d053815	2.51432	2.90732	29.3701	0.000219032	0.0169191
Zm00001d033943	2.50166	4.01083	22.6033	0.000614871	0.0277146
Zm00001d007606	2.49238	2.60428	46.916	2.93e-05	0.00565991
Zm00001d004624	2.47917	3.08735	95.9827	9.95e-07	0.000992563
Zm00001d010380	2.47429	7.89494	86.6534	1.64e-06	0.00120736
Zm00001d037724	2.46956	5.56498	35.3641	0.00010102	0.0114189
Zm00001d052963	2.46488	2.06356	44.6501	3.66e-05	0.00636914
Zm00001d053195	2.45795	3.53498	33.8172	0.00012208	0.0125042
Zm00001d017065	2.43048	4.39269	91.3283	1.27e-06	0.00105977
Zm00001d029835	2.42341	2.26896	79.6043	2.48e-06	0.0015986
Zm00001d020620	2.42334	2.10661	19.8178	0.00100378	0.0362331
Zm00001d044864	2.41327	6.14059	24.5779	0.00044552	0.0242649
Zm00001d018751	2.39177	1.47167	28.8677	0.00023496	0.017451
Zm00001d042898	2.38564	5.03858	120.213	3.25e-07	0.000575194
Zm00001d033369	2.37651	3.39944	69.95	4.61e-06	0.00246779
Zm00001d022944	2.36606	0.588783	17.0198	0.00172612	0.0487594
Zm00001d040979	2.36374	8.03091	55.59	1.35e-05	0.00362489
Zm00001d028574	2.34384	8.12159	37.9357	7.48e-05	0.00973186
Zm00001d049926	2.30935	3.9745	61.1528	8.69e-06	0.0028683
Zm00001d048142	2.30498	3.8323	35.5716	9.85e-05	0.0112276
Zm00001d039919	2.28958	2.3319	56.3991	1.27e-05	0.00355866
zma	2.28399	3.05565	66.3818	5.91e-06	0.00258325
Zm00001d029366	2.27677	5.44073	17.2802	0.00163728	0.0475261
MSTRG.1656	2.26949	1.2177	25.9716	0.000358857	0.0215624
Zm00001d036280	2.26916	3.23936	24.2035	0.000472891	0.0248921
Zm00001d013281	2.261	1.63261	21.2322	0.00077827	0.0314994
Zm00001d047260	2.25325	6.30346	65.7324	6.19e-06	0.00258325
Zm00001d012401	2.23657	5.47919	72.8857	3.79e-06	0.00219365
Zm00001d035079	2.22828	2.6259	34.8328	0.000107729	0.011893
Zm00001d014744	2.22705	6.40471	51.2533	1.97e-05	0.00446142
Zm00001d041656	2.22571	2.0561	20.8555	0.00083186	0.0327536
Zm00001d023800	2.22123	6.98418	66.088	6.04e-06	0.00258325
Zm00001d032144	2.21938	2.43635	24.8195	0.00042885	0.0238251
MSTRG.25969	2.21409	0.283539	18.9154	0.00118848	0.039737
Zm00001d029934	2.21002	3.37103	149.95	1.06e-07	0.000397944
Zm00001d009382	2.20825	0.899514	20.0352	0.000964503	0.0353131
Zm00001d011132	2.20783	6.51819	50.2488	2.15e-05	0.00468808
Zm00001d036499	2.20508	4.60936	18.5851	0.00126599	0.041381
Zm00001d043734	2.18784	2.79199	67.675	5.39e-06	0.00258325
Zm00001d011495	2.18432	2.46642	32.1024	0.000151813	0.013769
Zm00001d029091	2.17039	6.38772	40.1115	5.87e-05	0.00841113
Zm00001d008173	2.15904	3.96835	35.0957	0.000104346	0.0116098
Zm00001d037453	2.14816	6.0199	62.4359	7.89e-06	0.00276305
Zm00001d006193	2.12598	4.07201	29.125	0.000226636	0.0171469
Zm00001d032116	2.12199	0.483613	28.924	0.000233109	0.017359
Zm00001d010499	2.11223	2.90159	33.6511	0.000124639	0.012643
Zm00001d008208	2.11095	3.92804	34.4314	0.000113149	0.0121132
Zm00001d017989	2.10159	3.92881	44.3342	3.78e-05	0.00637791
Zm00001d000691	2.09412	3.80607	123.367	2.85e-07	0.000575194
Zm00001d025964	2.08526	6.20414	18.1666	0.00137298	0.0432987
Zm00001d037769	2.08248	6.99463	41.4963	5.06e-05	0.00764892
Zm00001d036533	2.08021	4.804	19.8286	0.00100178	0.0362069
Zm00001d012867	2.05478	2.91976	16.842	0.00179008	0.0496948
Zm00001d044301	2.04651	6.17393	18.4359	0.00130295	0.0421663
Zm00001d031848	2.04392	0.960887	19.5921	0.00104657	0.0372097
Zm00001d028120	2.04056	0.871444	28.9798	0.000231289	0.0173269
Zm00001d003757	2.03446	7.09739	39.1217	6.54e-05	0.00914678
Zm00001d044124	2.01818	2.71761	17.162	0.00167692	0.0481897
Zm00001d003272	2.00759	1.22275	33.5935	0.000125541	0.012643
Zm00001d047994	2.00412	5.10106	86.7797	1.63e-06	0.00120736
Zm00001d042862	2.00323	6.83472	77.526	2.82e-06	0.00173735
MSTRG.904	2.00218	0.647091	21.4035	0.000755252	0.0309653
Zm00001d029654	1.99081	4.21089	36.9364	8.39e-05	0.0103027
Zm00001d009626	1.98962	6.15532	68.5395	5.08e-06	0.00255518
Zm00001d043180	1.98841	1.41631	17.5474	0.00155169	0.0461958
Zm00001d018178	1.98038	5.51177	76.5212	3e-06	0.00181063
Zm00001d027755	1.96672	4.48569	118.789	3.45e-07	0.000575194
Zm00001d038846	1.96258	6.79856	36.1295	9.22e-05	0.0108018
Zm00001d033273	1.9519	4.84381	18.1588	0.00137508	0.0432987
Zm00001d029988	1.94773	3.6988	34.142	0.000117257	0.0122761
Zm00001d001936	1.94101	2.56931	23.1843	0.000558135	0.0267039
Zm00001d020711	1.94089	4.39207	19.5249	0.00105971	0.0375358
Zm00001d021573	1.92747	3.22673	29.8308	0.000205541	0.0164898
Zm00001d051596	1.91801	1.2864	23.8593	0.000499824	0.0252781
Zm00001d012068	1.90794	2.87302	27.0894	0.000303537	0.0196172
Zm00001d044748	1.90202	1.82672	32.7164	0.000140272	0.0130915
Zm00001d042148	1.90091	4.04281	51.3261	1.95e-05	0.00446142
Zm00001d051415	1.89165	2.14795	46.1746	3.15e-05	0.00582945
Zm00001d027332	1.88258	8.25963	24.577	0.000445581	0.0242649
Zm00001d053293	1.8765	1.73328	41.33	5.15e-05	0.00764892
Zm00001d038695	1.8739	3.63414	30.6409	0.000184128	0.0155155
Zm00001d013212	1.87104	3.59969	37.009	8.32e-05	0.0103027
Zm00001d038913	1.87086	7.59753	38.8132	6.77e-05	0.00932869
Zm00001d017762	1.85565	5.93466	45.9999	3.2e-05	0.00582945
Zm00001d051424	1.85483	2.3404	28.7666	0.000238329	0.0175633
Zm00001d005609	1.84922	6.09069	44.1211	3.86e-05	0.00647743
Zm00001d010652	1.84774	4.43757	65.3434	6.37e-06	0.00261093
Zm00001d022245	1.84496	2.95862	17.9682	0.00142744	0.044279
Zm00001d051938	1.83818	1.91107	25.963	0.000359326	0.0215624
Zm00001d035000	1.82624	3.6914	46.4938	3.05e-05	0.00581513
Zm00001d038358	1.82588	3.28604	45.9986	3.2e-05	0.00582945
Zm00001d050308	1.82388	2.62688	20.0689	0.000958583	0.0353131
Zm00001d043549	1.82009	2.07613	25.8863	0.000363548	0.0217149
Zm00001d017968	1.81957	2.95784	28.0826	0.000262689	0.0182382
Zm00001d027256	1.81735	1.23914	33.2532	0.000131028	0.012775
Zm00001d027370	1.81565	4.24944	33.4939	0.000127118	0.012643
Zm00001d023404	1.81147	1.64288	17.4193	0.00159205	0.0468078
Zm00001d023522	1.80991	3.86116	31.0696	0.000173869	0.0149034
Zm00001d014089	1.80807	0.862211	25.0788	0.000411776	0.0232727
Zm00001d004506	1.79842	3.98445	24.1817	0.000474546	0.024933
Zm00001d012313	1.79279	5.46277	41.6758	4.96e-05	0.00764892
Zm00001d026670	1.79093	1.55899	29.5304	0.000214221	0.016825
Zm00001d039975	1.78773	3.82414	96.7446	9.57e-07	0.000992563
Zm00001d018699	1.78612	3.20081	86.4644	1.66e-06	0.00120736
Zm00001d043596	1.7859	1.89505	24.2548	0.000469023	0.0247805
Zm00001d016570	1.78497	2.00992	30.8062	0.000180089	0.0153438
Zm00001d011202	1.77385	5.4853	57.9911	1.11e-05	0.00322373
MSTRG.15919	1.772	0.70912	28.5247	0.000246624	0.0179718
Zm00001d037610	1.75862	4.35154	41.5217	5.05e-05	0.00764892
Zm00001d045204	1.75826	5.05537	48.5565	2.51e-05	0.00512719
Zm00001d026414	1.75038	5.25526	49.5008	2.3e-05	0.00483855
Zm00001d019163	1.7486	12.2416	18.1345	0.00138162	0.0433621
Zm00001d007285	1.74609	3.42121	16.962	0.00174661	0.0490949
Zm00001d030086	1.74406	4.28974	27.4971	0.000285916	0.0190871
Zm00001d052947	1.74359	2.39761	61.2646	8.62e-06	0.0028683
Zm00001d039065	1.73638	4.69135	34.6551	0.00011009	0.0120133
Zm00001d012591	1.7333	6.11427	65.1827	6.44e-06	0.00261093
Zm00001d051908	1.73253	8.26021	53.7682	1.58e-05	0.00392927
Zm00001d042637	1.72245	3.70966	59.7871	9.66e-06	0.00304444
Zm00001d043733	1.72109	1.64368	17.9725	0.00142624	0.044279
Zm00001d049218	1.71575	1.47234	36.9415	8.38e-05	0.0103027
Zm00001d053049	1.70349	5.11486	63.4811	7.3e-06	0.00270465
Zm00001d049660	1.69777	4.3951	82.2976	2.11e-06	0.00142552
Zm00001d029829	1.68663	2.04744	17.4368	0.00158644	0.0467626
MSTRG.26172	1.68247	1.1746	21.5076	0.000741669	0.0307833
Zm00001d051194	1.67179	9.92188	23.817	0.000503265	0.0253713
Zm00001d026635	1.67087	2.44489	23.9945	0.00048903	0.0251344
Zm00001d047685	1.67007	6.85283	50.6335	2.08e-05	0.00456931
Zm00001d043601	1.66583	6.91605	66.551	5.84e-06	0.00258325
Zm00001d030550	1.65852	3.59109	30.6365	0.000184237	0.0155155
Zm00001d019629	1.64895	8.56656	36.1013	9.25e-05	0.0108018
Zm00001d020133	1.64442	4.8565	119.102	3.4e-07	0.000575194
Zm00001d007469	1.64019	3.56979	58.4636	1.07e-05	0.00318603
Zm00001d022571	1.63876	3.25761	47.184	2.86e-05	0.00563184
Zm00001d027894	1.63667	3.72505	29.5736	0.000212946	0.016825
Zm00001d030343	1.63193	3.00895	17.9316	0.00143776	0.044436
Zm00001d011269	1.62621	5.02421	88.2843	1.5e-06	0.00120736
Zm00001d008869	1.60969	4.23246	22.5762	0.000617682	0.0277732
Zm00001d023529	1.60918	10.9617	31.5916	0.000162278	0.014083
Zm00001d025360	1.60163	6.59933	21.0698	0.000800848	0.0321381
Zm00001d015977	1.5945	2.76954	27.2051	0.000298407	0.0194184
Zm00001d007820	1.59154	4.83149	28.4166	0.000250442	0.0180344
Zm00001d047814	1.58929	5.57468	60.6422	9.04e-06	0.0029152
Zm00001d007420	1.5854	3.27563	20.1231	0.000949147	0.0351012
Zm00001d037768	1.58457	3.75898	39.6375	6.18e-05	0.00872626
MSTRG.20605	1.57968	2.12111	23.4822	0.000531456	0.0261101
Zm00001d014467	1.57619	7.59171	23.5303	0.000527291	0.0261087
Zm00001d038526	1.5756	2.9552	43.953	3.92e-05	0.00653594
Zm00001d004564	1.57321	7.17199	34.4518	0.000112865	0.0121132
Zm00001d035134	1.5587	4.71151	33.4761	0.000127402	0.012643
Zm00001d039148	1.558	3.53918	36.4564	8.87e-05	0.010659
Zm00001d042274	1.55078	6.02403	63.9441	7.05e-06	0.00266748
Zm00001d022456	1.54436	7.18224	22.2512	0.000652587	0.0287057
Zm00001d044120	1.54422	2.40974	23.9279	0.000494319	0.0251792
Zm00001d050347	1.53979	3.85721	56.1499	1.29e-05	0.00356173
Zm00001d027987	1.53501	4.79775	17.1605	0.00167741	0.0481897
Zm00001d052268	1.53457	4.86045	41.4404	5.09e-05	0.00764892
Zm00001d040190	1.52663	9.5132	56.6504	1.24e-05	0.00352107
Zm00001d000002	1.52493	3.51671	33.4723	0.000127462	0.012643
Zm00001d014481	1.52166	1.90631	21.6175	0.000727636	0.0306298
Zm00001d034027	1.52099	3.81534	34.5369	0.000111694	0.0121132
Zm00001d033929	1.51374	5.42485	33.3829	0.000128903	0.012643
Zm00001d025859	1.50677	4.33689	58.7859	1.05e-05	0.00315874
Zm00001d005037	1.49784	4.15399	18.0347	0.00140891	0.0440723
Zm00001d026072	1.49314	1.89757	19.1102	0.0011454	0.0390123
Zm00001d053006	1.49283	2.86016	17.1927	0.00166652	0.0481491
Zm00001d003287	1.49068	1.59128	33.1971	0.000131959	0.0128217
Zm00001d016764	1.49034	3.18441	36.684	8.64e-05	0.0105192
Zm00001d020828	1.49017	5.48335	102.736	7.11e-07	0.000960449
Zm00001d017918	1.48643	1.99161	17.4978	0.00156717	0.0463646
Zm00001d021059	1.485	2.83227	23.5586	0.000524861	0.0260794
Zm00001d048185	1.48106	3.4916	25.5521	0.000382651	0.0221563
Zm00001d047290	1.47789	5.49239	36.2102	9.13e-05	0.0107521
Zm00001d048695	1.47758	3.11727	56.9598	1.21e-05	0.00346809
Zm00001d024762	1.4756	5.76394	49.8081	2.24e-05	0.00473976
Zm00001d018122	1.47504	4.70451	30.368	0.000191031	0.0155947
Zm00001d012069	1.46888	5.84753	32.189	0.000150118	0.0137505
Zm00001d025580	1.46683	2.46568	21.43	0.000751772	0.030912
Zm00001d043263	1.4665	1.1305	17.9571	0.00143056	0.044279
Zm00001d042940	1.4654	2.87871	23.3026	0.000547352	0.0264557
Zm00001d035166	1.46517	3.99884	34.4417	0.000113005	0.0121132
Zm00001d046644	1.46495	2.17039	39.0079	6.63e-05	0.00921782
Zm00001d041191	1.46068	5.09302	45.5006	3.36e-05	0.00604036
Zm00001d035495	1.46008	1.83706	23.8146	0.000503455	0.0253713
Zm00001d012391	1.45766	4.18131	31.831	0.000157271	0.0139877
Zm00001d043361	1.45674	3.28439	24.6547	0.000440134	0.0241538
MSTRG.14673	1.45117	1.42048	19.1687	0.00113282	0.038817
Zm00001d048201	1.44786	6.28222	32.8009	0.000138769	0.0130369
Zm00001d023168	1.44042	3.6137	21.5092	0.000741457	0.0307833
Zm00001d009503	1.44018	3.33337	31.1506	0.000172008	0.0147885
Zm00001d048962	1.43311	5.07192	33.6107	0.000125269	0.012643
Zm00001d043536	1.43232	6.51181	39.9277	5.99e-05	0.00853827
Zm00001d032079	1.4286	4.63238	28.8402	0.000235872	0.017473
Zm00001d017383	1.42859	3.2584	30.9347	0.000177023	0.015128
Zm00001d008199	1.42563	2.66983	26.2116	0.000346034	0.020978
Zm00001d051584	1.42514	4.81727	93.3381	1.14e-06	0.00104456
Zm00001d047765	1.4238	6.54543	39.4796	6.29e-05	0.00883527
Zm00001d042013	1.41608	3.24221	18.8401	0.00120563	0.0401011
Zm00001d020811	1.41512	2.6748	28.2555	0.000256262	0.0181166
Zm00001d020408	1.41317	2.36204	17.398	0.00159888	0.0469601
Zm00001d048925	1.40746	5.77048	34.2518	0.000115679	0.0121746
Zm00001d033931	1.40741	7.38776	28.7338	0.000239435	0.0175991
Zm00001d020612	1.40653	3.64042	38.3362	7.15e-05	0.00956336
Zm00001d015289	1.40577	3.49291	22.0931	0.000670416	0.028863
Zm00001d015356	1.4047	8.26162	23.8735	0.000498682	0.0252654
Zm00001d047981	1.40372	4.09508	16.8566	0.0017847	0.049594
Zm00001d006688	1.4028	7.70196	44.3427	3.77e-05	0.00637791
Zm00001d031203	1.39447	7.59315	18.413	0.00130874	0.0421663
Zm00001d049640	1.39177	2.67162	19.6473	0.0010359	0.0370008
Zm00001d034558	1.38948	8.11587	37.2422	8.1e-05	0.0101193
Zm00001d012159	1.38591	3.03305	20.2832	0.000921912	0.034561
Zm00001d026126	1.38463	2.70572	23.4352	0.000535563	0.0261101
Zm00001d038730	1.38078	2.04671	22.4824	0.000627526	0.028038
Zm00001d026131	1.3798	1.86057	34.4916	0.000112316	0.0121132
Zm00001d026447	1.37963	6.54443	23.7886	0.000505586	0.0254335
Zm00001d010586	1.37515	4.48761	17.2405	0.00165045	0.047752
Zm00001d030577	1.37035	1.38407	18.1967	0.00136495	0.043172
Zm00001d039492	1.36822	6.15796	29.3139	0.000220749	0.0169191
Zm00001d000224	1.36391	5.60407	25.0244	0.000415291	0.0234247
Zm00001d043992	1.36388	1.97931	22.6139	0.000613776	0.0277146
Zm00001d042207	1.35626	2.90518	16.8122	0.00180107	0.0498851
Zm00001d029975	1.35585	3.84428	46.9195	2.93e-05	0.00565991
Zm00001d006158	1.35523	5.19823	54.1949	1.52e-05	0.00385677
Zm00001d010410	1.35451	6.81973	26.2358	0.000344769	0.020946
Zm00001d047553	1.35025	5.07439	51.1352	1.99e-05	0.00447278
Zm00001d028778	1.34995	2.42945	45.9945	3.21e-05	0.00582945
Zm00001d009497	1.34994	2.76753	22.1598	0.000662831	0.0288066
Zm00001d004095	1.34864	3.19964	22.471	0.000628732	0.0280478
Zm00001d043612	1.34725	4.40247	32.9712	0.000135792	0.0128941
Zm00001d008919	1.3455	4.09617	30.582	0.000185592	0.0155155
Zm00001d020686	1.3453	6.19949	48.653	2.49e-05	0.00511826
Zm00001d037317	1.34462	1.51077	18.9868	0.00117246	0.0394602
Zm00001d000967	1.33948	4.1471	59.5116	9.87e-06	0.00304444
Zm00001d038146	1.33575	5.94815	30.4129	0.000189875	0.0155698
Zm00001d008311	1.33461	1.88419	22.2082	0.000657387	0.0287153
Zm00001d046952	1.3343	5.65745	34.0143	0.000119126	0.0123352
Zm00001d018677	1.33195	4.91843	22.3707	0.000639489	0.0282696
Zm00001d036700	1.33149	4.28415	20.7793	0.000843235	0.0330154
Zm00001d030851	1.33028	5.04774	40.5148	5.62e-05	0.00817533
Zm00001d007097	1.32815	7.19561	41.5977	5.01e-05	0.00764892
Zm00001d048789	1.32324	5.0896	24.2696	0.000467913	0.0247805
Zm00001d052660	1.31808	5.14316	47.6401	2.74e-05	0.00543102
Zm00001d027341	1.31724	3.14033	25.7926	0.000368789	0.0218897
Zm00001d027455	1.31654	5.47075	33.3799	0.000128951	0.012643
Zm00001d040807	1.31628	5.29846	19.2292	0.00111999	0.0386103
Zm00001d003213	1.31235	5.65541	22.6598	0.000609066	0.027631
Zm00001d044159	1.31084	5.56903	43.3461	4.17e-05	0.00688497
Zm00001d034978	1.31017	6.21181	30.5792	0.000185661	0.0155155
Zm00001d044109	1.30931	3.45981	28.2264	0.000257331	0.0181166
Zm00001d028692	1.29782	6.38682	28.5938	0.00024422	0.0178583
Zm00001d048521	1.29722	4.05975	30.5419	0.000186598	0.0155155
Zm00001d048868	1.29208	4.72251	26.9432	0.000310164	0.0198198
Zm00001d000500	1.29074	1.65588	19.0755	0.00115294	0.0391146
Zm00001d042826	1.28603	4.26012	18.9279	0.00118564	0.039737
Zm00001d038304	1.28518	4.48401	51.5359	1.92e-05	0.00444083
Zm00001d044045	1.27808	5.57544	41.8551	4.87e-05	0.00762177
Zm00001d020457	1.27651	3.74115	30.0291	0.000200037	0.0161694
Zm00001d020627	1.27529	4.99673	34.0513	0.000118581	0.0123308
Zm00001d020673	1.27512	3.8991	17.5907	0.00153834	0.0459914
Zm00001d020496	1.27331	6.1768	23.3807	0.000540373	0.0262525
Zm00001d020636	1.26487	9.12762	21.3871	0.000757427	0.0310097
Zm00001d007311	1.26047	3.52666	33.4056	0.000128535	0.012643
Zm00001d024572	1.25919	5.25095	27.7736	0.000274658	0.0187322
Zm00001d027520	1.25629	7.4842	19.9745	0.000975276	0.0355662
Zm00001d002020	1.25584	4.33048	48.4611	2.53e-05	0.005136
Zm00001d019254	1.25583	3.56187	22.1949	0.000658878	0.0287153
Zm00001d050323	1.25546	6.45764	26.2564	0.000343698	0.020946
Zm00001d049049	1.25159	3.84541	18.3581	0.00132275	0.0423438
Zm00001d012128	1.25104	2.64719	32.7263	0.000140096	0.0130915
Zm00001d006682	1.24898	5.23384	41.8202	4.89e-05	0.00762177
Zm00001d038991	1.24523	4.51505	29.2257	0.000223477	0.0169986
Zm00001d026253	1.24244	2.45761	29.4528	0.000216536	0.0169191
Zm00001d027593	1.24152	6.8929	22.1111	0.00066836	0.028863
Zm00001d014007	1.24049	4.07167	28.4246	0.000250159	0.0180344
Zm00001d023979	1.23777	3.43489	33.5517	0.000126199	0.012643
Zm00001d043205	1.23703	5.70155	41.9523	4.82e-05	0.00760023
Zm00001d039619	1.23567	3.23031	45.614	3.33e-05	0.00601162
Zm00001d046073	1.23453	3.7472	38.1257	7.32e-05	0.00969903
Zm00001d015239	1.23443	5.8198	30.1468	0.000196852	0.0159574
Zm00001d032461	1.23071	2.78703	22.5982	0.000615401	0.0277146
Zm00001d005898	1.23064	2.88121	23.2261	0.000554292	0.026639
Zm00001d040627	1.22747	2.26459	29.4046	0.000217987	0.0169191
Zm00001d013390	1.22707	5.06566	22.2796	0.000649451	0.0286122
Zm00001d053817	1.22109	3.71355	17.0381	0.00171967	0.0486446
Zm00001d003275	1.22051	1.78299	26.33	0.000339904	0.0209192
Zm00001d012381	1.21939	1.66098	17.4297	0.00158871	0.0467626
Zm00001d050339	1.21901	5.52988	28.1101	0.000261656	0.0182382
Zm00001d000071	1.21782	3.76268	23.7097	0.000512103	0.0256703
Zm00001d050125	1.21616	5.60695	27.3991	0.000290041	0.0191819
Zm00001d003457	1.21329	7.33795	36.3644	8.97e-05	0.010659
Zm00001d016982	1.20784	6.38268	22.787	0.000596222	0.0275477
Zm00001d046299	1.201	6.3992	33.1655	0.000132487	0.0128267
Zm00001d027749	1.19749	7.20394	29.8173	0.00020592	0.0164898
Zm00001d020345	1.19681	6.01143	33.3791	0.000128965	0.012643
Zm00001d031290	1.19575	6.57216	23.9894	0.000489437	0.0251344
Zm00001d010961	1.19118	5.38239	29.2786	0.000221835	0.0169191
Zm00001d007865	1.18278	6.51687	17.6813	0.00151082	0.045601
Zm00001d010698	1.17868	5.10632	29.2956	0.000221311	0.0169191
Zm00001d031267	1.17682	6.58841	32.4707	0.000144762	0.0134662
Zm00001d008730	1.1765	6.07363	28.1052	0.00026184	0.0182382
Zm00001d048680	1.1752	6.87624	19.4539	0.00107383	0.0377799
Zm00001d028809	1.17349	2.46892	16.9617	0.00174669	0.0490949
Zm00001d032069	1.16969	3.2909	18.6185	0.00125788	0.0412108
Zm00001d020969	1.16492	4.50278	17.3464	0.00161555	0.0473029
Zm00001d014178	1.16163	4.86031	26.2747	0.000342753	0.020946
Zm00001d028601	1.16035	7.86948	40.8477	5.42e-05	0.00793664
Zm00001d037911	1.15687	2.90977	23.3122	0.000546494	0.0264557
Zm00001d035447	1.15531	5.98293	28.2876	0.000255093	0.0181166
Zm00001d021900	1.15155	3.47459	27.4749	0.000286846	0.0191042
Zm00001d029721	1.15093	3.22494	33.8708	0.000121269	0.0124661
Zm00001d048621	1.14528	5.31057	24.8835	0.000424558	0.0237585
Zm00001d010493	1.13596	4.69846	44.7294	3.63e-05	0.00635802
Zm00001d028693	1.13545	6.63111	37.5072	7.85e-05	0.00999129
Zm00001d034651	1.13137	2.52691	22.4888	0.000626847	0.028038
Zm00001d011125	1.12861	4.24047	26.4147	0.000335601	0.0207444
Zm00001d011700	1.12832	4.37201	32.9397	0.000136337	0.0128941
Zm00001d037057	1.12676	5.57667	33.0707	0.000134088	0.0128941
Zm00001d042598	1.12427	6.57831	25.1476	0.000407387	0.0231912
Zm00001d008665	1.12236	3.07487	26.6249	0.000325198	0.0202917
Zm00001d051313	1.12213	2.43821	17.0654	0.00171015	0.0484235
Zm00001d034650	1.12207	4.27959	24.4559	0.000454223	0.0244895
Zm00001d026480	1.11929	1.32633	17.7103	0.00150212	0.0454648
Zm00001d042899	1.11827	4.09885	25.4149	0.000390835	0.0224924
Zm00001d035501	1.1173	5.23682	21.504	0.000742131	0.0307833
Zm00001d006340	1.1157	5.94722	28.2412	0.000256789	0.0181166
Zm00001d031807	1.11413	3.46109	25.7405	0.000371742	0.0219352
Zm00001d029209	1.11375	4.44808	32.2881	0.000148209	0.0136526
Zm00001d002019	1.11356	4.00091	29.803	0.000206327	0.0164898
Zm00001d007231	1.11326	6.67196	18.3819	0.00131665	0.0423438
Zm00001d041236	1.1122	6.96045	17.8061	0.00147386	0.0451577
Zm00001d025474	1.11158	5.46751	38.0875	7.35e-05	0.00969903
Zm00001d048393	1.1101	2.03154	18.267	0.00134636	0.0427759
Zm00001d044994	1.10691	2.08936	24.4096	0.000457579	0.0245879
Zm00001d052903	1.10496	5.40662	23.6709	0.000515338	0.0257869
Zm00001d021803	1.10453	3.52614	19.8742	0.000993415	0.0359964
Zm00001d015777	1.10408	2.01525	23.5067	0.000529328	0.0261101
Zm00001d022342	1.09785	5.6086	24.5057	0.000450648	0.0244004
Zm00001d021303	1.09046	2.34587	20.5796	0.000873912	0.0338724
Zm00001d044686	1.08619	10.6173	22.3836	0.000638091	0.0282696
Zm00001d041154	1.08606	3.2203	17.0823	0.00170426	0.0484017
Zm00001d008153	1.08577	4.55004	21.5575	0.00073525	0.0307677
Zm00001d013461	1.0855	4.013	18.0935	0.00139276	0.0436151
Zm00001d042480	1.07705	5.11594	44.8792	3.58e-05	0.00634228
Zm00001d012338	1.07612	6.50745	38.4383	7.06e-05	0.00956336
Zm00001d002579	1.07493	5.14458	24.297	0.000465868	0.0247805
Zm00001d015477	1.07213	7.91919	21.813	0.000703439	0.0298325
Zm00001d017801	1.07017	4.76741	20.0518	0.000961578	0.0353131
Zm00001d042932	1.06805	3.09153	21.7844	0.000706911	0.0299351
Zm00001d049870	1.06706	3.37559	21.5678	0.000733932	0.0307587
Zm00001d014625	1.05872	5.64787	31.9365	0.000155122	0.01384
Zm00001d046593	1.05837	6.79771	44.5729	3.69e-05	0.00637645
Zm00001d013725	1.05731	5.29943	19.0476	0.00115903	0.039241
Zm00001d047995	1.05226	3.46333	17.5621	0.00154714	0.0461958
Zm00001d021490	1.04981	2.29968	22.2182	0.000656261	0.0287153
Zm00001d012362	1.04949	3.60414	17.9895	0.00142147	0.044279
Zm00001d041387	1.04827	4.90356	19.0905	0.00114967	0.0391108
Zm00001d024778	1.04707	6.31822	17.9551	0.00143112	0.044279
Zm00001d046632	1.04472	6.43228	24.2203	0.00047162	0.0248714
Zm00001d026452	1.04365	4.99846	18.8089	0.00121282	0.0402458
Zm00001d016662	1.04284	4.88487	24.2983	0.000465775	0.0247805
Zm00001d034191	1.04044	4.04559	22.9975	0.000575673	0.027052
MSTRG.17577	1.03647	3.33932	17.0693	0.00170878	0.0484235
MSTRG.28774	1.03503	3.48643	29.8674	0.000204511	0.0164841
Zm00001d030860	1.0329	2.83263	18.3605	0.00132213	0.0423438
Zm00001d052458	1.03225	5.13408	31.484	0.000164592	0.0142372
Zm00001d043117	1.03063	3.90417	23.9781	0.000490328	0.0251344
MSTRG.25255	1.02991	6.14524	17.8424	0.00146331	0.0449806
Zm00001d042279	1.02928	6.69074	25.5635	0.00038198	0.0221563
Zm00001d016160	1.02729	2.50168	23.642	0.000517775	0.0258178
Zm00001d005622	1.02335	4.00482	17.2386	0.00165109	0.047752
Zm00001d026370	1.01907	6.23908	22.0892	0.000670867	0.028863
Zm00001d009090	1.01775	3.44979	29.6148	0.000211739	0.0168057
Zm00001d003833	1.01558	6.39546	22.1095	0.000668544	0.028863
Zm00001d019712	1.01491	4.59617	27.2687	0.000295632	0.0193711
Zm00001d042721	1.01335	5.78934	18.4196	0.00130707	0.0421663
Zm00001d038365	1.01088	4.88375	48.0347	2.64e-05	0.00526966
Zm00001d002992	1.00902	4.67955	26.7873	0.000317423	0.0200577
Zm00001d025924	1.00726	5.22746	20.2321	0.000930506	0.0347373
Zm00001d005018	1.0072	7.73169	17.4293	0.00158886	0.0467626
Zm00001d038753	1.00549	3.42356	20.2501	0.000927461	0.0346692
Zm00001d043614	1.00533	5.03689	18.3039	0.00133675	0.0425182
Zm00001d031555	1.00487	4.25924	20.3151	0.000916607	0.0345001
Zm00001d046210	1.00482	4.99085	20.7765	0.000843654	0.0330154
Zm00001d018076	1.00201	4.08138	23.6432	0.000517674	0.0258178
Zm00001d040056	1.00042	4.57064	55.6301	1.35e-05	0.00362489
Zm00001d021978	0.99937	3.78178	27.6029	0.000281546	0.0189739
Zm00001d048220	0.98856	1.84794	18.2315	0.0013557	0.0429284
Zm00001d025199	0.986409	4.60098	24.7935	0.000430606	0.0238251
Zm00001d038860	0.984176	6.50002	20.3834	0.000905346	0.0342944
Zm00001d006330	0.981627	5.87404	18.9958	0.00117047	0.0394401
Zm00001d031790	0.977004	5.66943	26.9602	0.000309384	0.0198146
Zm00001d026182	0.974881	3.78111	22.6646	0.000608575	0.027631
Zm00001d010713	0.97422	2.45775	17.7579	0.001488	0.0452947
Zm00001d052147	0.972856	3.50116	23.5763	0.000523346	0.0260498
Zm00001d035494	0.971615	4.49309	27.8122	0.000273128	0.0187178
Zm00001d004698	0.967979	5.7815	18.4833	0.00129108	0.0420012
Zm00001d040567	0.963208	7.54654	27.5208	0.000284932	0.0190663
Zm00001d020348	0.963032	4.89217	22.9779	0.000577548	0.027052
Zm00001d005885	0.956401	3.39784	16.9757	0.00174172	0.0490727
Zm00001d007185	0.952304	3.87169	26.4198	0.000335345	0.0207444
Zm00001d044093	0.951679	3.02601	20.8537	0.000832126	0.0327536
Zm00001d004019	0.947294	4.05013	28.27	0.000255733	0.0181166
Zm00001d022367	0.945422	4.68539	26.9931	0.00030788	0.0197628
Zm00001d032740	0.945189	5.4617	21.2576	0.000774807	0.0314489
Zm00001d023596	0.943411	4.84759	24.7538	0.000433306	0.0238251
Zm00001d008727	0.939724	6.91959	22.0285	0.000677866	0.029052
Zm00001d053889	0.938365	6.21506	17.6237	0.00152825	0.0459143
Zm00001d030516	0.927535	3.22153	18.4781	0.00129237	0.0420012
Zm00001d038522	0.927385	5.67478	32.8775	0.000137419	0.012953
Zm00001d028649	0.926973	4.64199	21.5102	0.000741334	0.0307833
Zm00001d003671	0.925292	5.01596	38.4483	7.06e-05	0.00956336
Zm00001d034572	0.923878	2.16388	16.7889	0.0018097	0.0499463
Zm00001d043527	0.923306	4.54144	22.695	0.000605475	0.0276051
Zm00001d042293	0.922664	4.49093	27.7052	0.000277394	0.0188388
Zm00001d043993	0.921795	4.24255	17.1118	0.00169409	0.0482692
Zm00001d016586	0.915984	2.66905	18.1241	0.00138444	0.0434025
Zm00001d033167	0.905779	5.48305	31.7032	0.00015992	0.0140472
Zm00001d042833	0.904119	5.64433	34.3317	0.000114544	0.0121604
Zm00001d049380	0.900248	5.08679	18.9237	0.0011866	0.039737
Zm00001d028776	0.899848	6.28427	19.0145	0.00116633	0.039427
Zm00001d017987	0.898537	6.69333	22.9416	0.000581048	0.0270698
Zm00001d038167	0.897856	5.26667	21.2619	0.000774222	0.0314489
Zm00001d020097	0.897831	3.09757	22.8287	0.000592081	0.0274935
Zm00001d045945	0.895384	5.57731	21.0248	0.000807254	0.0322583
Zm00001d028962	0.894378	4.18247	22.5068	0.000624952	0.0280113
Zm00001d020040	0.894251	3.09439	17.1845	0.00166928	0.0481798
MSTRG.23411	0.893148	3.03966	23.4403	0.000535118	0.0261101
MSTRG.16107	0.891148	3.50635	19.1582	0.00113508	0.0388473
Zm00001d039866	0.890181	4.02887	20.5306	0.000881637	0.0339377
Zm00001d028187	0.886878	5.62754	34.7647	0.000108627	0.0119456
Zm00001d008692	0.882649	2.29123	17.7984	0.00147612	0.0451577
Zm00001d003212	0.881401	4.98969	27.0951	0.000303279	0.0196172
Zm00001d025735	0.87761	5.28915	18.14	0.00138014	0.0433621
Zm00001d049171	0.877147	4.53862	21.4568	0.000748256	0.0309018
Zm00001d029884	0.874257	4.38848	17.8432	0.0014631	0.0449806
Zm00001d027055	0.87152	6.17249	22.9896	0.000576431	0.027052
Zm00001d027630	0.871386	5.71658	26.9197	0.000311246	0.0198442
Zm00001d000358	0.869287	5.2348	17.5199	0.00156026	0.0463536
Zm00001d023677	0.867321	6.45339	22.6978	0.000605191	0.0276051
Zm00001d005940	0.866975	3.31117	17.5478	0.00155158	0.0461958
Zm00001d036972	0.866052	5.02806	21.3299	0.000765043	0.0312764
Zm00001d020804	0.864811	7.55666	18.9352	0.00118401	0.039737
Zm00001d028576	0.860814	4.95192	21.4329	0.000751382	0.030912
Zm00001d026200	0.858404	3.54304	26.6243	0.000325229	0.0202917
Zm00001d045136	0.850235	5.6433	27.3599	0.000291708	0.0192473
Zm00001d012242	0.8487	4.64502	20.5225	0.000882918	0.0339377
Zm00001d025674	0.848586	3.65042	17.7124	0.0015015	0.0454648
Zm00001d025991	0.84799	2.89021	24.3618	0.000461077	0.0246824
Zm00001d045202	0.846009	4.06685	19.4627	0.00107208	0.0377799
Zm00001d042117	0.844952	5.31601	27.7904	0.000273991	0.0187317
Zm00001d046454	0.842374	5.77848	34.4014	0.000113567	0.0121132
Zm00001d052519	0.832634	3.78419	17.3583	0.00161169	0.0472385
Zm00001d034039	0.827557	2.89692	19.5934	0.00104631	0.0372097
Zm00001d017874	0.823731	5.42865	17.4898	0.00156969	0.0463908
Zm00001d040581	0.82266	2.83506	18.6598	0.00124795	0.0410276
Zm00001d023659	0.820819	4.34766	20.798	0.000840426	0.03298
Zm00001d023507	0.818102	4.0963	34.0467	0.000118649	0.0123308
Zm00001d032428	0.811825	5.39561	17.7953	0.00147703	0.0451577
Zm00001d040477	0.807959	5.32616	24.2557	0.000468953	0.0247805
Zm00001d019117	0.807592	5.80978	18.7328	0.00123061	0.0406934
Zm00001d038971	0.805394	4.52866	22.2138	0.000656753	0.0287153
Zm00001d035616	0.803633	5.79672	28.0141	0.00026529	0.0183581
Zm00001d015985	0.802376	4.77759	20.4401	0.000896127	0.034036
Zm00001d052409	0.800971	6.1269	20.8522	0.000832347	0.0327536
Zm00001d008324	0.794103	4.09437	24.7861	0.000431112	0.0238251
Zm00001d051564	0.778602	4.00531	17.7529	0.0014895	0.0452947
Zm00001d047913	0.774289	4.71818	26.2499	0.000344038	0.020946
Zm00001d026627	0.769706	3.54533	19.1338	0.0011403	0.0389322
Zm00001d049914	0.763897	3.66279	27.0182	0.00030674	0.0197343
Zm00001d044189	0.763729	4.42046	21.8395	0.000700233	0.029789
Zm00001d038272	0.762802	4.56862	17.7719	0.00148387	0.0452205
Zm00001d011563	0.758465	4.55514	20.4656	0.000892019	0.0340084
Zm00001d011500	0.752131	5.00878	16.8794	0.00177639	0.0494863
Zm00001d009700	0.751946	7.58893	17.9739	0.00142584	0.044279
MSTRG.3280	0.748057	5.00919	20.1173	0.000950152	0.0351012
Zm00001d028931	0.746468	4.73733	16.7901	0.00180925	0.0499463
Zm00001d019217	0.74622	4.99215	19.173	0.0011319	0.038817
Zm00001d039848	0.745802	6.68081	20.5914	0.00087205	0.0338724
Zm00001d006896	0.744268	4.86946	19.0815	0.00115162	0.0391146
Zm00001d052185	0.744233	6.3626	20.2004	0.000935882	0.0348337
Zm00001d017959	0.742207	4.23732	21.0289	0.000806656	0.0322583
Zm00001d034525	0.739648	4.41841	20.5159	0.000883968	0.0339377
Zm00001d048065	0.738777	6.0567	18.3359	0.00132845	0.0423968
Zm00001d002075	0.734158	5.88949	21.1587	0.000788394	0.0318637
Zm00001d037937	0.733838	5.25656	24.4583	0.000454048	0.0244895
Zm00001d020771	0.733519	6.2189	20.909	0.000823991	0.0326512
Zm00001d016855	0.733049	5.52486	22.7434	0.000600588	0.0275726
Zm00001d053753	0.73288	5.80491	25.5875	0.000380571	0.0221563
Zm00001d023217	0.729406	4.18471	18.9484	0.00118103	0.0397017
Zm00001d007295	0.727399	4.48621	21.8388	0.000700312	0.029789
Zm00001d002175	0.726723	6.23828	19.3317	0.00109865	0.0381996
Zm00001d002405	0.704257	4.57506	19.2922	0.00110682	0.0383428
Zm00001d053087	0.703964	3.1686	16.9353	0.00175617	0.0492774
Zm00001d048540	0.689109	4.84995	28.1857	0.000258835	0.0181774
Zm00001d006551	0.684611	4.93422	24.7764	0.000431766	0.0238251
Zm00001d002928	0.679823	4.26438	18.8524	0.0012028	0.0400555
Zm00001d005244	0.661398	3.97376	19.1911	0.00112806	0.0387474
Zm00001d027206	0.64408	4.71155	24.147	0.000477192	0.0250257
Zm00001d007577	0.619475	4.38416	16.9968	0.00173423	0.04891
Zm00001d043727	0.613476	4.19938	17.2895	0.00163419	0.0475261
Zm00001d048359	0.588326	4.67217	19.6074	0.0010436	0.0371973

## Sheet: Group II
FileS1.2. Significant differentially downregulated genes in Mop1 wildtype in response to ABA (422 DEGs).
Gene_id_v4	log2FC	log2CPM	F	PValue	FDR
Zm00001d013389	-0.51855	4.63717	16.8768	0.00177733	0.0494863
Zm00001d039142	-0.599201	5.36774	17.1005	0.00169798	0.0483201
Zm00001d008327	-0.610044	5.41186	19.3207	0.00110092	0.038227
Zm00001d043786	-0.626328	5.53512	18.5132	0.00128364	0.0418133
Zm00001d050216	-0.638598	3.95421	18.668	0.00124598	0.0410102
Zm00001d047128	-0.643939	5.16685	20.278	0.000922784	0.034561
Zm00001d045944	-0.656032	3.69963	17.5316	0.00155661	0.0462936
Zm00001d035752	-0.66184	5.30558	17.168	0.00167486	0.0481897
Zm00001d013076	-0.673084	5.51724	16.9239	0.00176027	0.0492774
Zm00001d031535	-0.695282	4.42883	21.8982	0.000693197	0.029575
Zm00001d004839	-0.697237	6.57936	17.8068	0.00147366	0.0451577
Zm00001d014766	-0.745829	4.19126	28.5129	0.00024704	0.0179718
Zm00001d045599	-0.747959	4.54182	22.1347	0.000665671	0.028863
Zm00001d052423	-0.751065	4.0673	18.8168	0.00121101	0.0402329
Zm00001d000120	-0.762454	5.46679	20.2146	0.000933472	0.0348022
Zm00001d021400	-0.772268	4.91879	23.9856	0.000489734	0.0251344
Zm00001d041941	-0.772369	3.84787	25.5923	0.00038029	0.0221563
Zm00001d011900	-0.779756	4.17849	21.074	0.000800256	0.0321381
Zm00001d038923	-0.781816	7.67376	17.5932	0.00153756	0.0459914
Zm00001d047582	-0.783501	4.88391	16.9215	0.00176115	0.0492774
Zm00001d026652	-0.783631	7.15116	20.3339	0.000913478	0.0345001
Zm00001d041773	-0.786857	4.35107	20.5583	0.000877248	0.0339377
Zm00001d047516	-0.786923	4.12513	20.0566	0.000960743	0.0353131
Zm00001d036148	-0.795932	5.39496	24.8182	0.000428941	0.0238251
Zm00001d028373	-0.796026	4.89038	16.803	0.00180448	0.0498993
Zm00001d034345	-0.804179	5.55628	22.9556	0.000579698	0.027052
Zm00001d006250	-0.808252	5.02764	23.1721	0.000559261	0.0267127
Zm00001d017333	-0.812979	4.14274	19.3724	0.00109031	0.0380762
Zm00001d048086	-0.817595	4.68778	25.6141	0.000379017	0.0221563
Zm00001d012771	-0.817765	4.66109	27.4047	0.000289801	0.0191819
Zm00001d012231	-0.822887	5.62949	20.3563	0.000909791	0.0344168
Zm00001d034898	-0.826591	3.70658	20.0347	0.0009646	0.0353131
Zm00001d042125	-0.834352	4.19488	17.6176	0.0015301	0.0459143
Zm00001d046583	-0.835825	7.03668	17.6422	0.00152262	0.045811
Zm00001d014496	-0.83655	4.22988	19.1221	0.00114283	0.0389716
Zm00001d047894	-0.850723	4.74152	25.4756	0.000387186	0.0223277
Zm00001d037337	-0.851966	4.98976	19.9399	0.000981483	0.0357008
Zm00001d018926	-0.862532	5.88587	20.873	0.000829269	0.0327536
ENSRNA049467592	-0.865443	4.86544	23.0678	0.000568997	0.0268914
Zm00001d053547	-0.865602	6.28347	17.2772	0.00163825	0.0475261
Zm00001d045778	-0.86567	2.36692	19.4286	0.00107893	0.0377799
Zm00001d017540	-0.872342	4.84043	25.8419	0.000366021	0.0218167
Zm00001d000107	-0.876824	3.80749	18.606	0.0012609	0.041262
Zm00001d043921	-0.878161	3.87687	23.0396	0.000571659	0.0269421
Zm00001d032181	-0.882585	5.20597	17.3325	0.00162007	0.0473135
Zm00001d002716	-0.883718	4.55742	17.6097	0.00153253	0.0459143
ENSRNA049459593	-0.889504	5.96977	23.2158	0.00055524	0.026639
Zm00001d045544	-0.891041	8.14477	17.2642	0.00164256	0.0476023
ENSRNA049459132	-0.891148	2.65923	17.9643	0.00142855	0.044279
Zm00001d049583	-0.89136	4.99656	25.7638	0.000370416	0.0219352
Zm00001d004052	-0.893698	7.55597	18.711	0.00123575	0.0408156
Zm00001d031449	-0.896868	4.10301	17.285	0.0016357	0.0475261
Zm00001d044111	-0.899739	5.11795	27.5844	0.000282303	0.0189798
Zm00001d023950	-0.899783	5.35574	24.904	0.000423199	0.0237585
Zm00001d003164	-0.90066	4.92114	29.0831	0.000227969	0.017202
Zm00001d049610	-0.901546	5.38023	23.3301	0.000544888	0.0264266
Zm00001d013507	-0.905186	4.67426	30.6244	0.000184536	0.0155155
Zm00001d021511	-0.90541	7.49518	25.1474	0.000407397	0.0231912
Zm00001d005089	-0.906881	3.34179	20.4873	0.000888538	0.0339967
Zm00001d010535	-0.906958	7.28445	20.5233	0.000882791	0.0339377
Zm00001d035171	-0.90864	3.49618	20.9844	0.000813036	0.0323527
Zm00001d011849	-0.918706	3.63161	18.3108	0.00133495	0.0425182
Zm00001d007896	-0.924663	5.60587	20.6556	0.000862075	0.0335512
Zm00001d025241	-0.924691	5.57259	17.6672	0.00151506	0.045632
Zm00001d045889	-0.929873	6.24078	19.6427	0.00103678	0.0370008
Zm00001d020272	-0.937881	4.10281	24.8877	0.000424282	0.0237585
Zm00001d015407	-0.938286	2.79334	18.4107	0.00130934	0.0421663
Zm00001d029577	-0.938348	3.2625	24.3252	0.000463776	0.0247801
Zm00001d006950	-0.944001	4.27313	17.7833	0.00148052	0.0452157
Zm00001d026501	-0.944749	9.14142	17.3622	0.00161043	0.0472385
Zm00001d043780	-0.950328	5.93112	30.3584	0.000191278	0.0155947
Zm00001d006871	-0.963805	7.327	20.0754	0.000957439	0.0353131
Zm00001d032504	-0.967706	5.89252	21.1314	0.000792197	0.0319448
Zm00001d037644	-0.97619	3.04505	18.3541	0.00132377	0.0423438
Zm00001d029325	-0.98257	6.68114	19.4236	0.00107992	0.0377799
Zm00001d034851	-0.983167	4.30898	31.9477	0.000154897	0.01384
Zm00001d003058	-0.985279	3.82845	20.8614	0.000830987	0.0327536
Zm00001d033181	-0.985762	4.70274	27.2099	0.000298196	0.0194184
Zm00001d017659	-0.986667	4.08486	17.9972	0.00141932	0.044279
Zm00001d003663	-0.988883	5.45755	17.4803	0.00157267	0.0464307
Zm00001d006879	-0.989777	5.15311	16.8805	0.00177597	0.0494863
Zm00001d051474	-0.99088	1.38435	16.878	0.0017769	0.0494863
Zm00001d034715	-0.99355	6.04674	21.949	0.000687169	0.0294063
Zm00001d017279	-0.995139	5.24747	27.29	0.00029471	0.0193553
Zm00001d026542	-0.995382	5.70864	20.5421	0.000879811	0.0339377
Zm00001d031665	-0.997632	2.21429	20.5005	0.000886425	0.033986
Zm00001d046995	-0.99981	5.88621	17.6707	0.00151402	0.045632
ENSRNA049453565	-1.00218	5.50351	35.9602	9.41e-05	0.0109389
Zm00001d052804	-1.00631	2.93735	20.7622	0.0008458	0.0330538
Zm00001d017187	-1.0081	4.46475	23.9517	0.000492423	0.0251426
Zm00001d031653	-1.01614	4.0291	18.3742	0.00131862	0.0423438
Zm00001d051062	-1.01712	5.80342	19.3459	0.00109574	0.0381919
Zm00001d033790	-1.01778	7.13445	18.1911	0.00136644	0.043172
Zm00001d012274	-1.01834	7.03945	16.9589	0.0017477	0.0490949
Zm00001d006282	-1.02952	2.00213	20.3076	0.000917841	0.0345001
Zm00001d032973	-1.03225	6.88678	23.2092	0.000555839	0.026639
Zm00001d043489	-1.03468	1.19081	16.9308	0.00175779	0.0492774
Zm00001d003085	-1.03524	5.74711	22.8929	0.000585776	0.0272453
Zm00001d045432	-1.0412	3.56667	18.2404	0.00135335	0.0429021
Zm00001d046317	-1.04129	5.58141	25.5782	0.000381118	0.0221563
Zm00001d021667	-1.04171	5.74984	23.9999	0.000488608	0.0251344
Zm00001d040441	-1.04192	4.44904	20.0425	0.000963221	0.0353131
Zm00001d041927	-1.04794	4.15804	17.3345	0.00161943	0.0473135
Zm00001d044640	-1.05204	3.19046	26.3133	0.000340765	0.0209268
Zm00001d033634	-1.05317	4.84437	18.4479	0.00129994	0.0421508
Zm00001d006704	-1.05501	4.54413	18.8522	0.00120285	0.0400555
Zm00001d021652	-1.06237	6.55164	20.9631	0.000816122	0.03243
Zm00001d022374	-1.06654	4.67153	37.6501	7.73e-05	0.00988184
Zm00001d052039	-1.06674	3.79843	41.6107	5e-05	0.00764892
Zm00001d035195	-1.06737	3.01959	18.3046	0.00133654	0.0425182
Zm00001d016294	-1.06778	3.39299	26.147	0.000349429	0.0210936
Zm00001d028510	-1.06928	4.1111	25.5204	0.000384523	0.0222193
Zm00001d004439	-1.07136	3.80748	19.3687	0.00109107	0.0380762
MSTRG.9307	-1.07688	4.57583	18.0175	0.00141369	0.0441732
Zm00001d035963	-1.07858	4.77649	22.4208	0.000634092	0.0281541
Zm00001d053988	-1.08045	3.9554	25.1231	0.000408942	0.023205
Zm00001d044476	-1.08165	5.35378	17.6936	0.00150712	0.0455379
Zm00001d049851	-1.0862	4.07734	27.2173	0.000297873	0.0194184
Zm00001d045579	-1.09157	3.72989	22.2011	0.000658183	0.0287153
Zm00001d020578	-1.09724	3.30994	18.9127	0.00118909	0.039737
Zm00001d034416	-1.10017	3.16441	18.5305	0.00127936	0.0417218
Zm00001d035629	-1.10176	4.35646	27.6572	0.000279333	0.0188696
Zm00001d026016	-1.10395	3.13569	19.5437	0.00105602	0.0374987
Zm00001d031303	-1.10514	6.06364	23.9724	0.000490782	0.0251344
Zm00001d020537	-1.10714	5.32862	29.3199	0.000220563	0.0169191
Zm00001d009509	-1.10987	5.09063	19.5336	0.00105801	0.0375224
Zm00001d032688	-1.11155	5.94916	36.4512	8.88e-05	0.010659
Zm00001d047796	-1.11584	4.77567	18.6436	0.00125184	0.0411078
Zm00001d018609	-1.11986	3.2591	22.815	0.00059344	0.0275116
Zm00001d016276	-1.12163	6.05206	20.5354	0.000880872	0.0339377
Zm00001d022175	-1.12439	4.5935	17.7071	0.0015031	0.0454648
Zm00001d047697	-1.1276	6.14654	19.901	0.00098853	0.0359111
Zm00001d042141	-1.12913	2.93863	18.7779	0.00122003	0.0404221
Zm00001d006823	-1.12991	4.69723	23.256	0.000551572	0.0266083
Zm00001d026554	-1.13144	4.03205	42.8849	4.38e-05	0.00717689
Zm00001d037495	-1.1341	4.10857	31.6732	0.000160551	0.0140591
Zm00001d051543	-1.13553	7.64476	20.2746	0.000923348	0.034561
Zm00001d008209	-1.13789	5.85901	18.4162	0.00130792	0.0421663
ENSRNA049475223	-1.13855	0.89311	16.8571	0.00178455	0.049594
Zm00001d002284	-1.14226	5.82094	19.493	0.00106603	0.0376694
MSTRG.30033	-1.1478	1.79619	20.1736	0.000940458	0.0348793
Zm00001d000222	-1.15226	7.69914	17.1507	0.00168077	0.048199
Zm00001d021653	-1.15358	7.07151	29.6979	0.000209329	0.0166828
Zm00001d016696	-1.15485	3.93205	19.4787	0.00106887	0.037719
Zm00001d006064	-1.15514	4.85565	40.1259	5.86e-05	0.00841113
Zm00001d050079	-1.15641	1.29594	17.909	0.00144419	0.0445861
Zm00001d034692	-1.15663	5.23261	17.121	0.00169094	0.0482648
MSTRG.20591	-1.15976	1.79294	18.3467	0.00132568	0.0423561
Zm00001d048368	-1.16769	7.66484	23.9886	0.000489502	0.0251344
Zm00001d048593	-1.16795	8.94949	19.2221	0.00112149	0.0386151
Zm00001d045538	-1.17177	5.3856	33.9762	0.000119691	0.0123486
Zm00001d047253	-1.17691	10.1748	18.5664	0.00127055	0.0414822
Zm00001d031701	-1.1786	5.94248	17.1475	0.00168184	0.048199
Zm00001d016036	-1.17992	5.13586	34.6747	0.000109826	0.0120133
Zm00001d015008	-1.18626	3.36962	20.4594	0.000893002	0.0340084
Zm00001d000402	-1.18893	3.33415	18.1567	0.00137565	0.0432987
Zm00001d051309	-1.19432	2.78067	18.4548	0.00129821	0.0421427
Zm00001d041769	-1.19446	6.20414	32.1827	0.000150242	0.0137505
Zm00001d047207	-1.19626	5.04389	31.9919	0.000154007	0.01384
Zm00001d003848	-1.19814	4.28905	46.7845	2.97e-05	0.00569298
Zm00001d052586	-1.19878	1.69031	19.071	0.00115392	0.0391146
Zm00001d015744	-1.20158	2.59853	24.7563	0.000433137	0.0238251
Zm00001d006882	-1.20902	2.55956	19.7511	0.0010162	0.036511
Zm00001d020869	-1.21202	3.15377	20.3062	0.000918073	0.0345001
Zm00001d002806	-1.21501	3.30586	22.0843	0.000671422	0.028863
Zm00001d041404	-1.21551	4.08796	22.6541	0.00060965	0.027631
Zm00001d012707	-1.2168	1.82943	17.1338	0.00168655	0.0482241
Zm00001d006521	-1.21866	4.23755	25.6917	0.000374529	0.0220459
ENSRNA049461556	-1.21968	2.80008	21.2881	0.000770662	0.0314156
Zm00001d021200	-1.22345	3.73517	50.9767	2.01e-05	0.00450075
Zm00001d020147	-1.22521	5.44421	17.5025	0.00156569	0.0463646
Zm00001d013010	-1.22645	3.93178	21.5353	0.000738099	0.0307833
Zm00001d014852	-1.22804	4.4385	27.1706	0.000299925	0.0194725
Zm00001d028742	-1.23071	7.43239	25.9603	0.000359475	0.0215624
Zm00001d034017	-1.23219	9.70309	20.4409	0.000896	0.034036
Zm00001d003488	-1.24533	2.11916	17.0705	0.00170838	0.0484235
Zm00001d009373	-1.24599	4.88747	23.9153	0.000495324	0.0251852
Zm00001d042772	-1.25412	6.26834	55.2784	1.39e-05	0.00368533
MSTRG.8136	-1.25432	4.32074	21.4735	0.000746084	0.0308579
ENSRNA049466250	-1.25716	6.48911	18.1533	0.00137655	0.0432987
MSTRG.8003	-1.25849	3.83136	17.7413	0.00149292	0.0453501
Zm00001d029075	-1.26156	5.98775	33.5688	0.000125929	0.012643
Zm00001d031046	-1.26896	2.23303	21.6273	0.000726394	0.030623
MSTRG.15013	-1.26983	0.895094	21.0387	0.000805269	0.0322583
MSTRG.17331	-1.27	1.75382	19.3344	0.00109809	0.0381996
Zm00001d002993	-1.27018	4.77705	23.5012	0.000529807	0.0261101
Zm00001d023781	-1.27175	6.23175	22.6883	0.000606161	0.0276051
Zm00001d002951	-1.27498	4.22065	19.6441	0.00103653	0.0370008
Zm00001d017069	-1.28005	3.37378	35.9199	9.45e-05	0.0109465
MSTRG.23575	-1.28087	2.34627	25.5569	0.000382369	0.0221563
Zm00001d033308	-1.28151	3.232	38.0133	7.41e-05	0.00971483
Zm00001d007154	-1.28835	6.53645	21.8239	0.000702114	0.0298209
Zm00001d010755	-1.28857	3.20828	21.9174	0.00069091	0.0295218
Zm00001d029124	-1.28981	5.84257	28.4609	0.000248869	0.0180344
Zm00001d015569	-1.29182	8.30755	25.0841	0.000411441	0.0232727
Zm00001d003504	-1.30038	3.00189	24.5624	0.00044661	0.0242744
Zm00001d026160	-1.30046	7.54396	23.1166	0.000564414	0.026783
Zm00001d043520	-1.30117	5.10501	28.0841	0.000262632	0.0182382
Zm00001d027320	-1.3093	5.06562	25.3101	0.000397228	0.0228141
Zm00001d043742	-1.30959	2.27523	34.3089	0.000114866	0.0121604
Zm00001d045685	-1.31782	7.16576	23.8865	0.000497631	0.0252572
Zm00001d004009	-1.32042	5.62828	44.456	3.73e-05	0.00637645
Zm00001d033747	-1.32074	6.44174	25.7381	0.000371874	0.0219352
Zm00001d037784	-1.32578	3.14616	22.455	0.000630436	0.0280797
Zm00001d006285	-1.32958	2.45848	21.1281	0.000792652	0.0319448
MSTRG.14338	-1.33419	3.46037	17.8359	0.0014652	0.0449898
Zm00001d016721	-1.33463	2.07519	18.354	0.0013238	0.0423438
Zm00001d039771	-1.34555	2.94136	30.5784	0.000185682	0.0155155
Zm00001d006279	-1.34893	1.34594	23.4451	0.0005347	0.0261101
Zm00001d026530	-1.35116	5.83286	17.1585	0.00167811	0.0481897
Zm00001d035875	-1.3542	4.32213	23.5384	0.000526593	0.0261087
Zm00001d047186	-1.36066	7.19005	26.8009	0.00031678	0.0200577
Zm00001d020280	-1.37114	1.81124	31.59	0.000162313	0.014083
Zm00001d022965	-1.37722	6.61461	19.1353	0.00113998	0.0389322
Zm00001d024382	-1.37949	5.0653	29.3295	0.00022027	0.0169191
Zm00001d016154	-1.37955	3.35801	20.1952	0.000936772	0.0348337
Zm00001d031659	-1.38299	6.59928	42.2349	4.68e-05	0.00746174
Zm00001d033279	-1.38303	2.63709	32.3592	0.000146854	0.0135718
Zm00001d043444	-1.3864	5.44626	35.0414	0.000105035	0.0116408
Zm00001d039414	-1.39106	6.36037	36.2415	9.1e-05	0.0107521
Zm00001d042611	-1.39108	2.14143	17.1301	0.00168781	0.0482241
Zm00001d021995	-1.39218	3.91533	24.1158	0.000479583	0.0250805
Zm00001d038718	-1.39621	5.43332	27.9274	0.000268623	0.0185435
Zm00001d049525	-1.39698	5.15385	26.3744	0.000337645	0.0208253
Zm00001d044465	-1.40436	3.81305	60.1918	9.36e-06	0.00298457
Zm00001d041476	-1.4078	2.60919	40.4618	5.65e-05	0.00818029
Zm00001d045721	-1.40852	3.73621	23.1267	0.000563473	0.026783
Zm00001d044021	-1.4105	1.46332	20.4619	0.000892612	0.0340084
Zm00001d041965	-1.41984	1.82993	17.7741	0.00148322	0.0452205
MSTRG.18583	-1.42751	2.01308	17.9875	0.00142203	0.044279
Zm00001d014918	-1.43097	7.20464	37.1086	8.22e-05	0.0102318
Zm00001d009425	-1.43576	2.26981	21.0955	0.000797229	0.0320837
Zm00001d045304	-1.43597	3.22752	30.2819	0.000193273	0.0157121
Zm00001d041701	-1.44394	5.87392	26.4623	0.000333213	0.0206869
Zm00001d003797	-1.45022	4.43171	37.2762	8.06e-05	0.0101193
Zm00001d039946	-1.46264	4.04691	50.0392	2.19e-05	0.00471156
Zm00001d011878	-1.46352	3.78618	23.1067	0.000565343	0.026783
Zm00001d044970	-1.46361	4.58366	20.3834	0.000905343	0.0342944
Zm00001d011466	-1.46674	1.37688	19.2405	0.00111763	0.0385758
Zm00001d050889	-1.47046	5.09711	19.6497	0.00103543	0.0370008
Zm00001d011451	-1.48009	3.73309	20.0068	0.000969523	0.0354019
Zm00001d016756	-1.48499	3.54436	17.3142	0.00162607	0.0473663
Zm00001d012019	-1.49296	2.54896	24.0785	0.000482464	0.0251344
Zm00001d027899	-1.50098	1.4565	20.586	0.000872903	0.0338724
Zm00001d034298	-1.50184	4.52687	52.1326	1.82e-05	0.00435343
MSTRG.8432	-1.50672	3.34868	17.7234	0.00149822	0.0454627
Zm00001d043581	-1.50727	5.75597	83.3515	1.98e-06	0.00137282
Zm00001d048737	-1.51155	4.38184	19.945	0.000980581	0.0357008
Zm00001d028953	-1.51434	3.20277	30.4606	0.000188655	0.0155597
Zm00001d012719	-1.51595	4.5069	37.7654	7.62e-05	0.00983242
Zm00001d034067	-1.52882	3.58618	23.4537	0.000533947	0.0261101
Zm00001d051110	-1.53367	5.27291	46.0435	3.19e-05	0.00582945
Zm00001d031730	-1.54535	2.51572	26.8215	0.000315813	0.0200453
Zm00001d043244	-1.55777	1.45086	23.948	0.000492713	0.0251426
Zm00001d023887	-1.5596	4.45112	50.1783	2.16e-05	0.00468808
Zm00001d052673	-1.56187	8.09241	19.4472	0.00107518	0.0377799
Zm00001d034143	-1.56541	6.08101	18.7738	0.00122098	0.0404221
Zm00001d052906	-1.57157	1.5585	22.9554	0.000579713	0.027052
Zm00001d000550	-1.58068	0.931993	21.2781	0.000772011	0.0314254
Zm00001d049657	-1.59141	3.76159	33.1401	0.000132915	0.0128267
Zm00001d003459	-1.59332	5.01022	22.0321	0.000677446	0.029052
Zm00001d037892	-1.59876	0.978673	21.5677	0.00073395	0.0307587
Zm00001d028025	-1.60154	3.74247	28.9747	0.000231457	0.0173269
Zm00001d049020	-1.60579	1.81231	22.5343	0.000622061	0.0279258
Zm00001d051802	-1.62127	4.05619	21.5199	0.000740076	0.0307833
Zm00001d020691	-1.62688	5.61976	26.6232	0.000325283	0.0202917
Zm00001d010422	-1.63268	2.06011	23.4649	0.00053296	0.0261101
Zm00001d044683	-1.63643	5.03111	38.7287	6.84e-05	0.00937169
Zm00001d003144	-1.63924	4.26713	22.4281	0.000633307	0.0281541
Zm00001d017438	-1.64485	5.16939	30.5033	0.000187571	0.0155155
Zm00001d029913	-1.65392	6.05366	19.2487	0.0011159	0.0385631
Zm00001d005821	-1.65955	3.15068	49.0312	2.4e-05	0.00501482
Zm00001d049096	-1.66928	1.98189	38.9494	6.67e-05	0.00923284
Zm00001d002514	-1.67374	3.19716	61.7216	8.33e-06	0.0028683
Zm00001d028793	-1.67627	5.78941	34.2391	0.000115859	0.0121746
Zm00001d049081	-1.67657	4.09671	36.702	8.62e-05	0.0105192
Zm00001d006511	-1.67985	6.23808	26.4941	0.000331629	0.0206338
MSTRG.24582	-1.6799	0.977509	29.5152	0.000214671	0.016825
Zm00001d018917	-1.68045	2.6387	19.0101	0.0011673	0.039427
Zm00001d004480	-1.70672	2.506	54.46	1.49e-05	0.00380517
MSTRG.23624	-1.7355	2.2452	32.9395	0.00013634	0.0128941
MSTRG.26479	-1.74987	2.59154	23.4348	0.000535601	0.0261101
Zm00001d023804	-1.75227	3.37741	21.0084	0.000809591	0.0323062
Zm00001d037023	-1.76562	2.38619	17.1311	0.00168745	0.0482241
Zm00001d039378	-1.76754	0.232458	18.2587	0.00134853	0.042797
Zm00001d050346	-1.76803	4.23825	51.9924	1.84e-05	0.00435343
Zm00001d039081	-1.77432	4.48836	26.2969	0.000341605	0.0209331
MSTRG.14718	-1.7897	3.35185	24.3663	0.000460745	0.0246824
Zm00001d004451	-1.79003	2.80697	36.3607	8.97e-05	0.010659
MSTRG.14719	-1.79284	3.35107	24.4468	0.000454884	0.0244895
MSTRG.5193	-1.79489	0.907221	22.9725	0.000578065	0.027052
Zm00001d038126	-1.79509	4.43805	35.5768	9.85e-05	0.0112276
Zm00001d024786	-1.809	3.04639	27.4272	0.000288851	0.0191819
Zm00001d017994	-1.81212	2.19039	28.8204	0.000236529	0.017476
Zm00001d014820	-1.81383	4.54571	28.3327	0.000253453	0.0180678
Zm00001d038371	-1.81536	4.36802	95.0518	1.04e-06	0.000992563
Zm00001d047944	-1.82087	1.66611	28.95	0.000232259	0.0173412
Zm00001d016435	-1.84698	2.6387	35.1541	0.000103611	0.0115735
Zm00001d003183	-1.84835	0.365223	18.6961	0.00123929	0.0408376
Zm00001d023242	-1.85016	2.74472	40.838	5.43e-05	0.00793664
Zm00001d046667	-1.85191	3.05366	36.3546	8.98e-05	0.010659
Zm00001d025901	-1.86079	4.4816	33.0183	0.000134981	0.0128941
Zm00001d026486	-1.86938	3.07961	22.638	0.000611301	0.0276616
Zm00001d028172	-1.87248	6.95995	17.504	0.00156522	0.0463646
MSTRG.1894	-1.90066	3.5018	22.7916	0.000595769	0.0275477
Zm00001d003463	-1.90262	2.22815	59.5189	9.87e-06	0.00304444
Zm00001d046642	-1.90308	6.088	58.2786	1.09e-05	0.00318603
Zm00001d052792	-1.90401	5.38447	45.0544	3.52e-05	0.00627227
MSTRG.12227	-1.91212	4.55418	21.4199	0.000753096	0.0309216
Zm00001d026594	-1.9254	3.51043	54.0785	1.54e-05	0.00386062
Zm00001d005879	-1.92665	1.22492	24.5293	0.000448963	0.0243556
Zm00001d033319	-1.92878	3.75671	31.9419	0.000155012	0.01384
Zm00001d050768	-1.94539	3.8787	133.29	1.93e-07	0.000497613
Zm00001d003676	-1.96683	5.62948	37.4591	7.9e-05	0.0100018
Zm00001d045423	-1.97121	2.51144	25.8103	0.000367794	0.0218764
MSTRG.23184	-1.97683	1.15489	16.9062	0.00176667	0.0493832
Zm00001d047671	-1.97768	2.4762	19.7638	0.00101383	0.036503
MSTRG.11350	-1.97822	1.87893	19.3148	0.00110213	0.038227
Zm00001d016031	-1.99964	3.94226	36.377	8.96e-05	0.010659
Zm00001d025707	-2.01151	3.51262	30.4234	0.000189604	0.0155698
Zm00001d053220	-2.01215	5.22044	31.8064	0.000157778	0.013989
Zm00001d035243	-2.0162	3.03568	28.714	0.000240106	0.0176028
Zm00001d002989	-2.02388	1.39003	32.1081	0.000151701	0.013769
Zm00001d020605	-2.03399	3.05891	20.1787	0.00093958	0.0348793
MSTRG.11026	-2.06982	-0.17861	19.4358	0.00107746	0.0377799
Zm00001d049722	-2.0712	0.208191	24.0045	0.000488247	0.0251344
Zm00001d024105	-2.09028	1.45824	17.8798	0.00145253	0.0447947
Zm00001d022478	-2.13623	1.84822	19.2672	0.00111204	0.0384765
Zm00001d016625	-2.15663	4.51959	64.5199	6.76e-06	0.00264956
MSTRG.14716	-2.16606	0.796928	33.3629	0.000129228	0.012643
MSTRG.15090	-2.17029	0.238289	24.8116	0.000429385	0.0238251
Zm00001d042317	-2.17322	2.62368	17.3157	0.00162557	0.0473663
Zm00001d033024	-2.22422	4.98095	19.8356	0.00100049	0.0362064
MSTRG.19736	-2.2273	1.03009	19.7367	0.0010189	0.0365466
Zm00001d048214	-2.23016	2.29166	25.902	0.000362677	0.0217086
MSTRG.30719	-2.23752	1.00401	20.6914	0.000856568	0.0333826
Zm00001d048669	-2.2516	6.35617	27.0224	0.000306553	0.0197343
Zm00001d038476	-2.25214	5.93227	23.7664	0.000507405	0.0254798
Zm00001d022637	-2.25446	4.92286	63.4005	7.34e-06	0.00270465
Zm00001d021634	-2.26068	4.48408	41.1162	5.27e-05	0.0077842
Zm00001d023994	-2.27043	7.70722	41.4096	5.11e-05	0.00764892
Zm00001d011406	-2.27415	0.964346	18.7016	0.00123798	0.0408376
MSTRG.8193	-2.27852	2.92337	35.2419	0.000102519	0.0115423
Zm00001d051223	-2.27972	2.16005	23.247	0.000552385	0.0266083
Zm00001d046134	-2.30519	2.82486	28.4359	0.000249758	0.0180344
Zm00001d011757	-2.31175	-0.0653014	19.4925	0.00106614	0.0376694
MSTRG.14683	-2.31367	4.55713	17.5564	0.0015489	0.0461958
Zm00001d051936	-2.32118	1.45512	42.5729	4.52e-05	0.00728578
Zm00001d005174	-2.3267	3.71659	84.0147	1.91e-06	0.00135398
Zm00001d047441	-2.32871	1.17753	20.0188	0.000967409	0.0353703
Zm00001d006446	-2.33906	5.3692	17.0168	0.00172717	0.0487594
MSTRG.15860	-2.34312	2.55255	38.3619	7.13e-05	0.00956336
Zm00001d023873	-2.35134	4.1351	46.4048	3.08e-05	0.00582623
MSTRG.17416	-2.39978	0.526324	52.0356	1.83e-05	0.00435343
Zm00001d046668	-2.40973	0.585575	21.4733	0.000746105	0.0308579
Zm00001d052684	-2.4385	5.39875	28.3396	0.000253206	0.0180678
MSTRG.23467	-2.43975	1.67377	37.9916	7.43e-05	0.00971483
MSTRG.5876	-2.44104	1.15617	18.6361	0.00125364	0.0411193
Zm00001d026859	-2.44541	4.74221	32.0735	0.000152385	0.013769
MSTRG.5042	-2.45166	2.84051	58.7704	1.05e-05	0.00315874
Zm00001d047252	-2.47773	4.74037	42.3846	4.61e-05	0.0073877
Zm00001d023117	-2.48155	1.81554	19.8926	0.000990056	0.0359205
Zm00001d041827	-2.48592	1.59766	35.2071	0.00010295	0.011545
Zm00001d044579	-2.48604	3.12663	23.3846	0.000540031	0.0262525
Zm00001d029906	-2.49091	0.520199	30.5335	0.000186808	0.0155155
Zm00001d004626	-2.49929	5.87973	44.7421	3.63e-05	0.00635802
Zm00001d025247	-2.53078	5.34669	71.2761	4.22e-06	0.00234497
MSTRG.13512	-2.53087	0.00820983	17.1106	0.00169449	0.0482692
Zm00001d051472	-2.53093	-0.0361996	29.604	0.000212055	0.0168057
Zm00001d023869	-2.56747	5.61044	66.7633	5.75e-06	0.00258325
Zm00001d037210	-2.59427	1.81161	20.4837	0.000889101	0.0339967
Zm00001d041663	-2.59706	2.58679	17.0874	0.00170252	0.0484008
Zm00001d028754	-2.59765	1.2539	35.4912	9.95e-05	0.0112909
Zm00001d018617	-2.64585	0.0536911	23.1055	0.000565452	0.026783
Zm00001d009612	-2.69868	1.70984	60.8894	8.87e-06	0.00289317
Zm00001d040837	-2.73635	2.38465	20.3104	0.000917384	0.0345001
Zm00001d023450	-2.76918	5.81577	65.7723	6.17e-06	0.00258325
MSTRG.11353	-2.78129	-0.243334	26.1645	0.000348506	0.0210828
Zm00001d053225	-2.79022	-0.502308	26.6204	0.000325416	0.0202917
Zm00001d003142	-2.80264	0.510055	38.1354	7.31e-05	0.00969903
Zm00001d004452	-2.81557	3.81771	56.1907	1.29e-05	0.00356173
Zm00001d047090	-2.81821	3.96399	25.2093	0.000403495	0.0230868
Zm00001d007403	-2.82904	4.46288	21.5789	0.00073252	0.0307587
Zm00001d010459	-2.85516	1.10514	31.4591	0.000165131	0.0142404
Zm00001d016408	-2.86402	2.80755	55.7122	1.34e-05	0.00362489
Zm00001d040836	-2.87868	2.26481	18.9979	0.00117	0.0394401
Zm00001d029903	-2.94466	-0.966863	22.6942	0.00060556	0.0276051
Zm00001d011921	-2.96097	1.31246	24.9084	0.000422906	0.0237585
Zm00001d004309	-3.10221	0.589646	37.8367	7.56e-05	0.00979728
Zm00001d053234	-3.17791	4.75855	24.5967	0.000444194	0.0242649
Zm00001d049113	-3.24945	4.54427	27.6705	0.000278794	0.0188696
MSTRG.1444	-3.25767	1.17948	22.3277	0.000644165	0.0284234
Zm00001d048720	-3.39407	4.02787	62.8193	7.66e-06	0.00271835
MSTRG.1952	-3.40375	2.3642	28.3927	0.000251295	0.01805
Zm00001d043047	-3.41761	6.81086	35.6584	9.75e-05	0.0112015
MSTRG.5251	-3.48595	-1.1431	20.1308	0.000947822	0.0351012
Zm00001d038049	-3.52165	7.28323	25.2075	0.000403603	0.0230868
Zm00001d014971	-3.57471	0.514564	22.752	0.000599721	0.0275726
Zm00001d015715	-3.59066	3.65344	22.3689	0.000639684	0.0282696
MSTRG.29515	-3.625	0.243258	68.6409	5.04e-06	0.00255518
Zm00001d048643	-3.68459	2.72231	66.6269	5.81e-06	0.00258325
Zm00001d048719	-3.7643	1.47826	54.6754	1.46e-05	0.00377063
Zm00001d038019	-3.80181	1.78602	61.3912	8.54e-06	0.0028683
Zm00001d049625	-3.89694	-0.0253611	17.6131	0.00153148	0.0459143
Zm00001d032495	-3.91666	2.51164	24.7592	0.00043294	0.0238251
Zm00001d020887	-4.00224	2.46946	47.0615	2.89e-05	0.0056587
MSTRG.514	-4.15839	5.18003	29.1402	0.000226157	0.0171469
Zm00001d020921	-4.22029	6.35285	28.0766	0.000262916	0.0182382
Zm00001d023870	-4.24205	5.29229	139.512	1.53e-07	0.000481339
Zm00001d021337	-4.52835	0.498671	21.7184	0.000715017	0.0302332
Zm00001d020163	-4.577	-0.91361	18.4228	0.00130625	0.0421663
MSTRG.515	-4.72066	2.87718	17.33	0.00162092	0.0473135
Zm00001d003118	-4.74596	2.67619	34.0734	0.000777829	0.0314994
MSTRG.1450	-5.07263	-1.27845	19.1925	0.00112776	0.0387474
Zm00001d023872	-5.16219	-0.0244034	25.1398	0.000407882	0.0231912
MSTRG.926	-5.50659	-0.583907	26.7149	0.00032086	0.0202299
Zm00001d037153	-5.62462	2.43962	26.6924	0.000321938	0.0202528
Zm00001d029859	-5.71251	2.97695	55.0531	1.42e-05	0.00368648
MSTRG.3084	-5.82558	1.74422	39.5408	0.00015194	0.013769
Zm00001d025885	-7.34636	-1.21387	40.8234	0.000134987	0.0128941
Zm00001d021562	-7.86877	-0.611441	39.0532	0.000159062	0.0140153
Zm00001d000438	-7.86892	-0.566238	39.0977	0.000158396	0.014

## Sheet: Group III
FileS1.3. Significant differentially upregulated genes in mop1-1 mutant MS in comparison to Mop1 wildtype MS (126 DEGs).
Gene_id_v4	log2FC	log2CPM	F	PValue	FDR
MSTRG.3925	11.8499	2.24905	69.11	9.11e-06	0.00437956
MSTRG.11815	11.1125	1.82993	85.1779	3.62e-06	0.00277214
Zm00001d003140	10.6706	1.71602	141.667	2.61e-06	0.00227002
Zm00001d012392	10.1785	1.6223	112.097	6.24e-06	0.00361112
MSTRG.1119	10.0683	1.37007	70.1666	3.44e-05	0.0105956
MSTRG.10536	9.66483	0.629587	116.05	5.48e-06	0.00331086
MSTRG.23386	9.44763	0.729409	158.066	1.73e-06	0.00182059
MSTRG.24190	9.33083	0.875273	67.1943	1.03e-05	0.00478878
MSTRG.8284	9.17096	0.00491247	46.7225	0.000143201	0.0296561
MSTRG.8500	9.12861	0.156046	86.4229	1.62e-05	0.00658779
MSTRG.8283	9.11982	-0.130432	47.0438	0.000139877	0.0291808
Zm00001d023657	9.03412	0.558586	59.345	1.76e-05	0.00704006
MSTRG.7625	9.02575	-0.377687	92.7136	1.25e-05	0.00547714
Zm00001d025140	9.0251	0.00364138	103.384	8.41e-06	0.00421289
Zm00001d001823	8.85147	-0.150137	89.623	1.42e-05	0.00599158
Zm00001d003332	8.83069	0.0615583	82.2567	1.94e-05	0.00754242
MSTRG.8746	8.80575	-0.408142	68.4293	3.76e-05	0.0111248
MSTRG.16259	8.74999	-0.637807	52.6349	9.49e-05	0.0220002
MSTRG.29240	8.60851	-0.330509	33.9149	0.000176003	0.0336719
Zm00001d003304	8.50932	6.99759	171.58	5.32e-08	0.00030203
Zm00001d051324	8.44146	-0.401688	67.8838	3.87e-05	0.0113292
MSTRG.8348	8.42718	-0.178376	43.2828	0.000185835	0.0346876
Zm00001d037249	8.28555	-0.944568	54.9974	8.15e-05	0.0197539
MSTRG.14808	8.25807	-0.494765	64.9205	4.54e-05	0.0127549
MSTRG.21234	8.23786	1.06352	40.4628	5.65e-05	0.0147212
MSTRG.6540	8.21225	-0.507803	62.8111	5.11e-05	0.013927
MSTRG.26079	8.13139	-0.588673	39.5286	0.000252284	0.0433806
MSTRG.2303	8.11867	-0.566683	47.1173	0.000139131	0.0291808
Zm00001d030724	8.0099	-0.855141	43.5669	0.000181757	0.0341511
Zm00001d053305	7.93517	-0.831972	52.3675	9.66e-05	0.0221074
MSTRG.29222	7.75592	-1.02339	44.7067	0.00016648	0.0323519
MSTRG.18296	7.61475	-0.350922	38.8607	0.000102566	0.0230952
Zm00001d002952	7.57939	1.87472	44.5007	5.91e-05	0.0148502
MSTRG.27582	7.04881	-1.26011	31.234	0.000242277	0.0428984
Zm00001d003118	6.95785	2.67619	410.396	9.78e-09	9.25e-05
MSTRG.14064	6.93713	0.693843	111.962	4.63e-07	0.000773474
MSTRG.7951	6.60801	2.59997	70.1169	4.56e-06	0.00315408
Zm00001d002897	6.54435	1.29642	84.9676	7.74e-06	0.00412613
MSTRG.29221	6.2757	-0.285021	34.097	0.000117913	0.025734
Zm00001d033314	6.15455	2.49766	105.945	6.1e-07	0.000914467
MSTRG.3083	6.1228	2.76574	114.287	4.18e-07	0.000762629
MSTRG.29223	5.8149	0.628414	68.7074	1.82e-05	0.00715552
Zm00001d003186	5.81171	5.37739	90.874	1.3e-06	0.00167835
MSTRG.10421	5.60459	1.3688	46.0908	3.18e-05	0.0101227
MSTRG.3049	5.54356	0.73885	36.3088	9.03e-05	0.0215128
MSTRG.10422	5.49718	0.391154	44.7938	9.54e-05	0.0220002
MSTRG.1897	5.10826	0.122845	45.0465	3.52e-05	0.0106178
MSTRG.3084	5.0615	1.74422	139.709	9.92e-07	0.00135099
MSTRG.8531	5.04268	0.409725	72.7589	3.82e-06	0.00285232
MSTRG.8347	5.03524	3.12082	122.616	2.94e-07	0.000641448
Zm00001d003191	4.8074	4.36518	76.0628	3.09e-06	0.00243319
MSTRG.8938	4.74645	0.298911	36.722	8.6e-05	0.020679
Zm00001d023257	4.62179	0.374552	34.3909	0.000113713	0.0250098
MSTRG.8542	4.24672	0.144873	54.8879	1.44e-05	0.00599158
MSTRG.11564	4.22679	2.59484	45.3071	3.43e-05	0.0105956
Zm00001d021017	4.22657	0.385101	32.0887	0.000152083	0.0304008
Zm00001d003411	4.1542	4.45571	126.418	2.52e-07	0.000641448
Zm00001d002899	4.15301	6.01575	129.53	2.23e-07	0.000632517
Zm00001d018118	4.11179	1.18452	49.3408	2.34e-05	0.00837018
Zm00001d002979	3.89811	2.58455	62.6692	7.75e-06	0.00412613
Zm00001d047060	3.74158	3.73468	48.251	2.58e-05	0.00872954
Zm00001d006503	3.65376	0.64441	39.1761	6.51e-05	0.0161896
Zm00001d007287	3.59182	3.44513	113.65	4.3e-07	0.000762629
MSTRG.1701	3.5368	2.35789	87.3178	1.58e-06	0.00182059
MSTRG.20529	3.50687	3.82935	68.8954	4.96e-06	0.00319864
Zm00001d003003	3.50005	2.81398	57.8535	1.13e-05	0.00515209
MSTRG.15860	3.38239	2.55255	85.2085	1.78e-06	0.00182059
MSTRG.2542	3.3791	3.9362	65.9457	6.1e-06	0.003604
Zm00001d047900	3.32801	5.15826	78.1196	2.72e-06	0.00227002
MSTRG.7802	3.28893	0.880081	56.7096	1.24e-05	0.00547514
MSTRG.5649	3.28803	1.36455	49.1029	2.39e-05	0.00837018
MSTRG.14886	3.24589	2.45806	136.315	1.72e-07	0.000610743
MSTRG.2664	3.19457	1.71509	31.9549	0.000154751	0.0307034
MSTRG.28907	3.16307	0.570262	50.5356	2.1e-05	0.00782434
MSTRG.14786	3.15416	4.64405	33.8948	0.000120907	0.0259876
MSTRG.14903	3.09503	1.70236	45.4359	3.39e-05	0.0105956
MSTRG.28427	3.06703	1.89567	85.5939	1.74e-06	0.00182059
Zm00001d035222	3.06203	4.58471	78.9392	2.58e-06	0.00227002
MSTRG.11272	3.05431	2.98769	59.4732	9.9e-06	0.00468219
MSTRG.17708	3.0233	3.89104	27.4456	0.000288076	0.0475192
MSTRG.5024	2.93299	1.73003	85.0672	1.8e-06	0.00182059
MSTRG.18612	2.88223	1.38622	35.117	0.000104078	0.0232511
MSTRG.27083	2.87234	1.28315	30.9427	0.000176833	0.0336719
MSTRG.23277	2.85845	2.52411	54.9104	1.43e-05	0.00599158
Zm00001d003088	2.84705	3.62506	50.8108	2.04e-05	0.00774851
MSTRG.24345	2.782	2.84814	27.1052	0.000302828	0.0496638
MSTRG.8295	2.77276	1.65728	29.8951	0.000203737	0.0375352
MSTRG.23279	2.74351	2.94162	31.0934	0.00017332	0.0334519
MSTRG.1633	2.69976	1.40597	46.295	3.11e-05	0.0100371
Zm00001d012413	2.67432	1.87383	53.4288	1.63e-05	0.00658779
MSTRG.11959	2.63751	2.85156	70.9466	4.31e-06	0.00308169
Zm00001d023828	2.59811	2.91644	95.8809	1e-06	0.00135099
MSTRG.28906	2.55693	2.12979	40.7051	5.5e-05	0.0147212
Zm00001d029829	2.534	2.04744	37.5306	7.83e-05	0.0191559
MSTRG.23439	2.50966	3.62012	28.313	0.000254169	0.0434415
Zm00001d004446	2.46344	2.86872	57.1785	1.19e-05	0.00535395
MSTRG.18613	2.43369	2.34225	27.8044	0.000273434	0.0456345
Zm00001d032511	2.41976	0.785067	32.0851	0.000152154	0.0304008
MSTRG.1583	2.40265	2.5449	83.3792	1.98e-06	0.00187317
Zm00001d003167	2.33592	1.77824	67.542	5.44e-06	0.00331086
Zm00001d017068	2.30782	0.553083	43.0701	4.29e-05	0.0121817
MSTRG.30531	2.16899	1.41498	32.3077	0.000147834	0.0299595
Zm00001d040075	2.08418	4.35279	31.4387	0.000165577	0.0323519
MSTRG.25243	2.04283	1.01693	45.1759	3.47e-05	0.0105956
Zm00001d012387	2.01206	3.6723	49.0955	2.39e-05	0.00837018
Zm00001d002836	2.00557	3.5756	42.2343	4.68e-05	0.0130223
MSTRG.11619	1.9974	2.29512	43.4083	4.15e-05	0.0118859
Zm00001d009610	1.99353	1.66881	61.352	8.56e-06	0.00421289
Zm00001d034385	1.98551	2.80691	50.3023	2.14e-05	0.00788687
Zm00001d026431	1.95507	1.7559	50.7916	2.05e-05	0.00774851
Zm00001d033148	1.9234	3.11645	41.6839	4.96e-05	0.0136624
Zm00001d036616	1.83743	2.50136	28.997	0.000230732	0.0414325
Zm00001d016291	1.81551	1.63041	40.5047	5.62e-05	0.0147212
Zm00001d047882	1.78262	4.4199	105.87	6.12e-07	0.000914467
Zm00001d048635	1.76779	4.53694	36.242	9.1e-05	0.0215128
MSTRG.12071	1.53722	1.82781	32.7919	0.000138927	0.0291808
MSTRG.30532	1.52421	3.15865	33.5874	0.000125635	0.0268009
Zm00001d051088	1.35031	3.15	28.4279	0.00025004	0.043257
Zm00001d004620	1.34362	4.44641	32.422	0.000145672	0.0299492
Zm00001d002830	1.22814	3.75762	49.1578	2.38e-05	0.00837018
Zm00001d004843	1.19989	6.99372	28.4818	0.000248133	0.043257
Zm00001d012702	1.17183	4.45625	34.458	0.00011278	0.0249983
Zm00001d016160	1.12173	2.50168	28.0888	0.000262456	0.0441648
Zm00001d003395	1.08667	5.8606	35.533	9.9e-05	0.0224689
Zm00001d042658	1.06963	4.71881	48.6819	2.48e-05	0.00859054
Zm00001d043870	1.06813	4.3149	46.7453	2.98e-05	0.00972108

## Sheet: Group IV
FileS1.4. Significant differentially downregulated genes in mop1-1 mutant MS in comparison to Mop1 wildtype MS (47 DEGs).
Gene_id_v4	log2FC	log2CPM	F	PValue	FDR
Zm00001d003193	-0.979544	4.31721	30.0667	0.000199012	0.0369044
Zm00001d017279	-1.01598	5.24747	28.4686	0.000248599	0.043257
Zm00001d003268	-1.03675	3.7765	40.0419	5.91e-05	0.0148502
MSTRG.7766	-1.20286	3.58898	28.8664	0.000235001	0.0419337
Zm00001d026182	-1.26823	3.78111	40.37	5.71e-05	0.0147212
Zm00001d003352	-1.31556	3.97815	86.8185	1.63e-06	0.00182059
ENSRNA049477727	-1.3861	4.08727	31.6828	0.000160348	0.0315931
Zm00001d003151	-1.43193	2.74925	46.9372	2.93e-05	0.00972108
Zm00001d002993	-1.49189	4.77705	32.3552	0.00014693	0.0299595
Zm00001d005790	-1.51965	4.62283	70.8254	4.34e-06	0.00308169
Zm00001d003195	-1.62455	6.6716	40.5055	5.62e-05	0.0147212
Zm00001d044267	-1.63507	3.48898	62.4953	7.85e-06	0.00412613
Zm00001d003261	-1.70365	2.50165	28.1177	0.000261371	0.0441648
Zm00001d003125	-1.82023	2.61923	48.4645	2.53e-05	0.00866042
MSTRG.8943	-1.88514	1.41658	43.6155	4.06e-05	0.0117565
Zm00001d012335	-1.9469	3.17616	28.0725	0.000263071	0.0441648
Zm00001d003378	-1.95641	4.04456	157.143	8.35e-08	0.000394915
Zm00001d003196	-2.02349	2.04954	64.2347	6.9e-06	0.00391668
Zm00001d003102	-2.05151	1.84974	69.6101	4.72e-06	0.00318717
Zm00001d003155	-2.09575	3.53786	115.429	3.98e-07	0.000762629
Zm00001d003310	-2.15411	3.60381	46.8299	2.96e-05	0.00972108
Zm00001d003317	-2.17699	4.1347	29.6871	0.00020964	0.0378848
MSTRG.29515	-2.19639	0.243258	28.6167	0.000243432	0.0428984
Zm00001d052827	-2.2409	2.01365	27.6011	0.000281619	0.0467258
Zm00001d039139	-2.2663	1.51479	29.7323	0.00020834	0.0378848
Zm00001d011655	-2.42788	1.07234	76.1662	3.07e-06	0.00243319
Zm00001d027946	-2.55049	2.99499	35.9869	9.38e-05	0.0219888
MSTRG.7674	-2.68374	-0.306367	33.942	0.0001202	0.0259876
Zm00001d003381	-2.80914	5.30278	131.414	2.07e-07	0.000632517
Zm00001d002849	-2.99346	1.10832	62.4989	7.85e-06	0.00412613
MSTRG.2121	-3.01187	0.485057	38.6855	6.87e-05	0.0169509
ENSRNA049469740	-3.35132	2.64786	30.821	0.000179733	0.0339958
MSTRG.7441	-3.60629	3.91049	40.2588	5.78e-05	0.0147654
Zm00001d003086	-4.14763	1.01408	68.8804	4.96e-06	0.00319864
Zm00001d003114	-5.10331	1.72264	61.5558	8.43e-06	0.00421289
MSTRG.7542	-6.41005	0.793654	40.4405	5.66e-05	0.0147212
Zm00001d003143	-7.35142	-1.12341	36.3602	0.000206699	0.0378352
Zm00001d003312	-7.4509	0.959956	119.989	1.87e-06	0.00183265
MSTRG.7556	-8.44497	-0.535299	87.418	3.73e-05	0.0111248
MSTRG.7672	-9.60905	0.00784935	159.849	5.19e-06	0.00327368
MSTRG.7570	-9.6463	3.64624	263.838	5.7e-09	9.25e-05
Zm00001d003306	-9.95987	5.96595	252.903	7.12e-09	9.25e-05
MSTRG.7714	-10.3725	0.709841	194.186	2.72e-06	0.00227002
MSTRG.7781	-10.5058	1.57021	137.133	8.61e-06	0.00421289
Zm00001d003267	-11.6112	2.43194	188.988	2.77e-07	0.000641448
Zm00001d003128	-11.7941	2.47953	672.443	4.1e-08	0.000291156
MSTRG.7573	-11.9607	2.55684	518.96	9.91e-08	0.000401646

## Sheet: Group V
FileS1.5. Significant differentially upregulated genes in mop1-1 mutant in response to ABA (1511 DEGs).
Gene_id_v4	log2FC	log2CPM	F	PValue	FDR
MSTRG.7882	11.6697	2.3312	308.945	3.35e-08	5.29e-05
MSTRG.8344	11.5197	2.663	15.9188	0.00413786	0.0418238
MSTRG.24125	9.31686	-0.367177	25.5456	0.00103285	0.0185468
MSTRG.7192	9.21331	-0.349658	19.1762	0.00183458	0.0260041
Zm00001d031228	8.99738	-0.379534	33.824	0.000268549	0.00854179
Zm00001d035560	8.64611	0.0742842	23.4402	0.000956993	0.0178045
Zm00001d040113	8.31705	-0.621285	41.2932	0.000217871	0.0076503
MSTRG.6870	7.93815	3.06894	13.1305	0.00407525	0.0414787
MSTRG.7958	7.88659	3.71866	150.953	1.03e-07	9.79e-05
Zm00001d010010	7.82864	2.3948	35.695	9.71e-05	0.00483283
Zm00001d003717	7.69134	-1.1066	33.032	0.000292381	0.0089086
Zm00001d047261	7.4198	2.38322	30.2356	0.000274408	0.00865056
Zm00001d007143	7.39783	-1.49305	30.2409	0.000400009	0.0106464
MSTRG.30639	7.38284	-1.56352	48.3963	0.000126903	0.00564339
MSTRG.25818	7.34434	-2.17181	27.0378	0.00214956	0.0286735
MSTRG.8455	7.24757	-0.53455	16.1846	0.0030924	0.0355773
Zm00001d022376	7.0262	-1.37048	41.9799	0.000206083	0.00736759
Zm00001d022278	6.61246	-1.65683	20.0195	0.00215509	0.0286995
Zm00001d048694	6.52427	4.69899	61.5834	8.41e-06	0.0013044
Zm00001d047259	6.34583	3.70517	136.802	1.69e-07	0.00013329
Zm00001d027587	6.31645	0.103147	38.0618	7.37e-05	0.00420799
MSTRG.28644	5.94891	-0.364064	32.6847	0.000140843	0.00596513
MSTRG.21895	5.89384	1.14161	49.5678	2.29e-05	0.00233529
Zm00001d037730	5.89331	0.585127	46.3829	3.09e-05	0.00271115
MSTRG.20417	5.88938	2.12895	124.834	2.69e-07	0.000162115
Zm00001d027258	5.75569	3.25977	148.786	1.1e-07	9.88e-05
MSTRG.13594	5.72988	-0.72395	37.3911	0.000119684	0.00543308
MSTRG.1507	5.64684	3.27547	118.491	3.49e-07	0.000191025
Zm00001d033447	5.63425	4.87206	150.661	1.04e-07	9.79e-05
Zm00001d013494	5.54228	1.50201	68.5058	5.09e-06	0.000977238
MSTRG.23741	5.49651	-0.133454	40.8386	5.43e-05	0.00361514
MSTRG.23310	5.48188	0.745175	41.953	4.82e-05	0.0034066
MSTRG.20419	5.46112	1.81537	102.716	7.12e-07	0.000289814
Zm00001d009140	5.38618	1.20522	83.5331	1.96e-06	0.000551424
Zm00001d043709	5.34642	5.63179	127.049	2.46e-07	0.000151594
Zm00001d023859	5.30302	1.90328	18.7177	0.00123417	0.0204651
Zm00001d050055	5.22703	5.3995	101.791	7.44e-07	0.000296818
Zm00001d002473	5.19821	-1.04938	25.3391	0.000395449	0.0105725
Zm00001d013903	5.07258	3.6048	239.909	9.37e-09	3.67e-05
Zm00001d009718	4.94703	1.29821	32.1751	0.000150389	0.00618098
Zm00001d008983	4.93959	5.11593	196.744	2.63e-08	4.54e-05
Zm00001d048629	4.86706	-0.435418	21.5956	0.000730395	0.0149085
MSTRG.22338	4.82457	-0.899323	18.6332	0.00156662	0.0239895
Zm00001d044039	4.82215	-1.29787	12.1666	0.00516206	0.0482246
Zm00001d023945	4.81522	-0.744658	23.1281	0.000563343	0.0128157
Zm00001d004357	4.72178	-0.110102	23.7941	0.000505133	0.012147
Zm00001d045321	4.66446	5.51173	71.5453	4.14e-06	0.000860978
Zm00001d022944	4.64151	0.588783	66.2411	5.97e-06	0.00108689
Zm00001d048991	4.6341	3.78823	56.4173	1.26e-05	0.00163412
Zm00001d052537	4.51945	1.06046	25.8739	0.000364238	0.0101018
MSTRG.9974	4.43659	0.0581349	18.69	0.00124074	0.0205141
Zm00001d052963	4.42184	2.06356	153.745	9.34e-08	9.79e-05
MSTRG.23258	4.36332	3.67206	18.1101	0.00138824	0.0221525
Zm00001d052064	4.34006	2.3947	145.545	1.23e-07	0.000104033
Zm00001d036766	4.23816	-0.976843	12.9329	0.0042739	0.0427677
Zm00001d025229	4.23103	1.99988	81.8503	2.17e-06	0.000582445
Zm00001d032519	4.22211	4.13004	75.156	3.27e-06	0.000754402
Zm00001d019504	4.17726	1.88228	41.5245	5.04e-05	0.00351628
Zm00001d016255	4.16002	6.19998	123.503	2.83e-07	0.000167539
Zm00001d005284	4.11529	-1.16447	13.6867	0.00357224	0.0385403
Zm00001d017422	4.08818	4.303	270.28	5.03e-09	3.67e-05
Zm00001d050977	4.05426	-0.42237	25.9339	0.000360922	0.0100393
Zm00001d002952	4.02846	1.87472	94.0068	2.32e-06	0.000594105
Zm00001d045988	4.02833	0.875936	60.5716	9.09e-06	0.00137677
Zm00001d017648	4.01742	-0.462852	28.2668	0.000255851	0.00836129
MSTRG.21985	4.01502	2.32255	225.553	1.29e-08	3.67e-05
Zm00001d025549	4.00822	-1.4285	12.8812	0.0050379	0.0473609
Zm00001d044078	4.00759	3.82521	220.228	1.46e-08	3.67e-05
Zm00001d023443	3.99177	3.36257	247.202	8.02e-09	3.67e-05
Zm00001d032138	3.97284	5.18488	214.421	1.68e-08	3.67e-05
Zm00001d004442	3.96731	1.87251	108.71	5.37e-07	0.000241758
Zm00001d025055	3.94254	6.06207	89.0366	1.44e-06	0.000470811
Zm00001d007876	3.93789	-0.620827	33.2453	0.000131159	0.00576935
MSTRG.14319	3.93373	-0.99347	12.7176	0.00450368	0.044214
MSTRG.18772	3.93293	0.344114	16.3771	0.00197108	0.0272001
MSTRG.12921	3.92794	1.3409	84.2029	1.89e-06	0.000541144
Zm00001d032610	3.89062	-1.26023	13.2176	0.004666	0.0452439
MSTRG.7969	3.85352	6.43478	49.1921	2.37e-05	0.00237346
Zm00001d047639	3.8367	0.198188	26.0965	0.000352113	0.00988145
Zm00001d002360	3.83015	-0.860265	25.4619	0.000388008	0.0104347
Zm00001d017453	3.8195	1.49306	67.9957	5.27e-06	0.00099766
Zm00001d035505	3.76954	-0.173692	34.838	0.000107661	0.00509092
Zm00001d037894	3.76922	10.7189	100.37	7.98e-07	0.000309928
Zm00001d040613	3.72042	3.163	231.299	1.13e-08	3.67e-05
Zm00001d044142	3.70029	5.41804	226.489	1.27e-08	3.67e-05
MSTRG.1657	3.69514	0.0587514	12.2222	0.00509072	0.0476679
Zm00001d043730	3.67209	1.10346	71.4825	4.16e-06	0.000860978
Zm00001d020332	3.66709	4.37162	195.412	2.72e-08	4.54e-05
Zm00001d016846	3.63377	-0.544671	15.1497	0.00256409	0.0317124
Zm00001d001996	3.62716	3.53954	88.9681	1.44e-06	0.000470811
Zm00001d007341	3.6185	1.30342	29.6349	0.000211153	0.00747919
Zm00001d027924	3.61612	0.717779	14.9534	0.00267758	0.0325764
Zm00001d002161	3.57049	-0.17917	25.2113	0.000403369	0.0106757
MSTRG.23706	3.56361	1.49101	33.5087	0.000126881	0.00564339
Zm00001d020717	3.54892	7.8325	157.114	8.36e-08	9.12e-05
Zm00001d045883	3.48363	-0.0752905	52.8146	1.71e-05	0.00192189
Zm00001d002940	3.46344	4.30729	110.022	5.06e-07	0.00023672
Zm00001d025576	3.46107	-0.622451	12.7851	0.00443008	0.0438098
Zm00001d051877	3.44944	2.32236	25.346	0.000395026	0.0105725
Zm00001d006713	3.44153	-0.506997	48.2197	2.59e-05	0.0024762
Zm00001d020528	3.39317	0.580926	23.7025	0.000512698	0.012265
Zm00001d033612	3.35386	-1.00714	34.4643	0.000165256	0.00649398
Zm00001d004171	3.3529	0.141648	42.9979	4.33e-05	0.00322956
MSTRG.4857	3.30996	0.746401	45.527	3.36e-05	0.00283315
MSTRG.528	3.29028	0.0789325	15.8766	0.00219079	0.0290047
Zm00001d018191	3.28956	4.02039	46.845	2.95e-05	0.00265934
Zm00001d053815	3.24623	2.90732	61.596	8.41e-06	0.0013044
Zm00001d006813	3.22461	1.07041	40.893	5.39e-05	0.00361514
Zm00001d013844	3.22398	-0.800509	18.5912	0.00126449	0.0207257
MSTRG.7968	3.21558	7.6788	47.9437	2.66e-05	0.00249252
MSTRG.27907	3.20978	-0.939119	15.5803	0.00233462	0.0300907
Zm00001d020620	3.18482	2.10661	43.3853	4.16e-05	0.00322215
Zm00001d014083	3.15596	3.27617	52.2202	1.8e-05	0.0019848
Zm00001d044460	3.11393	0.845615	24.5892	0.000444724	0.0113265
Zm00001d003760	3.11171	5.86173	177.694	4.45e-08	5.73e-05
Zm00001d029366	3.10023	5.44073	40.5596	5.59e-05	0.00366655
MSTRG.25969	3.1001	0.283539	44.1238	3.86e-05	0.00311791
Zm00001d028574	3.08756	8.12159	84.6093	1.84e-06	0.000534781
Zm00001d046281	3.08636	3.34051	205.011	2.12e-08	4.3e-05
Zm00001d035079	3.06343	2.6259	82.2792	2.11e-06	0.000576316
Zm00001d019925	3.0523	2.41955	38.3017	7.17e-05	0.00413706
Zm00001d022524	3.01314	2.38606	83.8915	1.92e-06	0.00054547
MSTRG.29740	2.98805	1.49236	21.634	0.000725549	0.014863
Zm00001d003188	2.96835	3.16779	31.5751	0.000162631	0.00643286
Zm00001d033254	2.95952	3.27995	49.9508	2.21e-05	0.00228809
Zm00001d015310	2.9569	0.614758	12.3642	0.00491352	0.0467653
Zm00001d017065	2.94646	4.39269	174.734	4.85e-08	5.87e-05
Zm00001d012068	2.93372	2.87302	80.7702	2.31e-06	0.000594105
Zm00001d008872	2.91982	0.304195	31.2164	0.000170513	0.00659263
Zm00001d014744	2.9067	6.40471	112.395	4.55e-07	0.000218611
Zm00001d041656	2.88874	2.0561	46.4907	3.05e-05	0.00270004
Zm00001d025477	2.88194	2.49981	23.5479	0.000525775	0.0125145
Zm00001d025964	2.87795	6.20414	44.0139	3.9e-05	0.00313477
Zm00001d037724	2.86217	5.56498	62.6113	7.79e-06	0.00125581
MSTRG.26509	2.85994	2.35008	14.396	0.00303382	0.0351472
Zm00001d007395	2.85263	1.19921	41.9747	4.81e-05	0.0034066
Zm00001d012221	2.85138	2.10026	14.2576	0.00313089	0.0357929
Zm00001d001311	2.84899	0.0788246	14.2001	0.00317231	0.0360874
MSTRG.14411	2.79833	1.67623	13.5297	0.00370638	0.0391648
Zm00001d030498	2.78861	1.01597	60.6245	9.05e-06	0.00137677
Zm00001d017762	2.76965	5.93466	128.868	2.29e-07	0.000144241
Zm00001d029091	2.76826	6.38772	84.7524	1.83e-06	0.000534781
Zm00001d043180	2.7612	1.41631	40.5531	5.6e-05	0.00366655
MSTRG.13790	2.75653	-0.671036	23.7213	0.000511137	0.012238
Zm00001d011495	2.7432	2.46642	64.9317	6.56e-06	0.00112802
Zm00001d022211	2.7385	1.91882	58.2844	1.09e-05	0.00151278
Zm00001d032253	2.73437	3.07614	80.8595	2.3e-06	0.000594105
Zm00001d013501	2.73358	0.525924	21.1514	0.000789406	0.0157062
Zm00001d044864	2.72885	6.14059	41.8159	4.89e-05	0.00343515
MSTRG.16083	2.72331	5.27875	36.1291	9.22e-05	0.00468013
Zm00001d039394	2.7135	2.37273	20.2566	0.000926377	0.0174988
Zm00001d023800	2.7113	6.98418	128.938	2.28e-07	0.000144241
Zm00001d003191	2.71041	4.36518	54.9325	1.43e-05	0.00171269
Zm00001d033943	2.71002	4.01083	35.7554	9.64e-05	0.00481502
Zm00001d051526	2.70718	-0.184088	25.9416	0.000360497	0.0100393
Zm00001d044124	2.695	2.71761	39.4274	6.33e-05	0.00388847
Zm00001d010380	2.69332	7.89494	138.368	1.6e-07	0.00012941
MSTRG.11760	2.69229	0.551177	19.7726	0.00101217	0.0183825
Zm00001d000719	2.69193	4.34222	23.3649	0.000541774	0.0126356
Zm00001d004624	2.68558	3.08735	151.338	1.01e-07	9.79e-05
Zm00001d008793	2.67575	1.48046	26.9752	0.0003087	0.00921941
Zm00001d040120	2.66437	1.71432	28.1607	0.000259762	0.00840362
MSTRG.11979	2.65507	2.21236	55.2666	1.39e-05	0.00170415
Zm00001d011097	2.65187	3.28699	26.1657	0.000348441	0.009827
Zm00001d042886	2.64685	6.63077	201.462	2.32e-08	4.4e-05
Zm00001d038911	2.64432	4.92045	278.635	4.28e-09	3.67e-05
Zm00001d046824	2.64296	2.05036	21.2164	0.000780433	0.0155823
Zm00001d005748	2.63485	3.64948	49.1354	2.38e-05	0.00237346
Zm00001d053195	2.62283	3.53498	52.4461	1.77e-05	0.00196122
MSTRG.20794	2.62086	1.56672	22.1294	0.000666276	0.014185
Zm00001d022222	2.62063	0.897819	13.1083	0.00409701	0.0415962
Zm00001d010287	2.61849	1.19335	18.4856	0.0012905	0.0209898
Zm00001d002958	2.61734	2.90438	29.3331	0.000220161	0.00772113
Zm00001d033369	2.58532	3.39944	112.901	4.45e-07	0.000218611
Zm00001d014617	2.57193	11.7447	71.5394	4.14e-06	0.000860978
Zm00001d039482	2.57172	1.98901	27.7164	0.000276941	0.00866762
Zm00001d052958	2.56955	0.6379	15.4678	0.00239213	0.0304484
Zm00001d051424	2.56911	2.3404	69.939	4.61e-06	0.00093636
Zm00001d051340	2.56131	0.540809	34.1205	0.000117569	0.0053977
Zm00001d044748	2.55839	1.82672	75.8532	3.13e-06	0.000738293
Zm00001d022069	2.55368	6.45131	225.007	1.31e-08	3.67e-05
Zm00001d031878	2.55325	1.22591	17.4964	0.00156762	0.0239895
MSTRG.1656	2.55315	1.2177	43.5911	4.07e-05	0.00318421
Zm00001d042148	2.54525	4.04281	117.968	3.57e-07	0.000191025
Zm00001d019446	2.54408	1.35422	22.0095	0.000680076	0.0143758
Zm00001d048558	2.53582	5.37028	19.1789	0.00113064	0.0195573
Zm00001d010499	2.52302	2.90159	63.2357	7.43e-06	0.00122571
Zm00001d027332	2.51938	8.25963	56.6625	1.24e-05	0.00162102
Zm00001d033231	2.51684	5.66612	226.061	1.28e-08	3.67e-05
Zm00001d047260	2.50864	6.30346	108.816	5.34e-07	0.000241758
Zm00001d041844	2.49746	0.214186	13.8154	0.00346664	0.0378
Zm00001d011132	2.49722	6.51819	85.6271	1.74e-06	0.000530723
Zm00001d009382	2.49085	0.899514	34.0589	0.000118469	0.0053977
Zm00001d015053	2.48956	0.652364	18.5489	0.00127484	0.0207991
Zm00001d029835	2.4882	2.26896	113.649	4.3e-07	0.000218611
Zm00001d029717	2.48692	-0.297633	22.758	0.000599123	0.0133171
Zm00001d047994	2.47982	5.10106	173.94	4.96e-08	5.87e-05
Zm00001d010586	2.47855	4.48761	68.6638	5.04e-06	0.000977238
MSTRG.30190	2.47785	0.912147	14.2572	0.00313118	0.0357929
Zm00001d041964	2.47607	1.37949	21.3665	0.000760159	0.0152959
Zm00001d031749	2.45546	6.47785	118.238	3.53e-07	0.000191025
Zm00001d005609	2.44868	6.09069	99.2576	8.43e-07	0.000315759
Zm00001d008381	2.42988	1.05771	15.7536	0.00224916	0.0294341
Zm00001d023404	2.42428	1.64288	41.6204	4.99e-05	0.00349063
MSTRG.4915	2.4053	0.863012	14.5642	0.0029207	0.0344323
Zm00001d035000	2.39327	3.6914	102.878	7.06e-07	0.000289814
Zm00001d019163	2.38376	12.2416	43.2937	4.2e-05	0.00322215
Zm00001d036768	2.37334	5.23061	39.0739	6.58e-05	0.00396321
Zm00001d052063	2.3673	3.50178	32.8101	0.000138605	0.00593138
Zm00001d002939	2.3662	6.81115	31.1566	0.000171871	0.00661647
Zm00001d030086	2.36549	4.28974	64.0938	6.97e-06	0.00118485
Zm00001d034571	2.3618	-0.132725	17.4798	0.00157284	0.0240405
Zm00001d022245	2.35109	2.95862	37.9672	7.45e-05	0.0042219
Zm00001d039826	2.34295	3.2007	34.884	0.00010706	0.00507097
Zm00001d002899	2.3387	6.01575	72.5124	3.88e-06	0.00084093
MSTRG.23778	2.3307	1.76998	25.5348	0.000383671	0.0103376
Zm00001d018288	2.33003	0.424223	24.6227	0.000442366	0.0112952
Zm00001d050308	2.32469	2.62688	43.5604	4.08e-05	0.00318421
MSTRG.22163	2.32417	-0.0759345	15.4481	0.00240233	0.0305178
Zm00001d027755	2.31842	4.48569	218.15	1.54e-08	3.67e-05
Zm00001d012401	2.31265	5.47919	105.209	6.32e-07	0.000271569
Zm00001d010856	2.30943	1.32399	53.2113	1.66e-05	0.00189456
Zm00001d038891	2.30098	7.14639	39.4638	6.3e-05	0.00388847
Zm00001d038703	2.29272	4.53716	29.8781	0.000204211	0.00733403
Zm00001d018751	2.28649	1.47167	35.7157	9.69e-05	0.00482936
Zm00001d017696	2.28117	0.136139	17.0291	0.00172285	0.0250927
Zm00001d025018	2.26953	2.98795	13.1283	0.0040774	0.0414787
Zm00001d034978	2.25895	6.21181	113.117	4.4e-07	0.000218611
Zm00001d026414	2.25397	5.25526	106.39	5.98e-07	0.000262715
Zm00001d016128	2.2534	4.02783	36.4726	8.86e-05	0.00453508
Zm00001d021990	2.25007	-0.263232	15.7583	0.00224689	0.0294316
Zm00001d014055	2.23121	3.83578	75.5543	3.19e-06	0.000741517
Zm00001d051365	2.20973	0.336284	15.4164	0.00241895	0.0305813
Zm00001d014481	2.20569	1.90631	58.4202	1.08e-05	0.00150388
Zm00001d038846	2.20252	6.79856	60.458	9.17e-06	0.00137677
Zm00001d013003	2.20173	7.36889	23.3862	0.000539883	0.0126356
zma	2.19564	3.05565	85.1474	1.79e-06	0.00053414
MSTRG.11173	2.19138	3.74345	19.0027	0.00116894	0.0199301
Zm00001d050347	2.18648	3.85721	145.271	1.25e-07	0.000104033
Zm00001d034787	2.18315	0.0574489	18.1416	0.00137972	0.0220414
Zm00001d029432	2.18079	0.779373	16.6326	0.00186904	0.0263169
Zm00001d021059	2.17932	2.83227	62.8059	7.67e-06	0.00125161
Zm00001d006476	2.17648	0.661197	32.1675	0.000150538	0.00618098
Zm00001d034482	2.17565	0.200649	21.4956	0.000743214	0.0150082
Zm00001d023269	2.17545	-0.14391	15.8175	0.00221861	0.0292094
Zm00001d044301	2.17239	6.17393	27.9338	0.000268375	0.00854179
Zm00001d007718	2.17148	7.89511	17.0043	0.00173156	0.0252067
Zm00001d037453	2.16511	6.0199	86.0454	1.7e-06	0.000530723
Zm00001d012313	2.16379	5.46277	79.529	2.49e-06	0.000630904
Zm00001d021992	2.15762	-0.280248	16.1683	0.0020594	0.0279299
Zm00001d039735	2.15418	1.26645	28.1322	0.000260828	0.0084189
Zm00001d000691	2.14638	3.80607	177.927	4.42e-08	5.73e-05
Zm00001d002160	2.14621	2.24888	14.1055	0.0032418	0.0364058
Zm00001d032906	2.14265	1.66186	25.1224	0.000408985	0.0107641
Zm00001d047547	2.13882	2.63173	59.1866	1.01e-05	0.00145823
Zm00001d052961	2.13507	2.4141	31.5729	0.000162677	0.00643286
Zm00001d042862	2.13485	6.83472	118.041	3.56e-07	0.000191025
Zm00001d039065	2.13221	4.69135	68.486	5.1e-06	0.000977238
Zm00001d039077	2.12527	5.14765	36.4995	8.83e-05	0.00453406
Zm00001d033273	2.12	4.84381	28.7246	0.000239746	0.00811703
Zm00001d037610	2.11755	4.35154	78.7942	2.6e-06	0.000649613
Zm00001d020961	2.11141	1.61005	28.4172	0.000250423	0.00833497
Zm00001d042898	2.10922	5.03858	131.5	2.07e-07	0.000136299
Zm00001d051938	2.10574	1.91107	48.0035	2.65e-05	0.00249252
Zm00001d013281	2.10545	1.63261	25.8386	0.000366203	0.0101282
Zm00001d009626	2.1019	6.15532	102.615	7.15e-07	0.000289814
Zm00001d017033	2.09682	5.98195	30.6327	0.00018433	0.00691774
Zm00001d017968	2.09137	2.95784	49.1458	2.38e-05	0.00237346
Zm00001d038320	2.08122	1.30729	18.0257	0.0014114	0.0224338
Zm00001d039315	2.0798	0.506228	36.0636	9.29e-05	0.00470239
Zm00001d020100	2.07735	5.04085	37.2672	8.07e-05	0.00434622
Zm00001d019629	2.06409	8.56656	73.6584	3.6e-06	0.000792221
Zm00001d038913	2.05931	7.59753	62.6027	7.79e-06	0.00125581
Zm00001d044167	2.05684	4.44406	19.0419	0.00116029	0.019849
Zm00001d025803	2.05475	4.00851	28.4825	0.000248108	0.00829132
Zm00001d018178	2.04626	5.51177	109.88	5.09e-07	0.00023672
Zm00001d023700	2.04141	2.6637	32.9852	0.000135549	0.00587146
Zm00001d023529	2.03867	10.9617	65.9216	6.11e-06	0.00110377
MSTRG.14568	2.03237	4.29025	19.9851	0.000973387	0.0179798
Zm00001d012382	2.02876	0.594411	23.1651	0.000559902	0.0127882
MSTRG.1786	2.02321	-0.0074594	14.8259	0.00275444	0.0331055
Zm00001d012764	2.01995	1.59851	20.897	0.000825739	0.0162694
MSTRG.11280	2.01572	2.2998	33.0914	0.000133736	0.00582742
Zm00001d025859	2.0125	4.33689	134.264	1.86e-07	0.000135272
Zm00001d017547	2.01238	6.00192	30.0984	0.000198156	0.00720778
Zm00001d041787	2.00268	-0.343523	16.7329	0.00183072	0.0260041
Zm00001d045204	2.0009	5.05537	82.8439	2.04e-06	0.000562915
ENSRNA049461886	2.00082	3.44451	22.6299	0.000612128	0.01346
Zm00001d013212	1.99867	3.59969	57.1141	1.2e-05	0.00159186
Zm00001d035053	1.99459	0.134313	12.4319	0.00483173	0.0463128
Zm00001d049660	1.99075	4.3951	148.506	1.11e-07	9.88e-05
Zm00001d051908	1.98393	8.26021	93.0891	1.16e-06	0.000405049
Zm00001d048868	1.98369	4.72251	81.778	2.18e-06	0.000582445
Zm00001d028808	1.97168	4.44291	17.3236	0.00162298	0.0243895
Zm00001d017032	1.97162	6.06655	18.9276	0.00118572	0.0200144
Zm00001d004705	1.9681	5.40032	42.4024	4.6e-05	0.00332114
Zm00001d044075	1.9662	0.0818056	18.8626	0.00120048	0.0201244
Zm00001d037608	1.96367	2.1127	13.0443	0.00416055	0.0419579
Zm00001d012867	1.95713	2.91976	20.9162	0.000822938	0.0162367
Zm00001d051596	1.95591	1.2864	32.7758	0.000139213	0.00594842
Zm00001d008812	1.95344	6.10884	21.2058	0.000781881	0.0156002
Zm00001d037334	1.94588	1.29547	26.5495	0.000328886	0.00952159
Zm00001d038730	1.94492	2.04671	56.3947	1.27e-05	0.00163412
Zm00001d039919	1.93699	2.3319	57.4683	1.16e-05	0.00156898
Zm00001d033230	1.93393	1.19865	20.0155	0.000967981	0.0179689
Zm00001d018699	1.92573	3.20081	134.602	1.84e-07	0.000135272
Zm00001d018106	1.92525	6.41009	22.9194	0.000583197	0.0130906
Zm00001d032307	1.92037	4.61495	20.2374	0.000929605	0.0175248
Zm00001d027649	1.9201	3.06851	21.1433	0.000790541	0.0157177
Zm00001d004416	1.91861	-0.0643041	14.8252	0.00275489	0.0331055
Zm00001d052947	1.91401	2.39761	99.1903	8.46e-07	0.000315759
Zm00001d023294	1.90802	4.87644	13.9184	0.00338475	0.0373231
Zm00001d051584	1.90533	4.81727	215.442	1.64e-08	3.67e-05
Zm00001d026512	1.89993	0.507884	18.3948	0.00131337	0.0212655
Zm00001d010652	1.89721	4.43757	91.4948	1.26e-06	0.000430262
MSTRG.16082	1.8934	-0.092487	21.0679	0.000801127	0.0158948
Zm00001d009116	1.89019	2.47615	31.6704	0.000160609	0.00643286
Zm00001d042207	1.88402	2.90518	41.1787	5.23e-05	0.00359516
Zm00001d043263	1.88335	1.1305	38.3013	7.17e-05	0.00413706
Zm00001d011257	1.88233	0.814445	27.8222	0.000272733	0.00860732
Zm00001d028778	1.88175	2.42945	112.942	4.44e-07	0.000218611
Zm00001d039619	1.88094	3.23031	132.938	1.96e-07	0.000135895
Zm00001d002799	1.87979	5.4402	21.6954	0.00071788	0.0148129
Zm00001d031203	1.87784	7.59315	43.0448	4.3e-05	0.00322835
Zm00001d014517	1.87265	1.3383	12.6327	0.00459833	0.0448021
Zm00001d004506	1.87155	3.98445	34.6781	0.000109781	0.00516306
Zm00001d011639	1.8711	4.44209	33.8941	0.000120919	0.00545682
Zm00001d026182	1.86823	3.78111	101.543	7.53e-07	0.000296818
Zm00001d024798	1.86657	2.34816	24.4711	0.000453128	0.0114175
Zm00001d037769	1.86575	6.99463	45.842	3.25e-05	0.00278374
Zm00001d038358	1.85926	3.28604	64.5772	6.73e-06	0.00115054
MSTRG.3079	1.85759	0.906369	21.0211	0.000807776	0.0159932
Zm00001d052079	1.85526	5.70073	24.3241	0.000463858	0.011585
Zm00001d051194	1.85017	9.92188	38.6338	6.91e-05	0.00407823
Zm00001d002592	1.84792	3.82603	11.941	0.00546436	0.0499213
Zm00001d016076	1.84741	4.74532	24.1551	0.000476572	0.0118122
Zm00001d047883	1.84602	3.94456	24.7604	0.000432857	0.0111512
Zm00001d011968	1.84542	1.27509	26.3609	0.000338328	0.00966672
Zm00001d042274	1.84389	6.02403	118.452	3.5e-07	0.000191025
Zm00001d043992	1.83806	1.97931	52.9808	1.69e-05	0.00190952
Zm00001d008869	1.83077	4.23246	38.5012	7.01e-05	0.00410327
Zm00001d008173	1.82607	3.96835	34.2121	0.000116246	0.00536687
Zm00001d029550	1.82493	3.68557	20.7049	0.000854503	0.0166625
Zm00001d024572	1.82472	5.25095	74.6612	3.38e-06	0.000761072
Zm00001d049926	1.8229	3.9745	53.6502	1.59e-05	0.00184725
Zm00001d012285	1.82087	2.20383	15.7106	0.00227001	0.0296051
Zm00001d040659	1.81913	1.69812	27.9139	0.000269144	0.00854667
Zm00001d032144	1.81495	2.43635	22.9687	0.00057843	0.0130289
Zm00001d038526	1.81455	2.9552	76.2502	3.05e-06	0.000727433
Zm00001d043601	1.81042	6.91605	104.335	6.58e-07	0.000278836
Zm00001d024800	1.80211	1.1429	15.8692	0.00219425	0.0290369
Zm00001d012956	1.80192	1.79514	23.9265	0.000494426	0.0119801
Zm00001d037095	1.79727	4.33697	29.7174	0.000208768	0.00741323
Zm00001d028092	1.79571	1.73937	31.1278	0.000172529	0.00663277
Zm00001d041191	1.78871	5.09302	89.0722	1.44e-06	0.000470811
Zm00001d040979	1.78497	8.03091	45.1536	3.48e-05	0.00289605
Zm00001d011202	1.78409	5.4853	78.7601	2.61e-06	0.000649613
Zm00001d024160	1.78402	1.70221	32.6528	0.000141419	0.00596513
Zm00001d051048	1.78249	0.812511	21.3113	0.000767542	0.0154008
Zm00001d052639	1.78241	2.25388	32.0078	0.00015369	0.0062603
Zm00001d000002	1.78024	3.51671	59.4512	9.92e-06	0.0014506
Zm00001d027256	1.77959	1.23914	42.4634	4.57e-05	0.00331701
Zm00001d045264	1.77437	3.0258	50.7846	2.05e-05	0.00218503
Zm00001d021738	1.77204	1.97786	19.5375	0.00105724	0.018771
Zm00001d040026	1.77132	3.54352	23.5341	0.000526964	0.0125229
MSTRG.15919	1.77025	0.70912	37.6475	7.73e-05	0.00427463
Zm00001d040619	1.76927	2.1507	46.1951	3.14e-05	0.00273572
Zm00001d026670	1.76889	1.55899	39.4924	6.28e-05	0.00388847
Zm00001d036280	1.76627	3.23936	20.843	0.000833713	0.016347
Zm00001d014664	1.76426	4.8081	25.628	0.000378207	0.0102479
Zm00001d002744	1.75673	2.63217	40.8565	5.42e-05	0.00361514
Zm00001d013390	1.75457	5.06566	57.9308	1.12e-05	0.00154105
Zm00001d040029	1.74546	10.3308	35.4059	0.000100515	0.00492115
Zm00001d031848	1.74388	0.960887	19.6357	0.00103812	0.0185926
Zm00001d020133	1.74253	4.8565	178.1	4.39e-08	5.73e-05
Zm00001d043752	1.74182	4.48312	45.9584	3.22e-05	0.00277387
Zm00001d025864	1.74021	2.91056	25.1069	0.000409975	0.0107796
Zm00001d022210	1.73448	2.02352	17.7219	0.00149867	0.0233243
Zm00001d004095	1.7331	3.19964	48.363	2.56e-05	0.00246818
Zm00001d011269	1.73021	5.02421	132.572	1.98e-07	0.000135895
Zm00001d000203	1.7301	3.45466	15.7172	0.00226681	0.0295832
Zm00001d002904	1.72732	0.352252	17.6867	0.00150919	0.0234367
Zm00001d043549	1.72381	2.07613	31.9706	0.000154435	0.00627742
Zm00001d039464	1.72187	0.510962	14.5986	0.00289819	0.0342881
Zm00001d033592	1.72126	0.628282	14.4219	0.00301609	0.0350614
Zm00001d017619	1.72035	0.716912	19.4144	0.00108179	0.0190401
Zm00001d006158	1.7162	5.19823	112.751	4.47e-07	0.000218611
Zm00001d002351	1.71591	3.47272	22.5049	0.000625146	0.0136078
Zm00001d008808	1.71508	5.85317	27.9499	0.000267754	0.00853563
MSTRG.17461	1.71332	6.17759	41.0147	5.33e-05	0.00361445
Zm00001d044526	1.7131	3.4406	28.2882	0.000255068	0.00836129
Zm00001d033080	1.71297	0.589371	15.8851	0.00218684	0.0289795
Zm00001d043733	1.71258	1.64368	23.3783	0.000540583	0.0126356
Zm00001d011655	1.71014	1.07234	43.7635	4e-05	0.00318421
Zm00001d034783	1.70838	1.89445	17.1215	0.00169076	0.0248812
Zm00001d017989	1.70364	3.92881	39.7256	6.12e-05	0.00384746
Zm00001d032079	1.70312	4.63238	53.7652	1.58e-05	0.0018447
Zm00001d009503	1.6975	3.33337	56.8725	1.22e-05	0.00161583
Zm00001d033931	1.69483	7.38776	54.4286	1.49e-05	0.00177194
Zm00001d011461	1.69291	5.54688	21.6506	0.000723467	0.0148336
Zm00001d044109	1.69168	3.45981	60.864	8.89e-06	0.00136323
Zm00001d043612	1.68991	4.40247	67.2797	5.55e-06	0.00103521
Zm00001d013087	1.68675	1.17602	17.6094	0.00153261	0.0235938
Zm00001d029274	1.68664	1.89029	13.4925	0.00373897	0.0393187
Zm00001d034558	1.67966	8.11587	70.9792	4.3e-06	0.000884049
Zm00001d043060	1.67635	-0.213879	13.6726	0.00358402	0.0386198
Zm00001d000636	1.67436	4.16447	37.7637	7.63e-05	0.00427463
Zm00001d032295	1.66372	6.4187	32.8326	0.000138207	0.00592329
Zm00001d018682	1.65736	-0.244205	13.8348	0.00345102	0.0377312
Zm00001d023522	1.65615	3.86116	35.2413	0.000102526	0.00498946
Zm00001d051267	1.6508	2.62075	30.2549	0.000193982	0.0071188
Zm00001d051361	1.6464	0.782589	23.649	0.00051718	0.0123618
Zm00001d039944	1.6427	2.23065	14.3937	0.00303544	0.0351517
Zm00001d044069	1.64085	0.395404	15.2117	0.00252944	0.0314759
Zm00001d018857	1.6385	6.77797	20.6886	0.000857003	0.0166883
Zm00001d053817	1.63846	3.71355	39.3451	6.38e-05	0.00389945
Zm00001d010385	1.63735	2.75715	33.6386	0.000124833	0.00560333
Zm00001d048789	1.63718	5.0896	48.1477	2.61e-05	0.00248169
Zm00001d023168	1.63527	3.6137	36.4898	8.84e-05	0.00453406
Zm00001d018819	1.63078	2.11614	25.32	0.00039662	0.010586
Zm00001d049061	1.62359	3.66466	18.7432	0.00122815	0.0204011
Zm00001d027500	1.62137	0.713501	24.7306	0.000434898	0.0111564
Zm00001d003757	1.61518	7.09739	34.3331	0.000114525	0.00532674
Zm00001d010653	1.61489	2.85445	33.1022	0.000133553	0.00582742
Zm00001d052152	1.61469	1.97383	12.2894	0.00500594	0.047187
Zm00001d022204	1.61342	2.4898	42.1311	4.73e-05	0.00339055
Zm00001d020408	1.61195	2.36204	29.5395	0.000213953	0.00754152
Zm00001d048185	1.60993	3.4916	40.2975	5.75e-05	0.00370776
Zm00001d034417	1.60929	2.58226	35.3795	0.000100834	0.00492405
Zm00001d049218	1.60878	1.47234	43.2279	4.22e-05	0.00322215
Zm00001d034836	1.60646	6.21271	27.5646	0.000283118	0.00877154
Zm00001d008208	1.60633	3.92804	27.7399	0.000276	0.00866224
Zm00001d029619	1.60576	1.87193	24.2729	0.000467665	0.0116289
Zm00001d021803	1.60485	3.52614	53.6159	1.6e-05	0.00184725
Zm00001d047290	1.60256	5.49239	56.2426	1.28e-05	0.00163412
Zm00001d010410	1.60203	6.81973	47.9365	2.66e-05	0.00249252
Zm00001d045478	1.60172	8.40839	23.3215	0.000545651	0.0126356
Zm00001d042256	1.60128	0.903375	23.2899	0.000548503	0.0126356
Zm00001d029349	1.59858	1.16048	18.9879	0.00117223	0.0199301
Zm00001d031290	1.59838	6.57216	55.227	1.4e-05	0.00170415
Zm00001d012591	1.59758	6.11427	74.906	3.32e-06	0.000760384
Zm00001d044950	1.59045	2.42049	21.8314	0.000701214	0.0146393
Zm00001d036700	1.58935	4.28415	38.6295	6.91e-05	0.00407823
Zm00001d012022	1.58702	2.07135	26.5551	0.00032861	0.00952159
Zm00001d026072	1.58332	1.89757	28.5062	0.000247272	0.00827312
Zm00001d046961	1.58066	5.29219	30.5416	0.000186604	0.00695024
Zm00001d006688	1.57797	7.70196	73.6976	3.59e-06	0.000792221
Zm00001d037941	1.57788	4.0288	14.7652	0.00279199	0.0334243
Zm00001d043536	1.57784	6.51181	63.8067	7.12e-06	0.00119478
Zm00001d046952	1.57318	5.65745	61.7853	8.29e-06	0.00129943
Zm00001d021062	1.56877	0.48863	12.1946	0.00512599	0.0479191
Zm00001d039492	1.56683	6.15796	50.3686	2.13e-05	0.0022358
Zm00001d051420	1.56109	8.85731	26.6689	0.000323069	0.00944122
Zm00001d023664	1.56051	5.37148	30.9259	0.00017723	0.0067495
Zm00001d003116	1.55971	6.2157	55.8492	1.33e-05	0.00165672
Zm00001d043205	1.55529	5.70155	86.0025	1.7e-06	0.000530723
MSTRG.28467	1.55047	4.03198	18.1895	0.00136687	0.0219349
Zm00001d029806	1.55037	2.49439	13.5968	0.00364828	0.0389132
Zm00001d032686	1.55021	4.34194	25.6302	0.000378082	0.0102479
Zm00001d050893	1.54917	5.72617	35.2898	0.000101929	0.00496895
Zm00001d002326	1.54771	6.89599	48.5043	2.52e-05	0.0024509
Zm00001d038304	1.54726	4.48401	97.2796	9.31e-07	0.00033867
Zm00001d043734	1.5452	2.79199	48.2225	2.59e-05	0.0024762
Zm00001d018677	1.54348	4.91843	38.9568	6.67e-05	0.00399824
Zm00001d005798	1.5421	6.21193	24.6123	0.000443095	0.0112952
Zm00001d027455	1.54182	5.47075	60.0084	9.5e-06	0.00140919
MSTRG.18765	1.53787	3.0547	18.5244	0.00128087	0.020862
Zm00001d039148	1.53496	3.53918	46.9182	2.93e-05	0.00265761
Zm00001d040048	1.53172	1.81765	13.5149	0.00371928	0.0392426
Zm00001d047453	1.53106	0.193479	16.0302	0.0021204	0.0284606
Zm00001d027987	1.52789	4.79775	22.689	0.000606088	0.0133925
Zm00001d053293	1.52646	1.73328	37.3686	7.98e-05	0.00432032
Zm00001d004700	1.52628	5.79572	14.8967	0.00271143	0.0328234
Zm00001d000224	1.52571	5.60407	41.1324	5.26e-05	0.00359516
Zm00001d015356	1.52489	8.26162	37.074	8.26e-05	0.00441094
Zm00001d040784	1.52454	3.93941	33.3767	0.000129004	0.00571892
Zm00001d019936	1.52426	6.2118	22.0864	0.000671185	0.0142323
Zm00001d048201	1.52377	6.28222	48.0626	2.63e-05	0.00248779
Zm00001d015614	1.52103	7.41611	15.5049	0.00237294	0.0303266
Zm00001d050339	1.52025	5.52988	56.7284	1.23e-05	0.00161979
Zm00001d042940	1.51925	2.87871	32.6473	0.000141519	0.00596513
Zm00001d043596	1.51691	1.89505	23.9602	0.000491744	0.011945
Zm00001d001984	1.51316	2.96362	13.0586	0.00414626	0.0418491
Zm00001d038695	1.51145	3.63414	27.457	0.000287595	0.00883341
Zm00001d024762	1.50752	5.76394	69.1953	4.85e-06	0.000963084
Zm00001d029934	1.50224	3.37103	100.104	8.08e-07	0.000309928
Zm00001d038408	1.50075	2.85327	59.1841	1.01e-05	0.00145823
Zm00001d009090	1.49916	3.44979	81.1681	2.26e-06	0.000594105
Zm00001d001852	1.49631	2.89577	14.3285	0.00308069	0.0355018
Zm00001d020317	1.49593	4.25945	12.8598	0.00435034	0.0432473
Zm00001d019254	1.49432	3.56187	40.9266	5.38e-05	0.00361514
Zm00001d052268	1.48969	4.86045	52.2653	1.8e-05	0.00198468
Zm00001d012391	1.48957	4.18131	44.2397	3.81e-05	0.00309943
Zm00001d024771	1.48939	1.11603	13.8278	0.00345659	0.0377773
Zm00001d053269	1.48866	1.94707	13.2673	0.00394407	0.040588
Zm00001d043912	1.48405	4.80405	42.1562	4.72e-05	0.00339023
Zm00001d024778	1.48067	6.31822	46.0684	3.18e-05	0.00275271
Zm00001d003125	1.47988	2.61923	37.5359	7.83e-05	0.00427952
Zm00001d019704	1.47656	1.03221	15.8931	0.00218313	0.0289795
Zm00001d014097	1.47516	2.66086	51.5521	1.91e-05	0.00207287
Zm00001d047765	1.47465	6.54543	56.1306	1.3e-05	0.00164037
Zm00001d048521	1.473	4.05975	51.5579	1.91e-05	0.00207287
Zm00001d043782	1.46927	5.52416	28.517	0.000246895	0.00827025
Zm00001d052660	1.46708	5.14316	77.715	2.78e-06	0.000686828
Zm00001d018122	1.46599	4.70451	39.6953	6.14e-05	0.00384746
Zm00001d020828	1.46484	5.48335	132.191	2.01e-07	0.000135895
Zm00001d003186	1.46474	5.37739	13.6887	0.0035706	0.0385403
Zm00001d042637	1.45977	3.70966	59.0611	1.02e-05	0.00145823
Zm00001d045460	1.45931	3.39759	17.3002	0.00163068	0.0244574
Zm00001d053006	1.45652	2.86016	21.7242	0.000714307	0.0147763
Zm00001d017383	1.4522	3.2584	42.422	4.59e-05	0.00332114
Zm00001d027341	1.45182	3.14033	41.0819	5.29e-05	0.00359721
Zm00001d003966	1.45171	3.46223	18.6621	0.0012474	0.0205523
Zm00001d014325	1.44933	7.19227	40.163	5.84e-05	0.00373838
Zm00001d048393	1.4493	2.03154	40.265	5.77e-05	0.00370776
Zm00001d032745	1.44771	1.44889	14.3841	0.00304208	0.0352109
Zm00001d039241	1.44582	2.35179	18.9742	0.00117528	0.0199301
Zm00001d032069	1.44487	3.2909	37.2683	8.07e-05	0.00434622
Zm00001d029654	1.44276	4.21089	27.3066	0.000293992	0.00893056
Zm00001d027355	1.44176	6.68487	23.0521	0.00057048	0.012929
Zm00001d019259	1.44137	1.47332	23.7765	0.000506575	0.012147
Zm00001d026042	1.44079	4.94827	32.5845	0.000142662	0.00596513
Zm00001d031773	1.44053	2.14094	48.3133	2.57e-05	0.00247128
Zm00001d026308	1.43872	3.61659	22.5729	0.00061803	0.0135404
Zm00001d025099	1.43866	1.76533	13.6245	0.00362466	0.0388071
Zm00001d033636	1.43555	2.18095	35.4198	0.000100346	0.00492115
Zm00001d028692	1.4352	6.38682	45.9155	3.23e-05	0.00277704
Zm00001d022234	1.43417	3.93895	28.2599	0.000256102	0.00836129
Zm00001d002992	1.43281	4.67955	68.3676	5.14e-06	0.000978688
Zm00001d046299	1.43095	6.3992	61.2035	8.66e-06	0.00133544
Zm00001d025947	1.43089	3.13096	28.9633	0.000231827	0.00793415
Zm00001d042482	1.43051	6.32937	30.0027	0.00020076	0.00725804
Zm00001d052122	1.43018	3.46445	18.8214	0.00120994	0.020217
Zm00001d039914	1.42628	9.70606	23.5487	0.000525713	0.0125145
Zm00001d034643	1.42555	3.11474	13.7876	0.00348913	0.0379709
Zm00001d004220	1.42542	5.37945	45.4336	3.39e-05	0.00284226
Zm00001d004547	1.42339	1.03339	18.714	0.00123504	0.0204676
Zm00001d028931	1.42096	4.73733	76.7553	2.96e-06	0.000710655
Zm00001d050125	1.41899	5.60695	48.7039	2.48e-05	0.00242411
Zm00001d014258	1.41888	4.92782	26.8296	0.000315432	0.00930405
Zm00001d047814	1.41752	5.57468	65.0683	6.5e-06	0.00112802
Zm00001d016299	1.41645	4.65495	39.491	6.28e-05	0.00388847
Zm00001d051496	1.41536	3.27313	22.5192	0.000623641	0.0135975
Zm00001d017612	1.41524	4.01538	23.9211	0.000494859	0.0119801
Zm00001d030037	1.41422	1.20904	24.0656	0.000483469	0.0118682
MSTRG.28919	1.41369	0.735287	12.4489	0.00481138	0.0461776
Zm00001d003035	1.41363	3.62297	51.7631	1.88e-05	0.00205023
Zm00001d002136	1.41037	2.52787	23.3588	0.000542319	0.0126356
Zm00001d053734	1.40707	0.946384	11.9292	0.00548081	0.0499237
Zm00001d031189	1.40668	2.88154	25.0017	0.000416769	0.0108582
Zm00001d019228	1.40424	6.59701	17.1029	0.00169714	0.0249101
Zm00001d042826	1.40297	4.26012	29.5148	0.000214685	0.00755713
Zm00001d040190	1.40084	9.5132	63.9845	7.03e-06	0.0011873
Zm00001d009549	1.39894	2.03419	13.2017	0.00400637	0.0410357
Zm00001d026480	1.3983	1.32633	36.0386	9.32e-05	0.00470239
Zm00001d011193	1.39733	3.52975	17.7483	0.00149083	0.0232657
Zm00001d013836	1.39706	2.64794	34.3969	0.000113629	0.00530245
Zm00001d043318	1.39275	2.89027	25.0419	0.000414157	0.0108218
Zm00001d013222	1.39259	3.96661	25.6238	0.000378455	0.0102479
Zm00001d046909	1.39016	6.59796	33.5877	0.000125631	0.00561324
Zm00001d034085	1.39013	1.92054	29.0143	0.000230176	0.00790086
Zm00001d035134	1.38802	4.71151	35.7799	9.61e-05	0.00481502
Zm00001d027520	1.38771	7.4842	31.9256	0.000155342	0.00629933
Zm00001d002088	1.38533	0.836991	14.3726	0.00305001	0.0352628
Zm00001d001582	1.38449	5.99002	17.3611	0.00161078	0.0243052
Zm00001d027370	1.3844	4.24944	26.9204	0.000311212	0.0092749
Zm00001d034027	1.38336	3.81534	37.6035	7.77e-05	0.00427881
Zm00001d033256	1.38292	4.83402	22.9668	0.000578612	0.0130289
Zm00001d005841	1.38292	1.61177	14.3591	0.00305939	0.0353332
Zm00001d002020	1.38203	4.33048	77.5239	2.82e-06	0.000689037
Zm00001d005766	1.38162	4.42223	18.7593	0.00122437	0.020386
Zm00001d016924	1.38078	0.992737	16.438	0.00194618	0.0270937
Zm00001d037768	1.37964	3.75898	40.7887	5.46e-05	0.0036165
Zm00001d026029	1.37822	3.41292	35.1458	0.000103716	0.00502737
Zm00001d011126	1.37774	1.84442	15.5745	0.00233751	0.0300907
Zm00001d026126	1.37699	2.70572	31.0921	0.00017335	0.00665531
Zm00001d009497	1.37686	2.76753	30.8776	0.000178378	0.00677849
Zm00001d043202	1.3749	0.688851	12.294	0.00500016	0.0471624
Zm00001d016570	1.37221	2.00992	25.7176	0.000373047	0.01023
Zm00001d053049	1.37086	5.11486	56.0431	1.3e-05	0.00164489
Zm00001d041236	1.36822	6.96045	34.9217	0.000106571	0.00507097
Zm00001d011429	1.36725	5.55062	25.8376	0.00036626	0.0101282
Zm00001d029581	1.36585	0.185371	16.9916	0.00173608	0.0252595
Zm00001d021943	1.36583	1.85133	23.3309	0.000544814	0.0126356
Zm00001d002610	1.36576	3.3291	37.1364	8.2e-05	0.00439322
Zm00001d053262	1.36442	4.05444	14.847	0.00274154	0.0330428
Zm00001d047981	1.36093	4.09508	20.8838	0.000827678	0.0162863
Zm00001d043800	1.35903	5.13265	27.9905	0.000266191	0.00850494
Zm00001d048680	1.35778	6.87624	33.8902	0.000120976	0.00545682
MSTRG.12283	1.35538	2.59461	33.1997	0.000131917	0.00578476
Zm00001d004564	1.35188	7.17199	34.3749	0.000113938	0.00530811
Zm00001d051121	1.35029	3.3589	18.4564	0.00129779	0.0210797
MSTRG.14513	1.34809	0.565547	21.3122	0.000767413	0.0154008
Zm00001d047242	1.34647	2.23906	24.3861	0.000459298	0.0115218
Zm00001d033998	1.34385	0.343745	14.4798	0.00297683	0.0348714
Zm00001d049870	1.3428	3.37559	44.6595	3.66e-05	0.00302389
Zm00001d025654	1.34209	2.15205	31.5569	0.000163021	0.00643286
Zm00001d044259	1.33613	1.21046	17.0918	0.00170099	0.0249347
Zm00001d017112	1.33377	2.8842	18.3922	0.00131403	0.0212655
Zm00001d008528	1.33364	3.50016	28.6985	0.00024063	0.00812839
Zm00001d012362	1.33295	3.60414	37.1251	8.21e-05	0.00439322
Zm00001d048709	1.33234	8.60894	13.1474	0.00405877	0.041408
Zm00001d001862	1.33194	4.87025	21.6627	0.00072195	0.0148336
Zm00001d012128	1.33186	2.64719	49.1756	2.37e-05	0.00237346
MSTRG.8142	1.33132	2.19062	16.5519	0.00190058	0.0266419
Zm00001d037317	1.33114	1.51077	24.5206	0.000449585	0.011389
Zm00001d027041	1.33076	1.05955	16.1874	0.00205113	0.027889
Zm00001d046632	1.32683	6.43228	50.4675	2.11e-05	0.00222418
Zm00001d019411	1.32552	3.15611	23.3776	0.000540649	0.0126356
Zm00001d029620	1.32503	6.93378	43.1497	4.26e-05	0.00322215
Zm00001d015289	1.32329	3.49291	26.1888	0.000347229	0.00981183
Zm00001d005451	1.32256	5.98363	27.7284	0.000276463	0.00866719
Zm00001d021627	1.32216	4.46994	27.6022	0.000281576	0.00875013
Zm00001d029371	1.32085	4.76776	13.5161	0.00371824	0.0392426
Zm00001d047220	1.32061	4.72816	37.9272	7.48e-05	0.0042219
Zm00001d047685	1.31983	6.85283	43.1381	4.26e-05	0.00322215
Zm00001d039975	1.317	3.82414	72.3815	3.92e-06	0.000841803
Zm00001d024324	1.31525	4.71974	17.6062	0.00153359	0.023596
Zm00001d029163	1.31472	1.60145	12.4287	0.0048356	0.0463343
Zm00001d027894	1.3147	3.72505	25.7998	0.000368383	0.0101767
Zm00001d039495	1.31461	7.09011	15.8135	0.0022205	0.0292208
Zm00001d022581	1.31392	6.09255	27.356	0.000291873	0.00890433
Zm00001d038880	1.31276	6.51398	33.2743	0.000130679	0.00576765
Zm00001d012069	1.30848	5.84753	34.206	0.000116334	0.00536687
Zm00001d012515	1.30799	3.54464	42.6808	4.47e-05	0.00327627
Zm00001d003530	1.30776	4.27324	15.6021	0.00232363	0.0300073
Zm00001d034838	1.30539	3.48285	22.0183	0.000679053	0.014367
Zm00001d047931	1.30471	6.8429	23.7744	0.000506752	0.012147
Zm00001d041154	1.3043	3.2203	32.1519	0.000150843	0.00618456
Zm00001d017880	1.30394	3.80984	23.4329	0.000535769	0.0126356
Zm00001d039941	1.3036	7.29407	32.2212	0.000149495	0.00616494
Zm00001d015977	1.30214	2.76954	24.7914	0.000430753	0.0111204
Zm00001d003575	1.30154	1.54931	16.1299	0.00207613	0.0280897
Zm00001d040285	1.29617	2.48591	11.9268	0.00548412	0.0499237
Zm00001d002965	1.29503	5.47587	25.7765	0.000369699	0.0101767
Zm00001d012159	1.2939	3.03305	23.9209	0.000494878	0.0119801
Zm00001d007865	1.29326	6.51687	27.6636	0.000279073	0.00868511
Zm00001d015767	1.29101	4.92805	28.0766	0.000262918	0.00844793
Zm00001d010565	1.29008	3.17399	18.7526	0.00122596	0.0203886
Zm00001d026293	1.28988	3.16758	24.2829	0.000466917	0.0116289
Zm00001d002733	1.28813	3.57549	18.633	0.00125439	0.0206129
Zm00001d029922	1.28598	2.81041	16.7605	0.00182032	0.0259014
Zm00001d015806	1.28522	3.11715	19.175	0.00113148	0.0195573
Zm00001d025474	1.2844	5.46751	66.2263	5.98e-06	0.00108689
Zm00001d042598	1.28427	6.57831	42.7989	4.42e-05	0.00327103
Zm00001d005037	1.28137	4.15399	17.362	0.00161049	0.0243052
Zm00001d016720	1.28137	7.14727	33.9354	0.000120299	0.0054436
Zm00001d020607	1.28115	6.95705	36.8326	8.49e-05	0.00445546
Zm00001d034418	1.28016	2.23765	19.4306	0.00107852	0.0189943
Zm00001d028601	1.28	7.86948	64.9636	6.54e-06	0.00112802
Zm00001d021779	1.27948	1.56453	25.394	0.000392097	0.0105247
Zm00001d032461	1.27485	2.78703	32.6579	0.000141327	0.00596513
Zm00001d031267	1.27284	6.58841	49.7481	2.25e-05	0.00231381
Zm00001d008923	1.27231	4.7135	23.1516	0.000561161	0.0127882
Zm00001d023979	1.27041	3.43489	46.5505	3.04e-05	0.00269292
Zm00001d026060	1.27005	3.65262	15.536	0.00235705	0.0301915
MSTRG.26172	1.2699	1.1746	17.1685	0.0016747	0.0247723
Zm00001d039377	1.2689	0.720742	14.1709	0.00319358	0.0361888
MSTRG.28921	1.26736	1.26206	12.1432	0.00519249	0.0483529
Zm00001d036982	1.26676	2.53277	22.3407	0.000642752	0.0138246
Zm00001d042480	1.26602	5.11594	80.6728	2.32e-06	0.000594105
Zm00001d048925	1.26537	5.77048	36.9787	8.35e-05	0.00442665
Zm00001d036736	1.26525	3.09089	12.5676	0.0046725	0.045276
MSTRG.27199	1.26483	2.435	12.9517	0.00425449	0.0426231
Zm00001d051659	1.26414	5.84491	17.8118	0.0014722	0.0230571
Zm00001d010634	1.26357	1.38014	16.1773	0.00205548	0.0278963
Zm00001d026370	1.2627	6.23908	43.8062	3.98e-05	0.00318421
Zm00001d028696	1.26232	2.72202	16.968	0.00174445	0.0253552
Zm00001d030550	1.26216	3.59109	24.4858	0.00045207	0.0114066
Zm00001d007397	1.26152	1.14381	19.2497	0.0011157	0.0194319
Zm00001d000339	1.26057	4.83592	27.3936	0.000290274	0.00889379
Zm00001d045051	1.25941	4.92424	21.0118	0.000809113	0.0160085
MSTRG.13817	1.25594	0.679417	13.5771	0.00366525	0.0389892
Zm00001d000967	1.25211	4.1471	68.8133	4.98e-06	0.000976429
Zm00001d026447	1.25186	6.54443	26.1076	0.00035152	0.00987457
Zm00001d018965	1.25106	8.41157	30.6381	0.000184197	0.00691774
Zm00001d013907	1.25007	8.06653	13.6317	0.00361853	0.0387945
Zm00001d014491	1.24931	5.02008	15.4068	0.00242401	0.0306071
Zm00001d016851	1.24841	0.736254	12.8066	0.00440699	0.0436575
Zm00001d033483	1.24785	9.43834	40.269	5.77e-05	0.00370776
Zm00001d031543	1.24506	5.21279	19.9469	0.000980226	0.0180653
Zm00001d028962	1.24502	4.18247	56.243	1.28e-05	0.00163412
Zm00001d046644	1.24461	2.17039	37.9905	7.43e-05	0.0042219
Zm00001d048294	1.24307	2.152	13.2301	0.00397926	0.0408316
Zm00001d008730	1.24303	6.07363	41.0956	5.28e-05	0.00359721
Zm00001d043221	1.23534	2.41461	17.2925	0.0016332	0.0244574
Zm00001d014007	1.23421	4.07167	37.4123	7.94e-05	0.00430687
Zm00001d042117	1.23351	5.31601	75.7525	3.15e-06	0.000738293
Zm00001d027021	1.23101	6.98	35.5452	9.88e-05	0.00488595
Zm00001d016982	1.22943	6.38268	31.0124	0.000175197	0.00669904
Zm00001d038860	1.22723	6.50002	40.9272	5.38e-05	0.00361514
Zm00001d042899	1.22689	4.09885	39.7109	6.13e-05	0.00384746
Zm00001d022456	1.22606	7.18224	19.0235	0.00116435	0.0198885
Zm00001d022227	1.22411	4.88129	28.2129	0.000257829	0.0083694
Zm00001d052903	1.22287	5.40662	37.8515	7.55e-05	0.00425002
Zm00001d052375	1.22163	6.29437	25.054	0.000413377	0.0108218
Zm00001d007097	1.22116	7.19561	46.7549	2.98e-05	0.00267393
Zm00001d000840	1.22025	2.88438	16.7045	0.00184146	0.0260568
Zm00001d045230	1.2199	2.18294	13.6592	0.00359531	0.0386974
Zm00001d020457	1.21782	3.74115	36.3189	9.02e-05	0.0045971
Zm00001d048162	1.21633	3.27719	39.5647	6.23e-05	0.00388589
Zm00001d041567	1.21605	2.76848	22.6339	0.000611723	0.01346
Zm00001d034777	1.21604	4.17794	20.1173	0.000950156	0.017748
Zm00001d002999	1.21527	2.9095	16.0239	0.00212325	0.0284606
Zm00001d038991	1.21336	4.51505	36.7481	8.57e-05	0.00445546
Zm00001d042275	1.21198	7.97938	31.4423	0.000165499	0.00649451
Zm00001d048165	1.21147	6.5348	24.4004	0.000458255	0.011516
Zm00001d025967	1.20884	4.48021	12.8504	0.0043603	0.043316
Zm00001d013033	1.20875	3.75353	23.2069	0.000556054	0.0127253
Zm00001d014463	1.20828	6.92618	14.457	0.00299225	0.0349447
Zm00001d038167	1.20733	5.26667	49.3948	2.32e-05	0.00236409
Zm00001d048621	1.20704	5.31057	36.1333	9.22e-05	0.00468013
Zm00001d028118	1.20662	3.54224	28.2995	0.000254657	0.00836129
Zm00001d042948	1.20598	4.56054	27.3381	0.000292641	0.0089086
Zm00001d048901	1.20593	2.77629	21.9171	0.00069095	0.014532
Zm00001d029246	1.20397	4.31432	19.1411	0.00113873	0.0196044
Zm00001d009399	1.20338	2.29472	15.5539	0.00234793	0.0301469
Zm00001d017682	1.20319	5.91789	16.7193	0.00183583	0.0260041
Zm00001d050323	1.20105	6.45764	31.7502	0.00015894	0.00642371
Zm00001d015397	1.20045	5.20889	16.4217	0.0019528	0.0271233
Zm00001d037170	1.20003	3.60291	40.7508	5.48e-05	0.0036228
Zm00001d029056	1.19724	4.76863	16.0767	0.00209961	0.0283263
Zm00001d007015	1.19623	2.44404	23.3868	0.000539831	0.0126356
Zm00001d012005	1.19581	6.14395	15.1353	0.00257224	0.0317855
Zm00001d026322	1.19559	2.93553	19.9415	0.000981201	0.0180653
Zm00001d034713	1.19143	4.79872	37.646	7.73e-05	0.00427463
Zm00001d048962	1.1891	5.07192	31.0553	0.0001742	0.00667558
Zm00001d032899	1.18828	4.75147	19.945	0.000980565	0.0180653
Zm00001d049640	1.18639	2.67162	18.8952	0.00119306	0.0200748
Zm00001d013208	1.18335	3.68556	43.3227	4.18e-05	0.00322215
Zm00001d025360	1.18325	6.59933	15.6951	0.0022776	0.0296151
Zm00001d045885	1.18174	4.14051	16.89	0.00177255	0.0255542
Zm00001d025932	1.17191	4.07256	18.542	0.00127653	0.0208148
Zm00001d047995	1.17184	3.46333	28.396	0.000251177	0.00833497
Zm00001d030860	1.1714	2.83263	30.8505	0.000179026	0.00678146
Zm00001d025847	1.17114	6.31984	13.5056	0.00372744	0.0392704
Zm00001d019256	1.17025	3.69541	30.8081	0.000180043	0.00680183
Zm00001d008399	1.16846	3.98123	12.3096	0.00498082	0.0470808
Zm00001d012387	1.16838	3.6723	24.7539	0.000433304	0.0111512
Zm00001d052458	1.1683	5.13408	52.5543	1.75e-05	0.00195043
Zm00001d037057	1.16803	5.57667	46.6042	3.02e-05	0.00269292
Zm00001d020673	1.16626	3.8991	19.641	0.0010371	0.0185879
Zm00001d020636	1.16351	9.12762	23.992	0.000489233	0.0119366
Zm00001d029975	1.16189	3.84428	46.324	3.1e-05	0.00271115
Zm00001d031790	1.1616	5.66943	49.3328	2.34e-05	0.00236907
Zm00001d046801	1.16146	4.48944	22.125	0.000666771	0.014185
MSTRG.700	1.15971	5.0575	17.477	0.00157372	0.0240405
Zm00001d003897	1.15923	3.07453	21.7472	0.000711478	0.0147586
Zm00001d027991	1.15687	5.70127	25.6504	0.000376912	0.0102479
Zm00001d027443	1.15324	5.5337	17.2659	0.00164202	0.0244574
Zm00001d032636	1.15296	1.64399	13.2772	0.00393482	0.0405151
Zm00001d026452	1.1524	4.99846	30.0006	0.000200816	0.00725804
Zm00001d006016	1.15122	5.19654	20.3403	0.000912434	0.0173223
Zm00001d000071	1.15076	3.76268	27.9612	0.000267316	0.00853125
Zm00001d047209	1.14981	4.74553	22.5444	0.000620996	0.0135844
Zm00001d026028	1.14884	2.09793	15.0426	0.0026253	0.0322586
Zm00001d015777	1.14526	2.01525	33.6165	0.00012518	0.00560333
Zm00001d034388	1.14492	6.36713	12.0648	0.00529596	0.0490075
Zm00001d045570	1.14399	3.34331	12.6764	0.00454937	0.0444778
Zm00001d028282	1.14368	8.39556	14.1757	0.00319003	0.0361886
Zm00001d007420	1.14332	3.27563	14.55	0.00293009	0.0344805
Zm00001d021490	1.14125	2.29968	34.4267	0.000113214	0.00529423
Zm00001d026635	1.14026	2.44489	15.8976	0.00218099	0.0289696
Zm00001d016764	1.13822	3.18441	28.6978	0.000240654	0.00812839
Zm00001d043361	1.13698	3.28439	20.3346	0.000913371	0.0173223
Zm00001d006340	1.13637	5.94722	38.4007	7.09e-05	0.00413706
Zm00001d020496	1.13499	6.1768	24.6806	0.000438338	0.0112243
Zm00001d045667	1.13496	7.57947	32.2937	0.000148102	0.00612529
Zm00001d012338	1.13384	6.50745	55.7549	1.34e-05	0.00166237
Zm00001d017646	1.13275	1.85407	26.4236	0.000335155	0.00962452
Zm00001d038881	1.13186	2.49494	23.1528	0.000561043	0.0127882
Zm00001d050844	1.13177	4.06653	29.9174	0.000203116	0.0073132
Zm00001d005932	1.13135	3.66589	23.3163	0.000546118	0.0126356
Zm00001d038267	1.13072	5.61644	24.3704	0.000460449	0.0115303
Zm00001d042013	1.13054	3.24221	16.1558	0.00206485	0.0279904
Zm00001d014611	1.12942	6.34584	15.1498	0.00256402	0.0317124
Zm00001d038359	1.12884	3.12376	33.0316	0.000134755	0.00585491
Zm00001d003287	1.12872	1.59128	26.7748	0.000318014	0.00934994
Zm00001d006193	1.12722	4.07201	11.9412	0.00546405	0.0499213
Zm00001d011563	1.12566	4.55514	57.5404	1.15e-05	0.00156735
MSTRG.28774	1.1251	3.48643	46.6823	3e-05	0.00268415
Zm00001d040638	1.12474	3.83269	14.9569	0.00267548	0.0325648
Zm00001d048988	1.12462	4.24998	21.3145	0.00076711	0.0154008
Zm00001d044045	1.12363	5.57544	43.0615	4.3e-05	0.00322835
Zm00001d007280	1.12332	4.285	13.0266	0.00417831	0.0420678
Zm00001d009826	1.1229	2.50715	24.4932	0.000451541	0.0114066
Zm00001d030133	1.12163	4.46172	14.2758	0.0031179	0.0357418
Zm00001d014089	1.11998	0.862211	12.0625	0.00529904	0.0490081
Zm00001d046593	1.11976	6.79771	65.1552	6.45e-06	0.00112802
Zm00001d046554	1.11901	4.31851	30.5671	0.000185965	0.00694237
Zm00001d042721	1.1188	5.78934	29.219	0.000223683	0.00778691
Zm00001d015239	1.1188	5.8198	32.8959	0.000137098	0.00591149
Zm00001d047913	1.11729	4.71818	69.8822	4.63e-06	0.00093636
Zm00001d003671	1.11494	5.01596	71.9826	4.02e-06	0.000851432
Zm00001d017539	1.11349	3.86129	34.8865	0.000107028	0.00507097
Zm00001d020306	1.1123	4.71394	15.36	0.00244881	0.0308379
Zm00001d040567	1.11205	7.54654	47.5639	2.76e-05	0.00255636
Zm00001d037025	1.11194	5.33357	16.9484	0.00175146	0.0254011
Zm00001d006330	1.10947	5.87404	31.5625	0.0001629	0.00643286
Zm00001d039226	1.10753	1.10857	14.4104	0.00302393	0.0351043
Zm00001d022492	1.10612	4.00098	18.8173	0.00121089	0.020221
Zm00001d013572	1.1059	3.42181	30.7326	0.000181875	0.0068619
Zm00001d010493	1.10453	4.69846	55.1956	1.4e-05	0.00170415
Zm00001d002521	1.10434	1.5233	24.0033	0.000488343	0.0119366
Zm00001d002019	1.10407	4.00091	38.6769	6.88e-05	0.00407458
Zm00001d007153	1.10364	4.47053	18.4837	0.00129096	0.0209898
MSTRG.20320	1.1029	3.51808	17.2792	0.0016376	0.0244574
Zm00001d047418	1.10259	6.61765	21.569	0.000733781	0.0149346
Zm00001d033397	1.10251	2.49313	24.042	0.000485308	0.0118802
Zm00001d038412	1.10218	5.80122	28.2556	0.000256261	0.00836129
Zm00001d042596	1.10191	2.02819	24.5346	0.000448587	0.011389
Zm00001d041877	1.1006	3.45959	23.7996	0.000504681	0.012147
Zm00001d046073	1.09977	3.7472	40.3454	5.72e-05	0.00370776
Zm00001d049380	1.09723	5.08679	36.3573	8.98e-05	0.00458865
Zm00001d014608	1.09645	6.69451	22.6221	0.000612937	0.01346
Zm00001d011500	1.09059	5.00878	45.2952	3.43e-05	0.00286428
ENSRNA049477727	1.08978	4.08727	23.2696	0.000550332	0.0126634
Zm00001d002143	1.0875	2.56236	17.6915	0.00150774	0.023427
Zm00001d003275	1.08738	1.78299	27.5926	0.000281966	0.00875267
Zm00001d039488	1.08628	3.17939	23.2009	0.00055661	0.0127253
Zm00001d021573	1.08599	3.22673	13.6313	0.00361887	0.0387945
Zm00001d048460	1.08488	5.98519	22.5617	0.000619191	0.0135553
Zm00001d045063	1.08468	4.02719	31.6705	0.000160607	0.00643286
Zm00001d002584	1.08303	1.44489	15.5495	0.00235017	0.0301579
Zm00001d050728	1.08028	3.43037	27.3091	0.000293888	0.00893056
Zm00001d038907	1.07798	4.51072	13.1655	0.00404118	0.041273
Zm00001d020969	1.07794	4.50278	19.7018	0.0010255	0.0184733
Zm00001d010798	1.07735	4.91693	14.0493	0.00328397	0.0366389
Zm00001d019994	1.07709	4.84117	16.0198	0.00212509	0.0284669
Zm00001d025825	1.07648	0.600735	13.6054	0.00364094	0.0388495
Zm00001d014467	1.07627	7.59171	15.0067	0.0026462	0.0323899
Zm00001d049651	1.07576	3.80112	20.9038	0.000824742	0.016261
Zm00001d019049	1.07559	3.82368	19.6184	0.00104146	0.0186185
Zm00001d048611	1.0745	10.9645	21.7016	0.000717102	0.0148076
Zm00001d002172	1.07107	2.17983	23.2931	0.000548212	0.0126356
Zm00001d050266	1.06836	2.96815	20.9212	0.000822198	0.0162334
Zm00001d002283	1.06802	2.99956	35.4026	0.000100555	0.00492115
Zm00001d049171	1.06653	4.53862	40.8359	5.43e-05	0.00361514
Zm00001d023715	1.06615	4.00797	13.7829	0.00349293	0.0379709
Zm00001d047236	1.06582	1.52205	16.7289	0.00183223	0.0260041
Zm00001d011125	1.06498	4.24047	31.0489	0.000174348	0.00667558
Zm00001d053684	1.06496	11.3592	12.7438	0.00447498	0.0441001
Zm00001d025735	1.06403	5.28915	34.4229	0.000113266	0.00529423
Zm00001d025322	1.06334	3.65452	14.5566	0.00292571	0.0344575
Zm00001d024937	1.06245	2.38886	14.8975	0.00271096	0.0328234
Zm00001d021900	1.06091	3.47459	30.4121	0.000189895	0.00703727
Zm00001d007820	1.0609	4.83149	17.3183	0.00162474	0.024403
Zm00001d045042	1.05986	8.62929	36.8135	8.51e-05	0.00445546
Zm00001d034615	1.05844	4.17339	19.8087	0.00100547	0.0183216
Zm00001d016950	1.05741	5.39373	25.6004	0.000379814	0.0102532
Zm00001d031677	1.05657	9.32515	15.989	0.00213902	0.0285882
Zm00001d017874	1.05613	5.42865	36.8694	8.45e-05	0.00445546
Zm00001d015477	1.05463	7.91919	27.661	0.000279177	0.00868511
Zm00001d009118	1.05177	3.691	19.7699	0.00101268	0.0183825
Zm00001d042868	1.05172	4.91565	16.7343	0.00183018	0.0260041
Zm00001d033675	1.049	4.22298	25.0678	0.000412485	0.0108218
Zm00001d029209	1.04695	4.44808	37.4622	7.89e-05	0.00429042
Zm00001d040807	1.04652	5.29846	16.2732	0.00201445	0.0275809
Zm00001d025751	1.04647	3.07161	31.2381	0.000170024	0.00659006
Zm00001d006626	1.04624	6.5843	25.5497	0.000382789	0.0103237
Zm00001d020345	1.04556	6.01143	33.7913	0.000122475	0.00550693
Zm00001d015985	1.0455	4.77759	44.5436	3.7e-05	0.00304134
Zm00001d027325	1.0455	3.71157	37.8115	7.58e-05	0.00426098
Zm00001d043727	1.04504	4.19938	63.7386	7.16e-06	0.00119478
Zm00001d028293	1.04103	4.04321	36.7602	8.56e-05	0.00445546
Zm00001d051480	1.03922	2.3474	13.5709	0.00367059	0.0389892
Zm00001d009700	1.03652	7.58893	43.7236	4.02e-05	0.00318421
Zm00001d011198	1.03637	3.24784	24.4612	0.000453843	0.011418
Zm00001d009171	1.03632	0.799213	15.0057	0.00264678	0.0323899
Zm00001d016477	1.03605	3.49175	13.5086	0.00372484	0.0392574
Zm00001d042090	1.03582	5.2724	15.6468	0.00230139	0.0298287
Zm00001d040958	1.03491	3.19845	19.2312	0.00111957	0.0194754
Zm00001d029756	1.03218	4.15672	14.063	0.00327359	0.0365806
Zm00001d035166	1.0318	3.99884	23.4162	0.00053723	0.0126356
MSTRG.23411	1.03161	3.03966	40.2595	5.78e-05	0.00370776
Zm00001d032620	1.03077	4.31338	24.4929	0.000451564	0.0114066
Zm00001d038753	1.03033	3.42356	27.9971	0.00026594	0.00850494
Zm00001d028214	1.02787	4.53562	32.9879	0.000135503	0.00587146
Zm00001d026253	1.02773	2.45761	27.4035	0.00028985	0.00889042
Zm00001d052409	1.02756	6.1269	44.0956	3.87e-05	0.00311791
Zm00001d026026	1.02698	3.57563	20.6782	0.000858603	0.016708
Zm00001d031221	1.02565	3.56498	12.4738	0.00478193	0.046022
Zm00001d026368	1.02501	4.97448	30.4964	0.000187745	0.00697212
Zm00001d034732	1.02203	4.23492	20.5784	0.000874098	0.0169167
Zm00001d030557	1.02168	7.2886	28.9264	0.00023303	0.00794655
Zm00001d002128	1.02099	2.99481	14.8413	0.00274506	0.0330502
Zm00001d001774	1.02074	3.65905	20.5197	0.000883363	0.0170211
Zm00001d046210	1.01816	4.99085	27.8774	0.000270567	0.00856795
Zm00001d037745	1.01647	3.91296	22.2838	0.000648982	0.0139281
Zm00001d045610	1.01606	6.2779	15.6768	0.00228658	0.029691
Zm00001d039575	1.01558	6.45084	14.1539	0.003206	0.0362367
Zm00001d051415	1.01464	2.14795	19.368	0.0010912	0.0191207
Zm00001d012720	1.01433	3.73403	17.1359	0.0016858	0.024857
Zm00001d037228	1.01408	5.59264	12.155	0.00517713	0.0483255
Zm00001d028339	1.01273	4.49104	13.5928	0.00365175	0.0389209
Zm00001d040954	1.01236	4.28544	30.2885	0.0001931	0.00711119
Zm00001d010159	1.01103	5.3069	22.9389	0.000581311	0.0130586
Zm00001d053889	1.01067	6.21506	26.5805	0.000327366	0.00952159
Zm00001d007189	1.01057	2.95266	16.1853	0.00205205	0.027889
Zm00001d037939	1.01044	1.86803	15.4741	0.00238886	0.0304478
Zm00001d011487	1.0083	7.31247	35.6577	9.75e-05	0.00483747
Zm00001d023838	1.00825	3.94196	23.0057	0.000574885	0.0130069
Zm00001d016649	1.00798	2.15046	23.356	0.000542572	0.0126356
Zm00001d026540	1.00766	1.64165	13.2595	0.00395143	0.0406143
Zm00001d006573	1.00508	5.4853	21.1928	0.000783676	0.0156251
Zm00001d042026	1.0038	4.23151	25.6224	0.000378536	0.0102479
Zm00001d043411	1.00338	4.30263	17.6639	0.00151605	0.0234661
Zm00001d016248	1.00218	7.05241	21.6161	0.000727809	0.0148986
Zm00001d016873	1.00073	3.35922	25.8905	0.000363317	0.010096
Zm00001d052843	0.998673	2.96278	18.2155	0.00135995	0.0218857
Zm00001d045948	0.99811	5.01344	34.9373	0.000106368	0.00507097
Zm00001d029134	0.997405	1.66321	16.6331	0.00186883	0.0263169
Zm00001d011426	0.996139	4.68835	21.8559	0.000698253	0.0146205
Zm00001d045119	0.995532	1.16102	12.7992	0.0044149	0.0437054
Zm00001d010945	0.995363	5.67674	17.7945	0.00147724	0.0230922
Zm00001d045036	0.992396	2.93206	28.2659	0.000255882	0.00836129
MSTRG.8407	0.992249	2.38322	22.7641	0.000598508	0.0133171
Zm00001d010961	0.991091	5.38239	26.8956	0.000312358	0.0092988
Zm00001d017699	0.990985	5.936	12.3724	0.00490356	0.0467552
Zm00001d012600	0.990071	2.19252	12.2304	0.00508025	0.0476013
Zm00001d027854	0.989705	7.41687	14.1461	0.00321173	0.0362367
Zm00001d044686	0.988203	10.6173	24.3738	0.000460196	0.0115303
Zm00001d040422	0.987701	6.74391	28.6837	0.000241135	0.00813495
Zm00001d032873	0.986853	9.70203	26.2538	0.000343833	0.00976501
Zm00001d019531	0.986427	2.81549	14.4983	0.00296439	0.0347832
Zm00001d031554	0.984819	5.24295	13.3443	0.00387251	0.0401515
Zm00001d003833	0.984543	6.39546	27.1685	0.000300018	0.0090149
Zm00001d028368	0.983684	6.1344	20.6416	0.000864241	0.0167832
Zm00001d012015	0.983093	3.44737	21.8105	0.000703736	0.0146704
Zm00001d038593	0.983083	3.86112	14.3008	0.00310018	0.0356251
Zm00001d005898	0.982783	2.88121	19.7827	0.00101028	0.0183742
Zm00001d014625	0.982162	5.64787	36.0258	9.33e-05	0.00470239
Zm00001d052905	0.981693	4.86446	19.9325	0.000982823	0.0180834
Zm00001d015399	0.981535	5.25552	45.5102	3.36e-05	0.00283315
Zm00001d022571	0.98151	3.25761	23.5005	0.000529871	0.0125663
Zm00001d003457	0.980392	7.33795	31.5663	0.000162819	0.00643286
Zm00001d020612	0.980319	3.64042	25.3131	0.000397043	0.0105873
Zm00001d002782	0.979992	4.31435	27.7449	0.000275802	0.00866224
Zm00001d043117	0.978121	3.90417	28.2738	0.000255595	0.00836129
Zm00001d038165	0.977815	7.80665	19.0153	0.00116616	0.0199075
Zm00001d004019	0.977346	4.05013	39.3834	6.36e-05	0.00389581
Zm00001d021978	0.97546	3.78178	34.2776	0.000115311	0.00533704
Zm00001d052519	0.974787	3.78419	30.8737	0.000178469	0.00677849
Zm00001d028331	0.974717	4.1567	11.9264	0.00548471	0.0499237
Zm00001d023507	0.97466	4.0963	62.3102	7.96e-06	0.00127556
Zm00001d015517	0.972941	1.01064	13.2574	0.00395337	0.0406143
Zm00001d044365	0.969832	3.6126	26.842	0.000314853	0.00930405
Zm00001d042932	0.968971	3.09153	23.381	0.000540346	0.0126356
Zm00001d047621	0.96655	6.05019	14.8416	0.00274484	0.0330502
Zm00001d008727	0.965722	6.91959	30.2857	0.000193174	0.00711119
Zm00001d001192	0.965618	7.02335	23.7806	0.000506237	0.012147
Zm00001d011144	0.963754	8.45049	28.3324	0.000253464	0.00836129
Zm00001d020025	0.963015	3.82304	14.0184	0.00330745	0.0367618
Zm00001d005638	0.962921	4.60594	15.2308	0.00251889	0.0313861
Zm00001d021577	0.962828	5.46168	26.4803	0.000332315	0.0095915
Zm00001d010690	0.961451	5.26562	16.9882	0.00173726	0.0252638
Zm00001d029754	0.961215	2.84464	15.9411	0.0021609	0.0287431
Zm00001d009568	0.96101	3.0006	15.5598	0.00234497	0.030133
Zm00001d021690	0.960729	6.09018	12.4475	0.00481313	0.0461776
Zm00001d019117	0.960727	5.80978	34.0959	0.000117928	0.0053977
Zm00001d044159	0.959731	5.56903	31.212	0.000170612	0.00659263
Zm00001d012982	0.958737	6.61443	29.3069	0.000220965	0.00773977
Zm00001d023327	0.957191	2.35191	12.7228	0.00449794	0.0442035
Zm00001d048392	0.953803	3.37421	12.0327	0.00533896	0.0492127
Zm00001d019225	0.950916	5.5142	14.1443	0.00321304	0.0362367
Zm00001d040118	0.949288	3.26934	19.1553	0.00113569	0.0195758
Zm00001d035495	0.949162	1.83706	13.8049	0.00347506	0.0378627
Zm00001d041678	0.948985	1.57692	12.4662	0.00479086	0.0460455
Zm00001d030893	0.948875	4.89469	22.3637	0.000640247	0.0138058
Zm00001d002826	0.946172	3.64396	17.289	0.00163437	0.0244574
Zm00001d008153	0.945232	4.55004	21.3045	0.000768458	0.0154083
Zm00001d021414	0.945102	3.00434	14.0125	0.00331189	0.0367769
Zm00001d012381	0.944075	1.66098	14.2983	0.00310196	0.035628
Zm00001d025903	0.943269	4.69216	15.459	0.00239667	0.0304789
Zm00001d020773	0.941912	5.59958	32.7437	0.000139784	0.00595489
Zm00001d034525	0.940564	4.41841	42.6569	4.48e-05	0.00327627
Zm00001d039131	0.939152	6.51334	14.9869	0.00265777	0.0324329
Zm00001d008432	0.938466	5.25479	29.288	0.000221546	0.00775057
MSTRG.24181	0.938302	2.94758	13.9066	0.00339396	0.0373776
Zm00001d020811	0.937876	2.6748	16.849	0.00178748	0.0256912
Zm00001d017852	0.937112	5.34845	14.981	0.00266123	0.0324471
Zm00001d016016	0.935849	7.0654	17.7014	0.0015048	0.0234069
Zm00001d053816	0.934904	4.04047	22.6719	0.000607825	0.01341
Zm00001d012484	0.934869	1.49508	15.6985	0.00227595	0.0296071
Zm00001d032608	0.934663	8.08907	13.2764	0.00393556	0.0405151
Zm00001d005769	0.934415	2.84746	16.3737	0.00197248	0.0272063
Zm00001d028227	0.934208	4.90985	18.8842	0.00119555	0.0200948
Zm00001d048065	0.929112	6.0567	37.2012	8.13e-05	0.00437119
Zm00001d007113	0.928755	7.27322	23.949	0.000492637	0.0119565
Zm00001d007073	0.928284	7.40579	12.2553	0.00504871	0.0474154
Zm00001d053334	0.926777	5.77395	21.7894	0.000706308	0.0146885
Zm00001d037937	0.926361	5.25656	50.103	2.18e-05	0.00227278
Zm00001d033468	0.926081	5.57148	27.5076	0.000285479	0.00878979
Zm00001d012480	0.923985	3.5181	15.5166	0.00236696	0.0302911
Zm00001d024645	0.923041	2.7162	17.0576	0.00171286	0.0250243
MSTRG.16793	0.921849	6.2915	20.3001	0.000919103	0.0174077
Zm00001d020278	0.921293	3.26491	21.0459	0.000804239	0.0159454
MSTRG.16792	0.921001	6.29108	20.1916	0.000937378	0.0176128
Zm00001d010234	0.92039	4.8438	21.7437	0.000711899	0.0147586
Zm00001d034601	0.920178	8.10873	19.126	0.00114198	0.0196203
Zm00001d032250	0.919435	3.81964	33.5588	0.000126088	0.00562477
Zm00001d049954	0.919194	7.01304	26.3226	0.000340283	0.00970303
Zm00001d018076	0.919182	4.08138	25.9371	0.000360745	0.0100393
Zm00001d000500	0.916967	1.65588	13.1928	0.00401488	0.0410829
Zm00001d031555	0.916831	4.25924	22.1147	0.000667952	0.014185
Zm00001d030851	0.914661	5.04774	25.8483	0.00036566	0.0101282
Zm00001d035501	0.914262	5.23682	18.9922	0.00117127	0.0199301
Zm00001d014129	0.912336	3.86838	23.4097	0.000537805	0.0126356
Zm00001d013112	0.911796	1.92842	15.5398	0.00235513	0.0301806
Zm00001d052362	0.908521	2.12515	13.7232	0.00354189	0.0383407
Zm00001d039683	0.906825	2.60761	14.1669	0.00319644	0.0361888
Zm00001d013010	0.906777	3.93178	14.0733	0.00326589	0.0365234
Zm00001d040056	0.905593	4.57064	59.9547	9.54e-06	0.00140919
Zm00001d042279	0.905373	6.69074	25.9915	0.000357773	0.0100002
Zm00001d014953	0.904994	4.9852	21.6576	0.000722594	0.0148336
Zm00001d023677	0.904517	6.45339	32.0026	0.000153793	0.0062603
Zm00001d033167	0.904256	5.48305	41.1661	5.24e-05	0.00359516
Zm00001d035973	0.904092	4.39554	17.2304	0.00165384	0.0245449
Zm00001d049502	0.904089	6.37695	23.2193	0.000554921	0.0127175
Zm00001d014587	0.903101	3.3134	27.7128	0.000277088	0.00866762
MSTRG.17577	0.903001	3.33932	17.1537	0.00167972	0.0247955
Zm00001d034722	0.902822	2.79017	12.3183	0.00496995	0.0470587
Zm00001d043527	0.90279	4.54144	28.2831	0.000255254	0.00836129
Zm00001d025933	0.900966	3.41187	17.0825	0.0017042	0.0249621
Zm00001d045393	0.899988	3.15606	18.6221	0.00125701	0.0206388
Zm00001d032427	0.899056	3.22134	19.0032	0.00116883	0.0199301
Zm00001d013934	0.898795	6.93351	26.4594	0.000333357	0.00961179
Zm00001d052147	0.897869	3.50116	26.3077	0.000341052	0.00971518
Zm00001d039339	0.897765	2.35745	18.792	0.00121674	0.0202828
Zm00001d003212	0.897127	4.98969	36.5625	8.76e-05	0.00452834
Zm00001d027723	0.89709	5.79082	25.7186	0.000372988	0.01023
Zm00001d053452	0.895515	5.15803	24.0845	0.000482002	0.0118504
Zm00001d012415	0.894281	6.04314	13.9296	0.00337597	0.0372697
Zm00001d024049	0.894177	3.6429	20.6277	0.000866401	0.0168021
Zm00001d028941	0.894109	2.52479	12.6139	0.00461958	0.0449321
Zm00001d047362	0.892469	4.04475	42.8955	4.37e-05	0.00325522
Zm00001d043024	0.891145	1.98131	13.5507	0.00368804	0.0390383
Zm00001d020936	0.890882	4.61711	14.1434	0.0032137	0.0362367
Zm00001d017912	0.889494	2.89877	15.909	0.0021757	0.0289129
Zm00001d052343	0.889452	7.20516	14.8943	0.00271286	0.0328234
Zm00001d044994	0.889215	2.08936	20.5287	0.000881933	0.0170211
Zm00001d051564	0.887911	4.00531	29.808	0.000206185	0.00736759
Zm00001d034076	0.887623	6.04714	23.7835	0.000506002	0.012147
Zm00001d021131	0.885851	3.04211	13.9647	0.0033487	0.0370407
Zm00001d008987	0.885831	6.01035	31.6661	0.000160701	0.00643286
Zm00001d009330	0.885074	4.3019	32.4085	0.000145925	0.00606176
Zm00001d052231	0.88405	3.48792	24.6139	0.000442985	0.0112952
Zm00001d022424	0.883698	5.6324	15.705	0.00227277	0.0296065
Zm00001d035616	0.881553	5.79672	43.5931	4.07e-05	0.00318421
Zm00001d033837	0.880316	3.56235	39.7237	6.12e-05	0.00384746
Zm00001d042108	0.879418	5.46376	19.4864	0.00106736	0.0188797
Zm00001d002520	0.879064	4.48613	12.3115	0.00497845	0.0470808
Zm00001d041592	0.878407	4.71912	13.6172	0.00363085	0.0388076
Zm00001d041951	0.877598	2.73428	15.1133	0.0025847	0.0318979
Zm00001d027625	0.87708	6.54627	13.2866	0.00392596	0.040485
Zm00001d040581	0.876931	2.83506	27.1903	0.000299056	0.00900723
Zm00001d005019	0.876229	5.7554	33.9522	0.000120048	0.00544089
Zm00001d008324	0.876006	4.09437	39.1357	6.53e-05	0.00394449
Zm00001d011782	0.875617	2.36929	16.4404	0.00194521	0.0270935
Zm00001d035139	0.875074	4.75389	20.1933	0.000937098	0.0176128
Zm00001d002406	0.874434	2.80516	17.2505	0.00164713	0.0245057
Zm00001d027630	0.872821	5.71658	35.1029	0.000104255	0.00502961
Zm00001d005018	0.872606	7.73169	17.1661	0.00167553	0.0247723
MSTRG.687	0.871514	3.46594	14.4291	0.0030112	0.0350425
Zm00001d007469	0.871213	3.56979	23.2882	0.000548651	0.0126356
Zm00001d022367	0.868832	4.68539	29.7361	0.00020823	0.00741323
Zm00001d047553	0.868436	5.07439	28.4327	0.000249871	0.00833497
Zm00001d045728	0.868387	3.49279	18.805	0.00121373	0.0202446
Zm00001d042833	0.867162	5.64433	41.1751	5.23e-05	0.00359516
Zm00001d005920	0.867062	5.48003	20.3591	0.00090933	0.0173105
Zm00001d006331	0.864996	2.51958	15.2278	0.00252052	0.0313926
Zm00001d012263	0.862941	1.60612	14.7503	0.00280133	0.0335073
Zm00001d028776	0.862256	6.28427	22.7321	0.000601727	0.0133481
Zm00001d018325	0.862007	2.11665	13.9745	0.00334112	0.0369857
MSTRG.25255	0.861309	6.14524	16.4039	0.00196007	0.0271329
Zm00001d020670	0.861005	4.53532	12.96	0.00424596	0.0425664
Zm00001d027340	0.860818	4.56357	27.3621	0.000291614	0.00890433
Zm00001d046441	0.859337	2.19035	15.3523	0.00245291	0.0308569
Zm00001d035818	0.859053	5.21361	13.0926	0.00411251	0.0416671
Zm00001d038734	0.857921	1.93973	20.5965	0.000871263	0.0168734
Zm00001d032597	0.857484	4.21386	15.3019	0.00248004	0.0310656
Zm00001d046274	0.857197	1.35901	13.3519	0.0038655	0.0400994
Zm00001d026200	0.856453	3.54304	34.3116	0.000114828	0.00532895
Zm00001d018725	0.856398	5.05096	18.209	0.00136166	0.0218902
Zm00001d039155	0.855875	2.63147	17.2847	0.0016358	0.0244574
Zm00001d047403	0.853384	2.30399	15.3464	0.00245608	0.0308708
Zm00001d028949	0.853367	7.23476	22.066	0.000673528	0.0142714
Zm00001d029738	0.851792	3.93264	15.5003	0.00237532	0.0303297
Zm00001d047813	0.850051	3.61366	16.8556	0.00178509	0.0256699
Zm00001d044189	0.848872	4.42046	34.9636	0.000106029	0.00507097
Zm00001d004138	0.848463	5.46535	16.2679	0.00201668	0.0275809
Zm00001d051047	0.848293	4.43831	22.1151	0.000667906	0.014185
Zm00001d025940	0.848069	1.70261	12.5681	0.00467191	0.045276
Zm00001d053939	0.847847	6.98037	25.7037	0.000373841	0.01023
Zm00001d028966	0.847691	3.90172	18.9157	0.00118841	0.0200341
Zm00001d047235	0.847627	4.69234	18.9006	0.00119183	0.0200748
Zm00001d003830	0.846971	6.0535	15.7348	0.00225824	0.0295121
Zm00001d004006	0.845857	6.44088	13.9053	0.00339497	0.0373776
Zm00001d042654	0.845795	4.98064	17.4522	0.00158156	0.0241117
Zm00001d033929	0.845111	5.42485	14.3103	0.00309352	0.0355773
Zm00001d003213	0.844238	5.65541	12.6486	0.00458041	0.0446672
Zm00001d038843	0.843505	5.39624	15.3521	0.00245303	0.0308569
Zm00001d011119	0.843405	5.64379	18.859	0.00120131	0.0201244
Zm00001d009927	0.843387	3.94893	12.4464	0.00481437	0.0461776
Zm00001d005790	0.843164	4.62283	26.0324	0.000355556	0.00995839
Zm00001d018454	0.842629	7.69407	22.5813	0.000617153	0.0135316
Zm00001d025412	0.841301	4.04636	13.5737	0.00366815	0.0389892
Zm00001d002301	0.840857	4.67334	16.7886	0.00180983	0.0259014
Zm00001d051569	0.839903	2.1729	15.471	0.00239045	0.0304484
Zm00001d044093	0.838246	3.02601	21.2564	0.000774962	0.0155167
Zm00001d021318	0.837932	7.76971	16.6679	0.00185546	0.0261775
Zm00001d020380	0.837417	3.99948	15.4262	0.0024138	0.0305696
Zm00001d053786	0.837337	5.68551	35.599	9.82e-05	0.00486304
Zm00001d043193	0.836969	3.86978	17.3992	0.00159849	0.0242266
Zm00001d041056	0.83644	3.89714	29.1445	0.000226021	0.00782032
Zm00001d034191	0.835932	4.04559	19.7488	0.00101664	0.0184189
Zm00001d020367	0.835729	3.15737	19.8748	0.000993297	0.0181904
Zm00001d002021	0.835471	5.71113	15.5283	0.00236095	0.0302279
Zm00001d020804	0.83517	7.55666	22.9549	0.000579761	0.0130404
Zm00001d029721	0.835034	3.22494	23.5585	0.000524869	0.0125139
Zm00001d004972	0.834554	3.6868	19.4694	0.00107074	0.0189277
Zm00001d022516	0.832777	9.09511	12.3037	0.00498807	0.0470953
Zm00001d024204	0.832561	3.36761	22.7337	0.000601568	0.0133481
Zm00001d044056	0.83198	2.85918	14.1473	0.00321085	0.0362367
Zm00001d018598	0.83104	5.06186	19.6965	0.0010265	0.0184796
Zm00001d045905	0.831037	2.69569	14.7382	0.00280891	0.0335414
Zm00001d036742	0.82975	2.92485	14.022	0.00330472	0.03676
Zm00001d034037	0.829631	5.9622	19.2585	0.00111385	0.0194117
Zm00001d014178	0.826712	4.86031	17.8189	0.00147014	0.0230571
Zm00001d035494	0.825608	4.49309	26.2137	0.000345924	0.00979497
Zm00001d009936	0.825419	3.56626	12.3524	0.00492795	0.0468552
Zm00001d042313	0.825141	3.27454	13.5489	0.00368963	0.0390383
Zm00001d037239	0.82511	7.95844	23.2535	0.000551797	0.0126869
Zm00001d005012	0.823955	2.39344	20.1534	0.000943925	0.0177016
Zm00001d038365	0.82204	4.88375	41.9149	4.84e-05	0.00340801
Zm00001d052988	0.821215	2.37536	12.3718	0.00490426	0.0467552
Zm00001d039512	0.820764	5.18924	14.4195	0.00301776	0.0350614
Zm00001d011668	0.819352	2.56992	17.0671	0.00170957	0.0249891
Zm00001d034572	0.819038	2.16388	17.3374	0.00161848	0.0243347
Zm00001d052170	0.818914	5.12774	22.4558	0.000630353	0.0136689
Zm00001d008919	0.818686	4.09617	15.2845	0.00248947	0.0311355
Zm00001d031182	0.816957	6.4659	24.1495	0.000476996	0.0118122
Zm00001d032184	0.816783	4.48303	18.7454	0.00122764	0.0204011
Zm00001d053308	0.816477	6.80596	13.4523	0.00377468	0.039504
Zm00001d033567	0.815676	3.62384	15.3794	0.0024385	0.0307626
Zm00001d034796	0.81352	3.83622	33.3879	0.000128822	0.00571892
Zm00001d053356	0.81349	3.64202	25.2127	0.000403282	0.0106757
Zm00001d040067	0.813394	7.16352	14.1164	0.00323373	0.0363933
Zm00001d022845	0.811633	2.24646	11.9543	0.00544598	0.0498591
Zm00001d016373	0.81062	6.70969	16.3604	0.00197797	0.027229
Zm00001d029785	0.810314	3.24987	20.1459	0.000945215	0.0177131
Zm00001d012913	0.809336	4.45717	12.6089	0.00462525	0.0449596
Zm00001d042192	0.808443	4.32607	16.2504	0.00202413	0.0276498
Zm00001d015811	0.808175	3.09157	18.4066	0.00131037	0.0212323
Zm00001d047044	0.80677	3.89508	12.4707	0.00478554	0.0460256
Zm00001d034636	0.805791	2.5373	19.218	0.00112236	0.0194914
Zm00001d052389	0.802699	5.19018	18.1246	0.00138432	0.0221023
Zm00001d002428	0.802464	4.85811	17.6701	0.00151419	0.023463
Zm00001d042319	0.801977	4.65407	14.2249	0.00315435	0.0359708
Zm00001d048695	0.801688	3.11727	23.2449	0.000552578	0.0126945
Zm00001d043850	0.800232	5.2214	32.3453	0.000147118	0.00610131
Zm00001d028752	0.798965	4.69849	13.5694	0.0036719	0.0389892
Zm00001d019712	0.798521	4.59617	22.1828	0.000660232	0.0140843
Zm00001d010201	0.798271	5.72996	13.4494	0.00377723	0.039516
Zm00001d035270	0.797696	4.82441	20.3378	0.000912836	0.0173223
Zm00001d037333	0.79692	5.58909	12.1478	0.00518649	0.0483255
Zm00001d021668	0.796718	7.25428	12.1494	0.00518444	0.0483255
Zm00001d039769	0.79642	3.5432	13.5332	0.0037033	0.0391471
Zm00001d018407	0.796159	3.365	15.1393	0.00256994	0.031771
Zm00001d049732	0.794625	9.06791	16.6403	0.00186608	0.0263013
Zm00001d046454	0.794175	5.77848	39.7613	6.1e-05	0.00384746
Zm00001d049450	0.793282	3.10607	17.2465	0.00164844	0.0245124
Zm00001d045491	0.79322	4.99386	16.2892	0.00200769	0.0275047
Zm00001d043038	0.792952	3.61328	16.014	0.00212771	0.0284887
Zm00001d016567	0.792512	3.23545	14.6791	0.0028463	0.0338881
Zm00001d036602	0.791545	2.84534	15.5022	0.00237436	0.0303297
Zm00001d049948	0.791507	4.40628	19.9937	0.000971854	0.0179689
Zm00001d018452	0.791123	5.61436	21.2521	0.000775547	0.0155175
Zm00001d048796	0.790162	3.86004	22.6251	0.000612621	0.01346
Zm00001d049088	0.789995	3.84649	26.3539	0.000338685	0.00966717
Zm00001d026398	0.789982	4.84545	14.4714	0.00298248	0.0349121
Zm00001d006682	0.789926	5.23384	22.4553	0.000630403	0.0136689
Zm00001d018822	0.789605	6.82983	14.8588	0.00273439	0.0330128
Zm00001d030020	0.789557	6.23506	21.5618	0.000734701	0.0149406
Zm00001d025991	0.789483	2.89021	27.5455	0.000283907	0.00877451
Zm00001d022420	0.787862	9.12442	12.1089	0.00523744	0.0486564
Zm00001d038784	0.787693	1.8936	13.1181	0.00408739	0.0415505
Zm00001d011195	0.786863	3.83289	14.6532	0.00286284	0.0339994
Zm00001d029872	0.786336	4.3009	11.9746	0.00541799	0.049683
Zm00001d011519	0.785922	3.24057	13.6429	0.00360907	0.0387719
Zm00001d021524	0.785717	4.2855	19.0541	0.00115762	0.0198333
Zm00001d047476	0.784798	4.94604	20.4894	0.000888198	0.0170614
Zm00001d017480	0.78439	3.85169	13.8719	0.00342139	0.0375519
Zm00001d006896	0.783191	4.86946	27.3626	0.000291589	0.00890433
Zm00001d010171	0.783158	5.55171	17.1092	0.00169499	0.0248992
Zm00001d036361	0.782734	3.03817	18.7634	0.00122342	0.0203822
Zm00001d048334	0.781238	5.58813	15.2969	0.00248277	0.0310861
Zm00001d034617	0.780801	4.32733	29.1863	0.000224707	0.00779388
Zm00001d045927	0.7807	4.32641	20.3885	0.000904513	0.0172581
Zm00001d019093	0.78049	4.46568	20.3514	0.000910595	0.0173159
Zm00001d016855	0.780481	5.52486	33.2549	0.000131	0.00576935
Zm00001d051419	0.779994	5.7405	12.3341	0.00495048	0.0469592
Zm00001d018200	0.779924	5.50601	26.4288	0.00033489	0.00962452
Zm00001d030516	0.778531	3.22153	17.0905	0.00170145	0.0249347
Zm00001d007185	0.77776	3.87169	23.0153	0.000573968	0.0129965
Zm00001d002928	0.776183	4.26438	31.6037	0.000162021	0.00643286
Zm00001d039732	0.77476	5.48167	26.3619	0.000338279	0.00966672
Zm00001d038529	0.773898	4.95756	46.0892	3.18e-05	0.00275271
Zm00001d043450	0.773758	2.93907	15.8505	0.00220305	0.0290856
Zm00001d039222	0.772777	1.43284	13.2883	0.00392445	0.040485
Zm00001d030953	0.7725	4.43138	20.9625	0.000816203	0.0161375
Zm00001d029886	0.772398	3.93304	26.156	0.000348953	0.00983166
Zm00001d026573	0.772374	6.56196	24.115	0.000479646	0.0118265
Zm00001d042362	0.77188	1.78321	15.0776	0.00260507	0.0320656
Zm00001d036831	0.770288	5.02866	15.3449	0.00245687	0.0308708
Zm00001d051684	0.769619	3.96808	21.921	0.000690481	0.014532
Zm00001d052357	0.768141	3.62244	16.3684	0.00197468	0.0272233
Zm00001d005395	0.768027	3.36428	11.9802	0.00541037	0.0496308
Zm00001d045136	0.767947	5.6433	29.0246	0.000229842	0.00790086
Zm00001d039643	0.767641	5.34252	14.0502	0.00328326	0.0366389
MSTRG.16107	0.765267	3.50635	18.5243	0.0012809	0.020862
Zm00001d053162	0.764958	3.94339	31.4682	0.000164935	0.00649033
Zm00001d011943	0.764588	3.34197	21.5114	0.000741177	0.0149884
Zm00001d023658	0.763368	4.99745	16.1763	0.00205594	0.0278963
Zm00001d047340	0.762854	5.94404	16.5302	0.00190914	0.0267223
Zm00001d033558	0.7624	5.01771	17.3622	0.00161044	0.0243052
Zm00001d024722	0.760471	4.61914	13.4879	0.00374301	0.0393327
Zm00001d003193	0.760298	4.31721	21.7864	0.000706675	0.0146885
Zm00001d018380	0.758169	4.58374	28.1451	0.000260345	0.00841287
Zm00001d011624	0.757157	4.95439	24.6745	0.00043876	0.011225
Zm00001d005539	0.756722	4.09312	22.5876	0.000616503	0.0135278
Zm00001d005622	0.756441	4.00482	12.5028	0.00474774	0.045755
Zm00001d029884	0.755628	4.38848	17.4389	0.00158579	0.0241546
Zm00001d044857	0.754179	3.35876	17.0313	0.00172207	0.0250927
Zm00001d018895	0.753534	4.38862	20.5176	0.000883692	0.0170211
Zm00001d053828	0.752961	7.2962	17.8751	0.00145389	0.0229038
Zm00001d042695	0.752069	4.30834	12.0561	0.00530762	0.0490506
Zm00001d006942	0.750079	3.5288	12.3203	0.00496749	0.0470587
Zm00001d019757	0.7497	5.30678	13.1056	0.00409966	0.0415962
Zm00001d025988	0.749608	3.04422	15.9527	0.0021556	0.0286995
Zm00001d022166	0.74947	3.61472	14.9205	0.00269718	0.0327867
Zm00001d027934	0.748502	6.31792	15.561	0.00234433	0.030133
Zm00001d002943	0.748089	7.85584	21.5993	0.000729935	0.0149085
Zm00001d042685	0.748085	4.21938	13.9033	0.00339657	0.0373808
Zm00001d032866	0.747882	6.772	19.1107	0.0011453	0.0196578
Zm00001d044382	0.747163	5.84172	13.4988	0.00373347	0.0393046
Zm00001d020555	0.745851	2.52192	12.1812	0.00514327	0.0480649
Zm00001d002579	0.744659	5.14458	15.4444	0.00240428	0.0305178
Zm00001d053087	0.743293	3.1686	24.5219	0.000449491	0.011389
Zm00001d013109	0.742964	4.35296	17.1617	0.001677	0.0247812
Zm00001d032268	0.74165	4.04707	15.9584	0.00215295	0.0286912
Zm00001d018983	0.738959	6.41869	15.7971	0.0022283	0.029284
Zm00001d025362	0.738899	2.52336	13.0915	0.00411355	0.0416671
Zm00001d002964	0.737928	4.8849	18.2086	0.00136177	0.0218902
Zm00001d042052	0.737494	3.54239	16.1403	0.0020716	0.0280569
Zm00001d003993	0.736755	3.79592	12.149	0.00518494	0.0483255
Zm00001d053753	0.735123	5.80491	33.2722	0.000130713	0.00576765
Zm00001d017468	0.734545	4.69754	29.249	0.000222751	0.007764
Zm00001d045155	0.734026	4.21086	24.7433	0.000434024	0.0111512
Zm00001d053102	0.733229	5.39416	32.131	0.000151251	0.00619232
Zm00001d006881	0.732766	3.54704	16.9505	0.00175073	0.0254011
Zm00001d045294	0.732048	4.41988	18.5675	0.00127027	0.0207845
Zm00001d045436	0.72927	4.3814	25.6717	0.000375678	0.0102468
Zm00001d039374	0.727487	2.0626	12.2385	0.00507001	0.0475525
Zm00001d039039	0.726868	2.61216	15.3131	0.00247398	0.0310041
Zm00001d040215	0.725047	5.56799	12.6888	0.00453549	0.0444341
Zm00001d041387	0.724889	4.90356	12.0888	0.00526409	0.0488081
Zm00001d017987	0.723613	6.69333	19.4627	0.00107208	0.0189329
Zm00001d006329	0.723577	4.89433	18.6946	0.00123965	0.020508
Zm00001d028576	0.723285	4.95192	19.6803	0.00102959	0.0185235
Zm00001d033228	0.722532	5.72408	14.2544	0.00313318	0.0358013
Zm00001d008665	0.722429	3.07487	14.7908	0.0027761	0.0332757
Zm00001d038971	0.722005	4.52866	23.3782	0.000540597	0.0126356
Zm00001d022434	0.721494	4.06621	22.2013	0.000658151	0.0140716
Zm00001d046112	0.721413	4.95875	16.421	0.00195308	0.0271233
Zm00001d006602	0.720728	5.37413	19.1494	0.00113695	0.0195857
Zm00001d012937	0.720519	2.89721	16.39	0.00196577	0.0271665
Zm00001d039166	0.72016	3.11569	17.8316	0.00146645	0.0230335
Zm00001d018799	0.71995	5.35743	24.9343	0.000421193	0.0109428
Zm00001d029378	0.718217	4.03967	14.0351	0.00329475	0.0366917
Zm00001d011331	0.718214	4.68193	28.7729	0.000238118	0.00807156
Zm00001d052173	0.717364	4.74463	16.2334	0.00203135	0.0277084
Zm00001d044478	0.717324	5.08507	23.3544	0.000542713	0.0126356
Zm00001d008417	0.717098	3.77564	13.2839	0.00392848	0.0404864
Zm00001d002405	0.716624	4.57506	25.7815	0.000369417	0.0101767
Zm00001d011401	0.712491	4.50386	26.5165	0.000330514	0.00954923
Zm00001d007763	0.70942	4.45391	15.3289	0.00246547	0.0309378
Zm00001d047474	0.709218	1.6836	13.4747	0.00375477	0.0394119
Zm00001d002315	0.707951	3.59401	12.5803	0.00465796	0.0452123
Zm00001d026460	0.706659	5.19576	12.7501	0.00446807	0.0440932
Zm00001d006057	0.706309	4.59706	19.992	0.000972164	0.0179689
Zm00001d049768	0.705099	6.19973	17.6777	0.00151191	0.0234511
Zm00001d007077	0.704704	4.22327	20.008	0.000969317	0.0179689
Zm00001d022184	0.704663	5.30015	23.3368	0.000544287	0.0126356
Zm00001d042857	0.704463	2.04733	13.872	0.00342131	0.0375519
Zm00001d045169	0.702002	2.53485	12.0548	0.00530926	0.0490506
Zm00001d022243	0.701063	3.82748	25.0547	0.00041333	0.0108218
Zm00001d053640	0.700666	3.48323	17.1113	0.00169425	0.0248992
Zm00001d005157	0.700552	4.92596	15.3928	0.00243138	0.0306864
Zm00001d025380	0.699226	2.93567	13.5792	0.00366342	0.0389892
Zm00001d038925	0.697037	4.6974	13.5492	0.00368936	0.0390383
Zm00001d027439	0.696982	4.76082	21.4065	0.000754861	0.0152109
Zm00001d045139	0.69514	8.1516	12.5058	0.00474422	0.0457366
Zm00001d033684	0.692774	3.85965	17.2735	0.00163949	0.0244574
Zm00001d035029	0.692344	5.09339	30.6147	0.000184777	0.0069198
Zm00001d016860	0.690179	4.88042	22.7113	0.000603822	0.0133761
Zm00001d046020	0.689197	3.29886	12.3072	0.0049838	0.0470843
Zm00001d010050	0.68882	3.6308	22.2758	0.000649872	0.0139366
Zm00001d025674	0.687525	3.65042	15.2922	0.00248529	0.0311039
Zm00001d020097	0.687156	3.09757	17.6266	0.00152737	0.0235642
Zm00001d043462	0.686735	4.16527	13.1908	0.00401677	0.0410829
Zm00001d026514	0.686734	3.96871	11.9359	0.00547149	0.0499237
Zm00001d020694	0.686285	5.04158	19.8052	0.0010061	0.0183216
Zm00001d028187	0.684812	5.62754	27.135	0.0003015	0.00904245
Zm00001d037760	0.683971	4.38298	12.2119	0.00510375	0.0477526
Zm00001d038745	0.682457	5.03563	16.2668	0.00201714	0.0275809
Zm00001d029865	0.680551	4.8688	14.576	0.00291295	0.0344216
Zm00001d048877	0.679968	4.19037	17.8283	0.00146739	0.0230335
Zm00001d032740	0.679338	5.4617	14.4026	0.00302931	0.0351345
Zm00001d052399	0.67842	6.5862	15.8434	0.00220637	0.0291024
Zm00001d049725	0.675675	3.00584	12.2488	0.00505692	0.0474768
Zm00001d027314	0.675123	4.46577	34.8056	0.000108086	0.00510252
Zm00001d014796	0.674994	7.32683	12.3924	0.00487925	0.0465795
Zm00001d031093	0.673634	2.33965	12.1494	0.00518437	0.0483255
Zm00001d011700	0.673617	4.37201	15.7629	0.00224472	0.0294167
Zm00001d012339	0.672547	6.3414	13.6433	0.00360872	0.0387719
Zm00001d047045	0.671775	4.17957	17.8294	0.00146709	0.0230335
Zm00001d050131	0.670948	4.63349	12.6665	0.0045604	0.0445397
Zm00001d039304	0.670794	5.6214	23.347	0.000543369	0.0126356
Zm00001d019217	0.670731	4.99215	20.0849	0.000955786	0.0178045
Zm00001d005698	0.670714	6.93928	13.8102	0.00347078	0.0378306
Zm00001d050380	0.670699	4.37814	17.621	0.00152908	0.0235746
Zm00001d046364	0.669258	4.2924	13.1442	0.00406186	0.0414218
Zm00001d010033	0.669138	5.78091	16.4503	0.00194118	0.027064
Zm00001d053066	0.667817	4.91631	20.5356	0.000880848	0.0170125
Zm00001d030009	0.667655	6.11367	25.7025	0.000373907	0.01023
Zm00001d019426	0.667248	4.5938	22.99	0.000576391	0.0130202
Zm00001d046378	0.666626	8.12422	14.5382	0.00293783	0.0345286
Zm00001d046660	0.666373	1.54414	11.9429	0.00546177	0.0499213
Zm00001d012581	0.666237	3.19404	11.9586	0.00544004	0.0498369
Zm00001d002075	0.665281	5.88949	22.5299	0.000622516	0.0135975
Zm00001d045516	0.664937	5.4896	16.3327	0.00198946	0.0273042
Zm00001d035514	0.664436	2.95741	12.069	0.0052904	0.048988
Zm00001d032710	0.66374	4.46464	20.5	0.000886507	0.0170455
Zm00001d035447	0.663039	5.98293	12.4623	0.00479547	0.0460742
Zm00001d052416	0.662951	5.86452	16.2978	0.00200407	0.0274683
Zm00001d044860	0.660729	2.40885	14.6202	0.00288413	0.0341909
Zm00001d006308	0.659478	3.46795	15.7551	0.00224845	0.0294341
Zm00001d009108	0.658778	4.09907	14.9909	0.00265541	0.0324329
Zm00001d052137	0.658054	3.03476	12.8798	0.00432928	0.0430681
Zm00001d041793	0.657803	3.61388	12.4	0.00487004	0.0465136
Zm00001d044495	0.656571	6.43798	17.6961	0.00150638	0.0234187
Zm00001d008389	0.653775	5.65464	17.5934	0.00153751	0.0236307
Zm00001d023596	0.653286	4.84759	15.6674	0.00229118	0.0297236
Zm00001d039639	0.652226	6.76122	12.7675	0.00444911	0.043952
Zm00001d048562	0.652015	2.9394	14.6916	0.00283832	0.0338214
Zm00001d008405	0.651975	4.62829	20.4857	0.000888792	0.0170614
Zm00001d020348	0.650824	4.89217	13.7618	0.00351014	0.0381277
Zm00001d049905	0.648905	3.72062	11.9419	0.00546315	0.0499213
Zm00001d036830	0.648109	3.4754	12.9046	0.00430333	0.0429154
Zm00001d011099	0.648014	6.12174	19.5677	0.00105132	0.0187062
Zm00001d028443	0.646475	2.87347	13.8626	0.00342881	0.0375646
Zm00001d045945	0.646229	5.57731	14.3584	0.00305984	0.0353332
Zm00001d043595	0.644192	4.35552	19.1325	0.00114058	0.0196179
Zm00001d035086	0.641425	6.29421	14.8338	0.00274961	0.0330839
Zm00001d029455	0.64069	3.94851	18.2003	0.00136399	0.0219134
Zm00001d001516	0.638904	3.88577	12.7856	0.00442962	0.0438098
Zm00001d008408	0.638507	4.48797	14.7241	0.00281779	0.0336333
Zm00001d021173	0.638312	3.70168	14.7438	0.00280538	0.0335349
Zm00001d049786	0.636462	5.23949	17.3467	0.00161545	0.0243277
Zm00001d051806	0.634429	5.02248	16.0994	0.00208956	0.0282176
Zm00001d048359	0.633393	4.67217	29.1656	0.000225356	0.00780684
Zm00001d005894	0.63334	5.72967	25.3546	0.000394499	0.0105691
Zm00001d037962	0.633113	7.2043	17.053	0.00171446	0.0250349
Zm00001d039710	0.632779	3.52818	18.9168	0.00118815	0.0200341
Zm00001d040011	0.63079	3.66571	18.0117	0.00141528	0.0224577
Zm00001d044713	0.629802	5.56311	19.8	0.00100707	0.0183275
Zm00001d006551	0.628975	4.93422	27.0204	0.000306642	0.00916759
Zm00001d022099	0.628736	5.08536	13.3108	0.00390341	0.0403747
Zm00001d028885	0.628372	3.95422	14.5673	0.00291868	0.0344323
Zm00001d051977	0.627836	5.38495	14.0418	0.00328962	0.0366775
Zm00001d014161	0.627148	3.3938	18.6635	0.00124706	0.0205523
Zm00001d015309	0.625199	3.52622	13.5555	0.00368393	0.0390383
Zm00001d052763	0.624057	3.71506	13.033	0.00417189	0.0420181
Zm00001d021592	0.622032	4.04868	15.4223	0.00241584	0.0305719
Zm00001d042625	0.621778	6.30076	13.3375	0.00387878	0.0401785
Zm00001d029416	0.62139	5.25011	15.6986	0.00227589	0.0296071
Zm00001d013927	0.620739	5.5037	20.1531	0.000943977	0.0177016
Zm00001d049867	0.619317	4.90702	19.4581	0.001073	0.0189329
Zm00001d016797	0.618953	4.70418	19.6329	0.00103868	0.0185926
Zm00001d027523	0.614257	4.1882	12.008	0.00537247	0.0494253
Zm00001d038862	0.614135	6.59316	13.522	0.0037131	0.039214
Zm00001d001057	0.614002	3.3803	14.597	0.00289924	0.0342881
Zm00001d027572	0.613568	4.68958	14.3827	0.00304304	0.0352109
Zm00001d051661	0.612942	4.18478	13.1087	0.00409661	0.0415962
Zm00001d053620	0.61253	4.43353	13.6148	0.00363292	0.0388076
Zm00001d039037	0.612167	5.31638	20.4984	0.000886762	0.0170455
Zm00001d011831	0.611945	4.4793	15.8852	0.00218679	0.0289795
MSTRG.3280	0.610722	5.00919	17.4007	0.001598	0.0242266
Zm00001d009578	0.608422	4.1025	15.1531	0.00256217	0.0317124
Zm00001d022542	0.60717	3.56606	16.355	0.0019802	0.0272465
Zm00001d038589	0.607013	4.13757	12.3106	0.00497957	0.0470808
MSTRG.1424	0.606813	5.4381	18.6988	0.00123865	0.0205035
Zm00001d010343	0.606059	4.10343	20.75	0.000847652	0.0165859
Zm00001d043459	0.605708	3.21399	13.4563	0.00377111	0.0394812
Zm00001d014911	0.603618	2.79126	12.3116	0.00497827	0.0470808
Zm00001d037181	0.602777	4.04723	12.1065	0.00524068	0.0486706
Zm00001d031532	0.602073	6.2543	12.5341	0.00471125	0.0455426
Zm00001d027055	0.599389	6.17249	14.2482	0.00313758	0.0358371
Zm00001d036454	0.59914	4.66479	16.3416	0.00198576	0.0272991
Zm00001d017959	0.599107	4.23732	17.8497	0.0014612	0.0229808
Zm00001d017772	0.597994	2.91417	14.1369	0.00321854	0.0362654
Zm00001d043056	0.596294	3.67499	20.5229	0.000882863	0.0170211
Zm00001d053354	0.593934	4.28288	13.6601	0.00359456	0.0386974
Zm00001d037505	0.59355	4.72224	13.0001	0.00420507	0.0422472
Zm00001d026288	0.592562	4.5184	14.439	0.00300442	0.0349924
Zm00001d005684	0.591848	4.34367	12.841	0.00437025	0.0433738
Zm00001d053650	0.591715	3.55972	13.4206	0.00380309	0.0396546
Zm00001d028535	0.591573	3.5017	12.5426	0.0047013	0.0454621
Zm00001d000029	0.59117	5.45886	13.969	0.00334537	0.0370183
Zm00001d050785	0.590579	3.56013	16.8839	0.00177474	0.0255729
Zm00001d042567	0.590286	3.93062	12.7396	0.0044795	0.0441044
Zm00001d026627	0.590024	3.54533	14.6828	0.0028439	0.0338737
Zm00001d008322	0.588794	3.9581	16.2013	0.00204514	0.0278296
Zm00001d020642	0.58741	6.76133	16.2198	0.00203719	0.0277348
Zm00001d038671	0.587121	4.0143	12.2678	0.00503293	0.0473357
Zm00001d021737	0.586033	3.60012	14.8529	0.00273798	0.0330232
Zm00001d002274	0.585432	3.38553	15.8604	0.00219838	0.0290781
Zm00001d053610	0.584608	4.82263	14.3079	0.00309522	0.0355824
Zm00001d005244	0.581747	3.97376	19.2385	0.00111805	0.0194609
Zm00001d014770	0.580886	3.81337	16.1795	0.00205452	0.0278963
Zm00001d020686	0.579983	6.19949	12.309	0.00498155	0.0470808
Zm00001d039848	0.577558	6.68081	16.0435	0.00211445	0.0284588
Zm00001d047754	0.576322	5.18756	17.2967	0.00163182	0.0244574
Zm00001d017379	0.573154	5.88872	17.5096	0.00156348	0.0239649
Zm00001d033502	0.570458	4.34164	15.6021	0.00232363	0.0300073
Zm00001d047772	0.568719	5.80527	15.9787	0.0021437	0.0286351
Zm00001d051193	0.568513	5.27908	11.9874	0.00540055	0.0495872
Zm00001d029177	0.56828	6.14317	15.8898	0.00218465	0.0289795
Zm00001d010492	0.568229	4.63244	17.0484	0.00171607	0.0250454
Zm00001d048190	0.567461	4.70579	20.0826	0.000956183	0.0178045
Zm00001d005627	0.565601	4.80053	22.3007	0.000647121	0.0138986
Zm00001d012170	0.565505	6.66885	13.4311	0.00379366	0.0396149
Zm00001d013220	0.5653	4.21152	12.7195	0.00450163	0.0442091
Zm00001d016731	0.563392	5.47837	15.6777	0.00228611	0.029691
Zm00001d007158	0.563318	6.07777	15.3305	0.00246461	0.0309378
Zm00001d038536	0.562808	3.893	13.3851	0.00383515	0.0398574
Zm00001d048763	0.560262	5.40853	15.9481	0.00215769	0.0287138
Zm00001d039401	0.560182	5.11718	17.549	0.00155121	0.0237898
Zm00001d023423	0.559121	5.22682	14.2831	0.00311272	0.0357258
Zm00001d017882	0.558852	4.8035	19.8121	0.00100484	0.0183216
Zm00001d003049	0.555499	5.03817	13.7213	0.00354347	0.038343
Zm00001d043261	0.555315	5.17386	15.0132	0.00264236	0.0323899
Zm00001d012277	0.553849	5.05338	13.1878	0.0040197	0.041098
Zm00001d028693	0.553635	6.63111	11.9405	0.0054651	0.0499213
Zm00001d027131	0.553449	3.51706	14.3399	0.00307275	0.0354391
Zm00001d005396	0.551128	3.73308	12.3431	0.00493937	0.0468954
Zm00001d005039	0.550936	4.44393	17.3718	0.00160733	0.0242958
Zm00001d049764	0.55056	5.86805	12.6519	0.00457668	0.0446555
Zm00001d015205	0.549512	6.29292	15.5596	0.00234505	0.030133
Zm00001d053977	0.545923	4.85063	13.6377	0.00361343	0.0387945
Zm00001d013362	0.543756	4.98783	16.758	0.00182128	0.0259014
Zm00001d040644	0.542364	4.16415	17.1677	0.00167496	0.0247723
Zm00001d029020	0.54185	4.27038	12.2944	0.00499965	0.0471624
Zm00001d008205	0.541268	4.26782	13.513	0.003721	0.0392462
Zm00001d016866	0.541142	5.2263	14.5709	0.00291629	0.0344323
Zm00001d052779	0.541024	4.23625	13.4934	0.00373822	0.0393187
Zm00001d051238	0.539763	3.57105	14.1237	0.00322828	0.0363496
Zm00001d003209	0.537926	4.70382	13.6259	0.00362349	0.0388071
Zm00001d009627	0.533856	4.8346	15.7925	0.00223053	0.0292849
Zm00001d039702	0.533181	4.60207	13.6903	0.00356921	0.0385403
Zm00001d038172	0.532574	4.83593	17.3522	0.00161369	0.024327
Zm00001d017119	0.532534	5.40129	13.2182	0.00399062	0.0409298
Zm00001d039768	0.531956	5.33591	13.4879	0.00374307	0.0393327
Zm00001d002538	0.530604	4.50644	16.4076	0.00195855	0.0271329
Zm00001d041474	0.530422	4.69437	13.7431	0.00352547	0.0382357
Zm00001d003836	0.527059	3.85346	13.7499	0.00351988	0.0381904
Zm00001d017042	0.526667	4.20991	13.2535	0.00395714	0.0406341
Zm00001d034404	0.525031	5.2774	14.5424	0.00293509	0.0345229
Zm00001d050837	0.523185	3.6872	14.1931	0.00317737	0.0360883
Zm00001d021805	0.519405	5.36724	18.9986	0.00116985	0.0199301
Zm00001d033906	0.516349	3.8939	13.6899	0.00356954	0.0385403
Zm00001d029750	0.51595	4.35698	13.9537	0.00335721	0.0371203
Zm00001d042627	0.515408	5.70864	13.4712	0.00375782	0.0394269
Zm00001d020771	0.515193	6.2189	13.4081	0.00381432	0.0397247
Zm00001d023576	0.51519	5.07498	16.7791	0.00181336	0.0259014
Zm00001d009554	0.513954	5.36464	13.6153	0.00363247	0.0388076
Zm00001d034090	0.513464	3.50858	12.4124	0.00485519	0.0464565
Zm00001d052185	0.511525	6.3626	12.4095	0.00485857	0.0464565
Zm00001d009645	0.508985	4.94609	11.9544	0.00544585	0.0498591
Zm00001d015148	0.507424	3.69693	12.1537	0.00517881	0.0483255
Zm00001d042507	0.502515	4.89811	13.3727	0.00384646	0.0399457
Zm00001d049042	0.498725	5.07403	14.9585	0.00267452	0.0325648
Zm00001d039363	0.498677	4.90434	13.217	0.0039917	0.0409298
Zm00001d038685	0.497003	4.60904	15.4258	0.00241399	0.0305696
Zm00001d011130	0.492643	6.33029	13.4938	0.0037378	0.0393187
Zm00001d025581	0.491796	4.27764	16.5492	0.00190164	0.0266435
Zm00001d027826	0.488894	4.66709	15.9653	0.00214979	0.0286735
Zm00001d034805	0.47831	4.51544	15.186	0.00254374	0.0316262
Zm00001d034346	0.477797	4.31904	13.3391	0.00387724	0.0401772
Zm00001d038248	0.477506	4.74574	15.015	0.0026413	0.0323899
Zm00001d000302	0.474328	5.98058	13.4204	0.00380322	0.0396546
Zm00001d003089	0.472056	3.83763	12.8814	0.00432759	0.0430681
Zm00001d049571	0.468489	3.55049	13.8229	0.00346057	0.0377773
Zm00001d049192	0.463825	4.6596	18.3751	0.00131839	0.0213014
Zm00001d034480	0.463733	5.48791	11.9328	0.00547568	0.0499237
Zm00001d011231	0.460922	5.10603	12.5426	0.00470131	0.0454621
Zm00001d036406	0.46049	4.49455	12.672	0.00455428	0.0444985
Zm00001d022159	0.445978	5.11219	15.2179	0.002526	0.031447
Zm00001d029653	0.434952	5.25545	12.3592	0.00491966	0.0468077
Zm00001d035032	0.430664	5.15839	13.5549	0.00368439	0.0390383

## Sheet: Group VI
FileS1.6. Significant differentially downpregulated genes in mop1-1 mutant in response to ABA (1607 DEGs).
Gene_id_v4	log2FC	log2CPM	F	PValue	FDR
Zm00001d047039	-0.451941	4.70992	13.8157	0.00346637	0.0378
Zm00001d026532	-0.456545	5.65964	12.6557	0.00457248	0.0446423
Zm00001d031317	-0.476399	4.489	15.4167	0.0024188	0.0305813
Zm00001d047472	-0.482822	5.41801	13.356	0.00386179	0.0400756
Zm00001d008757	-0.483788	6.53201	12.3995	0.00487071	0.0465136
Zm00001d038092	-0.484321	4.29191	15.6245	0.00231244	0.0299309
Zm00001d013971	-0.484991	4.86472	16.7951	0.00180741	0.0259006
Zm00001d001763	-0.485069	3.91002	11.9371	0.00546982	0.0499237
Zm00001d014946	-0.488206	5.92516	13.4576	0.0037699	0.0394812
Zm00001d031118	-0.488834	4.47956	14.9879	0.00265721	0.0324329
Zm00001d045354	-0.490853	3.86442	12.3852	0.00488801	0.0466474
Zm00001d047965	-0.495152	5.47023	11.9275	0.00548314	0.0499237
Zm00001d021815	-0.496308	6.29123	12.9206	0.00428665	0.0428544
Zm00001d039456	-0.496906	5.72312	14.1048	0.00324233	0.0364058
Zm00001d038158	-0.498124	3.91778	12.7551	0.00446262	0.0440548
ENSRNA049473603	-0.504688	5.35913	15.165	0.00255549	0.0317029
Zm00001d039594	-0.507288	5.57101	17.3408	0.00161738	0.0243347
Zm00001d022499	-0.50962	4.19969	14.6503	0.00286476	0.0340079
Zm00001d018394	-0.513503	4.85907	15.5943	0.00232755	0.0300305
Zm00001d026956	-0.515821	4.6114	17.374	0.00160661	0.0242958
Zm00001d043870	-0.525167	4.3149	15.1528	0.00256234	0.0317124
Zm00001d051759	-0.525405	4.02991	12.8381	0.00437337	0.043385
Zm00001d012031	-0.525688	3.66822	12.3552	0.00492455	0.0468386
Zm00001d025305	-0.526957	6.52721	12.895	0.00431332	0.0429697
Zm00001d016358	-0.527101	5.50481	14.3524	0.00306401	0.035367
Zm00001d047501	-0.527185	5.06831	12.4085	0.00485983	0.0464565
Zm00001d004839	-0.530738	6.57936	12.5449	0.00469873	0.0454621
Zm00001d053232	-0.530786	4.16325	18.5144	0.00128333	0.0208897
Zm00001d011699	-0.531144	3.68344	12.1364	0.00520135	0.0483845
Zm00001d017584	-0.534663	6.18057	13.6758	0.00358138	0.038606
Zm00001d042005	-0.537106	6.56351	12.1429	0.00519284	0.0483529
Zm00001d027544	-0.543937	4.31631	13.7381	0.0035296	0.0382659
Zm00001d050184	-0.545557	3.54715	16.4346	0.00194753	0.0270969
Zm00001d032019	-0.545582	6.29383	14.4706	0.00298302	0.0349121
Zm00001d001877	-0.546371	4.30753	12.3642	0.00491355	0.0467653
Zm00001d033827	-0.546594	4.27228	12.8212	0.00439137	0.0435332
Zm00001d000120	-0.546698	5.46679	12.6179	0.00461508	0.0449037
Zm00001d012601	-0.547395	3.97872	12.0959	0.00525457	0.0487383
Zm00001d046591	-0.54994	6.33079	12.124	0.00521756	0.0485035
Zm00001d006605	-0.550537	3.94267	13.0815	0.00412343	0.0417523
Zm00001d022614	-0.551604	4.58749	15.4948	0.00237815	0.0303476
Zm00001d049351	-0.552438	4.93481	13.6326	0.00361781	0.0387945
Zm00001d012771	-0.553279	4.66109	15.2598	0.00250295	0.031256
Zm00001d016865	-0.553916	4.92356	15.3694	0.00244379	0.0308073
Zm00001d006894	-0.557517	2.65986	12.0622	0.00529948	0.0490081
Zm00001d010406	-0.559438	4.20869	11.9335	0.00547478	0.0499237
Zm00001d003632	-0.559477	7.01469	12.0811	0.00527423	0.0488702
Zm00001d046489	-0.561045	5.07043	11.9705	0.00542372	0.0497194
Zm00001d043778	-0.561224	5.29875	13.667	0.00358877	0.0386563
Zm00001d050216	-0.561776	3.95421	17.7321	0.00149563	0.0232899
Zm00001d021020	-0.563692	4.80523	16.2255	0.00203472	0.0277144
Zm00001d042122	-0.565773	4.146	11.9614	0.00543618	0.0498176
Zm00001d017769	-0.56581	4.49085	16.4097	0.00195768	0.0271329
Zm00001d052698	-0.571787	3.86942	12.9789	0.00422671	0.0424346
Zm00001d046120	-0.572746	4.67419	19.404	0.00108389	0.0190652
Zm00001d052696	-0.573038	3.18615	12.1114	0.0052342	0.0486422
Zm00001d009870	-0.574659	5.75177	12.0957	0.00525484	0.0487383
Zm00001d026051	-0.575351	3.68269	17.8521	0.00146051	0.0229808
Zm00001d002953	-0.575475	4.8506	18.6075	0.00126054	0.0206729
Zm00001d019200	-0.575958	4.51883	14.9094	0.00270379	0.0328206
Zm00001d000443	-0.576154	3.95873	16.6708	0.00185432	0.0261775
Zm00001d009779	-0.576332	4.99913	14.6585	0.00285949	0.0339994
Zm00001d051563	-0.577416	5.16149	17.7389	0.00149362	0.0232713
Zm00001d039020	-0.577492	6.87282	12.0418	0.0053268	0.0491326
Zm00001d052410	-0.578501	4.28582	13.8398	0.00344703	0.037702
Zm00001d037666	-0.57878	4.57157	14.6315	0.00287685	0.0341372
Zm00001d003292	-0.580075	4.34522	14.2794	0.00311537	0.0357273
Zm00001d000301	-0.580468	3.64009	11.9241	0.0054879	0.0499367
Zm00001d022544	-0.583839	4.93952	15.1705	0.0025524	0.0316903
Zm00001d031526	-0.585152	4.82026	13.6279	0.00362176	0.0388054
Zm00001d044548	-0.585533	4.45601	15.7073	0.00227162	0.0296051
Zm00001d015605	-0.585749	4.24079	13.6509	0.00360231	0.0387286
Zm00001d039158	-0.586247	4.37949	12.3409	0.00494209	0.0468954
Zm00001d011263	-0.586859	3.98091	16.3608	0.00197778	0.027229
Zm00001d039146	-0.587498	5.33191	12.6811	0.0045441	0.0444723
Zm00001d045194	-0.589068	5.92577	14.5408	0.00293613	0.0345229
Zm00001d034855	-0.589181	5.69515	19.2141	0.00112319	0.0194914
Zm00001d006555	-0.589329	5.49444	14.4805	0.00297636	0.0348714
Zm00001d046354	-0.589532	6.07129	13.6177	0.00363048	0.0388076
Zm00001d018624	-0.589639	3.76954	13.6523	0.0036011	0.0387286
Zm00001d009723	-0.590874	4.6185	12.9304	0.00427647	0.0427677
Zm00001d045554	-0.590887	4.08147	16.5916	0.00188497	0.0264754
Zm00001d038909	-0.59817	5.1887	19.0353	0.00116173	0.0198558
Zm00001d015210	-0.598184	4.90574	13.0418	0.00416305	0.0419588
Zm00001d002103	-0.599026	3.69027	13.5332	0.00370333	0.0391471
Zm00001d043922	-0.599173	3.96624	21.1295	0.000792465	0.0157339
Zm00001d010009	-0.599255	4.50884	15.8558	0.00220055	0.0290856
Zm00001d013452	-0.602653	3.25593	13.0035	0.00420166	0.0422472
Zm00001d001982	-0.60325	3.09141	12.3647	0.00491296	0.0467653
Zm00001d044412	-0.605334	4.39614	13.2856	0.00392692	0.040485
Zm00001d002156	-0.607003	5.63083	22.6544	0.000609613	0.0134285
Zm00001d033650	-0.607475	3.75868	17.2681	0.00164126	0.0244574
Zm00001d018599	-0.60776	4.10918	20.3607	0.000909063	0.0173105
Zm00001d030614	-0.60787	3.32441	14.6566	0.00286068	0.0339994
ENSRNA049476303	-0.608338	6.40573	14.1717	0.00319294	0.0361888
Zm00001d049666	-0.609064	7.59401	11.9823	0.00540752	0.0496308
Zm00001d018413	-0.609971	6.65261	12.4518	0.00480792	0.0461646
Zm00001d004176	-0.614292	5.70942	14.2124	0.00316338	0.0360593
Zm00001d013430	-0.616795	4.39246	14.1861	0.00318244	0.0361169
Zm00001d032435	-0.617523	4.55857	17.3867	0.00160252	0.0242489
Zm00001d027721	-0.617841	5.21435	17.9912	0.00142099	0.0225232
Zm00001d015037	-0.618309	4.7117	12.5474	0.00469574	0.0454621
Zm00001d041941	-0.618369	3.84787	20.0062	0.000969634	0.0179689
Zm00001d050383	-0.618482	5.97133	15.0121	0.00264301	0.0323899
Zm00001d044250	-0.618544	5.46105	23.1548	0.000560861	0.0127882
Zm00001d026700	-0.618757	5.58277	14.7682	0.00279014	0.0334243
Zm00001d011454	-0.619077	8.32576	12.8557	0.00435464	0.0432749
Zm00001d003931	-0.619585	5.22696	21.9704	0.000684656	0.0144317
Zm00001d038975	-0.620846	4.14752	19.5277	0.00105916	0.0187816
Zm00001d025203	-0.621022	4.50265	13.6764	0.00358087	0.038606
Zm00001d049190	-0.621545	4.65801	12.5745	0.00466461	0.0452439
Zm00001d003376	-0.622054	2.93531	14.3804	0.00304459	0.0352145
Zm00001d040322	-0.623048	5.03428	14.8116	0.00276326	0.0331639
Zm00001d015905	-0.624474	4.30833	16.4868	0.00192648	0.0269119
Zm00001d032131	-0.625718	5.18955	17.6504	0.00152013	0.0235072
Zm00001d032399	-0.627398	5.03955	15.9636	0.00215061	0.0286735
Zm00001d006774	-0.627478	5.14463	19.8743	0.000993386	0.0181904
Zm00001d045836	-0.628783	5.83408	16.1378	0.00207271	0.0280569
Zm00001d010062	-0.628839	4.10498	14.2716	0.00312088	0.0357471
Zm00001d004375	-0.629239	4.31224	18.4321	0.0013039	0.0211638
Zm00001d023698	-0.633204	5.31581	26.6472	0.00032412	0.00945758
Zm00001d022177	-0.63339	3.3605	15.1502	0.00256383	0.0317124
Zm00001d032933	-0.633513	3.9699	15.2432	0.00251206	0.0313284
Zm00001d025541	-0.633879	5.70267	13.4331	0.00379185	0.0396149
Zm00001d012514	-0.635937	4.84845	16.4327	0.00194831	0.0270969
Zm00001d048090	-0.636041	4.55005	13.9813	0.00333585	0.0369418
Zm00001d049886	-0.636793	4.28135	13.7091	0.00355355	0.0384227
Zm00001d029625	-0.637161	5.13865	12.4757	0.00477961	0.0460153
Zm00001d031784	-0.637314	4.15877	14.6714	0.00285118	0.033932
Zm00001d044405	-0.637646	4.64461	14.6189	0.00288499	0.0341909
Zm00001d038467	-0.637913	4.55494	22.8318	0.000591772	0.0132307
Zm00001d030950	-0.638354	5.82187	12.3777	0.0048971	0.0467184
Zm00001d042528	-0.638754	3.01337	12.5954	0.00464061	0.0450748
Zm00001d042861	-0.639218	3.48274	12.3447	0.00493748	0.0468954
Zm00001d052493	-0.639725	5.75921	12.4836	0.00477033	0.0459416
Zm00001d002258	-0.639778	6.78905	13.1297	0.00407605	0.0414787
Zm00001d032695	-0.640207	7.50697	15.25	0.00250835	0.0312959
Zm00001d013027	-0.641475	5.64915	24.303	0.000465425	0.0116139
Zm00001d033079	-0.643831	2.9587	14.0813	0.00325985	0.0364703
Zm00001d012606	-0.644024	3.73486	21.4015	0.000755521	0.0152134
Zm00001d031740	-0.645248	5.18974	20.7245	0.000851515	0.0166271
ENSRNA049467592	-0.64533	4.86544	15.5114	0.00236961	0.0302977
Zm00001d040409	-0.645759	3.97822	13.2139	0.00399469	0.0409308
Zm00001d020182	-0.646277	3.06419	15.4934	0.00237886	0.0303476
Zm00001d001861	-0.646281	4.43165	14.9156	0.00270009	0.0327941
Zm00001d027318	-0.646566	5.19477	14.245	0.00313991	0.0358424
Zm00001d010611	-0.650669	3.32823	21.1369	0.000791431	0.0157244
Zm00001d006002	-0.65089	4.81597	13.4054	0.00381681	0.0397247
Zm00001d007819	-0.650961	8.00755	14.9986	0.00265092	0.0324188
Zm00001d018183	-0.651603	6.17482	13.3604	0.00385769	0.0400477
Zm00001d008327	-0.651751	5.41186	26.8288	0.000315469	0.00930405
Zm00001d004473	-0.652667	6.97498	19.2943	0.00110638	0.0193028
Zm00001d039316	-0.653812	5.77279	14.8617	0.0027326	0.0330052
Zm00001d017707	-0.655856	3.89544	23.0516	0.00057053	0.012929
Zm00001d045655	-0.656164	3.02822	13.8832	0.00341244	0.0374827
Zm00001d038374	-0.65681	7.55264	13.9322	0.00337394	0.0372697
Zm00001d007862	-0.658143	5.48965	13.6167	0.00363127	0.0388076
Zm00001d046742	-0.658253	5.66807	20.1198	0.000949717	0.017748
Zm00001d007186	-0.66088	4.65111	13.2978	0.00391553	0.0404263
Zm00001d051950	-0.661522	2.92537	11.9801	0.00541054	0.0496308
Zm00001d009579	-0.661648	6.89263	18.4082	0.00130995	0.0212323
Zm00001d013271	-0.66272	4.03832	14.5528	0.0029282	0.0344726
Zm00001d054066	-0.663857	7.62009	12.0524	0.0053126	0.0490655
MSTRG.17030	-0.664414	6.40961	14.2735	0.00311953	0.0357461
Zm00001d045128	-0.664628	3.19674	16.5701	0.00189342	0.0265546
Zm00001d018916	-0.665407	3.63639	14.1459	0.00321186	0.0362367
Zm00001d020544	-0.666929	4.96778	18.3596	0.00132235	0.0213532
Zm00001d038698	-0.667049	2.33432	12.1344	0.00520404	0.0483936
Zm00001d003889	-0.667515	3.87237	13.1119	0.00409343	0.0415962
Zm00001d041518	-0.66863	5.55526	13.0433	0.00416148	0.0419579
Zm00001d011445	-0.672938	3.6886	17.6442	0.00152202	0.0235072
Zm00001d026063	-0.673225	3.81262	14.2063	0.00316776	0.0360802
Zm00001d024674	-0.673248	7.85544	13.6863	0.00357257	0.0385403
Zm00001d048775	-0.673475	5.23768	24.3285	0.000463535	0.011585
Zm00001d021968	-0.674927	2.8683	11.9994	0.00538413	0.0495005
Zm00001d004841	-0.67564	7.12978	15.2835	0.00249	0.0311355
Zm00001d025149	-0.675721	3.7431	14.9066	0.0027055	0.0328206
Zm00001d040201	-0.676311	5.60387	14.0849	0.00325718	0.0364574
Zm00001d035604	-0.677311	3.06353	13.607	0.00363954	0.0388492
Zm00001d020219	-0.678175	5.20212	17.467	0.00157686	0.024066
Zm00001d014781	-0.678888	5.88755	12.2226	0.00509014	0.0476679
Zm00001d012178	-0.678933	5.53199	12.9587	0.00424734	0.0425664
Zm00001d039000	-0.679053	4.72223	16.9174	0.0017626	0.0254626
Zm00001d035208	-0.679061	4.64453	13.8642	0.00342749	0.0375646
Zm00001d037359	-0.679095	4.47234	16.3343	0.00198879	0.0273042
Zm00001d022006	-0.679385	5.64998	14.2441	0.00314057	0.0358424
Zm00001d053858	-0.680693	3.10108	12.984	0.00422141	0.0423964
Zm00001d022144	-0.681689	4.3537	12.9069	0.00430096	0.0429068
Zm00001d035072	-0.68238	5.32451	11.9936	0.00539202	0.0495248
Zm00001d015705	-0.685217	5.85286	14.5053	0.00295971	0.0347427
Zm00001d005649	-0.685617	5.92219	20.8105	0.000838554	0.0164306
Zm00001d008387	-0.686109	7.85562	14.1544	0.00320564	0.0362367
Zm00001d013465	-0.686839	7.32535	12.2556	0.00504836	0.0474154
Zm00001d029577	-0.687119	3.2625	15.7969	0.0022284	0.029284
Zm00001d015182	-0.687589	3.49184	13.7232	0.00354191	0.0383407
Zm00001d013181	-0.687591	3.87102	13.6307	0.00361938	0.0387945
Zm00001d035171	-0.690994	3.49618	14.7388	0.00280853	0.0335414
Zm00001d052423	-0.691757	4.0673	19.3418	0.00109658	0.0191695
Zm00001d030083	-0.693943	3.85839	12.5189	0.00472885	0.0456506
Zm00001d013262	-0.694034	3.89403	27.5037	0.00028564	0.00878979
Zm00001d053547	-0.694632	6.28347	13.4372	0.00378818	0.0396015
Zm00001d038224	-0.695427	5.96603	12.2323	0.00507779	0.0475944
Zm00001d011192	-0.695683	6.11889	24.1045	0.000480453	0.0118265
Zm00001d038535	-0.696094	7.18102	12.0125	0.00536632	0.0494168
Zm00001d050666	-0.696194	6.9345	12.7282	0.00449207	0.0442035
Zm00001d035752	-0.696352	5.30558	23.0922	0.0005667	0.0128627
Zm00001d050921	-0.698014	7.51141	20.7003	0.000855212	0.0166649
Zm00001d032760	-0.698433	6.76734	14.1445	0.00321293	0.0362367
Zm00001d028045	-0.700226	4.33132	14.007	0.0033161	0.0368093
Zm00001d032703	-0.701277	4.63144	16.7879	0.0018101	0.0259014
Zm00001d028195	-0.702576	2.84339	12.8034	0.00441036	0.0436757
Zm00001d008376	-0.702893	5.48427	16.0468	0.00211296	0.0284522
Zm00001d021731	-0.703994	5.1122	17.2649	0.00164233	0.0244574
Zm00001d006064	-0.70421	4.85565	17.9605	0.00142962	0.022622
Zm00001d018544	-0.704561	5.93721	12.5967	0.00463922	0.0450748
Zm00001d029505	-0.704654	4.84521	14.6965	0.00283519	0.0337984
Zm00001d039498	-0.706166	3.53449	17.0745	0.001707	0.0249773
Zm00001d033830	-0.706644	3.99987	19.7206	0.00102195	0.0184562
Zm00001d004523	-0.70778	4.05874	13.7498	0.00351995	0.0381904
Zm00001d016528	-0.708014	4.92135	26.2224	0.000345468	0.00979497
Zm00001d053743	-0.709065	5.43671	15.6627	0.0022935	0.0297401
Zm00001d036801	-0.709993	5.49904	15.788	0.00223267	0.0292995
Zm00001d012598	-0.710033	6.30521	13.7924	0.00348524	0.0379444
Zm00001d015378	-0.710146	3.94554	12.4875	0.00476568	0.0459124
MSTRG.2385	-0.710855	6.03076	12.5454	0.00469816	0.0454621
Zm00001d006630	-0.711163	3.52472	17.3593	0.00161138	0.0243052
Zm00001d007164	-0.711587	2.21321	12.4361	0.00482672	0.0462804
Zm00001d009967	-0.712055	6.61181	12.4166	0.00485004	0.0464256
Zm00001d038085	-0.712675	5.54651	15.9695	0.00214789	0.0286735
ENSRNA049475761	-0.713123	7.84497	14.2629	0.00312708	0.0357892
Zm00001d027714	-0.713297	5.15581	14.7428	0.002806	0.0335349
Zm00001d023301	-0.714542	4.12942	21.9633	0.000685483	0.0144384
Zm00001d044821	-0.716147	4.24346	19.5947	0.00104607	0.0186543
Zm00001d027451	-0.716762	4.21079	13.2646	0.0039466	0.0405994
Zm00001d043058	-0.717361	5.05226	28.0589	0.000263585	0.00845977
Zm00001d021280	-0.717865	3.38975	15.8193	0.00221776	0.0292094
Zm00001d009872	-0.718344	2.74473	14.1513	0.00320792	0.0362367
Zm00001d020775	-0.718495	5.5467	16.3643	0.00197635	0.027229
Zm00001d018957	-0.718728	7.95933	18.8129	0.00121192	0.0202262
Zm00001d034345	-0.722255	5.55628	22.408	0.00063546	0.0137523
Zm00001d028745	-0.723002	6.23966	16.1268	0.00207751	0.0280949
Zm00001d052103	-0.723564	4.11227	23.8999	0.00049656	0.0120003
Zm00001d033421	-0.723988	4.06724	15.4389	0.00240714	0.03053
Zm00001d054043	-0.724245	6.73182	18.1495	0.00137758	0.022032
Zm00001d051416	-0.724806	4.42302	16.2442	0.00202677	0.0276725
Zm00001d018652	-0.724965	5.4406	19.6115	0.0010428	0.0186185
Zm00001d045926	-0.725432	4.25309	20.6655	0.000860543	0.0167281
Zm00001d039299	-0.725909	5.61117	16.0241	0.00212314	0.0284606
Zm00001d036297	-0.725974	4.56209	12.197	0.00512288	0.0479058
Zm00001d046485	-0.727981	3.35552	12.1396	0.00519721	0.0483619
Zm00001d043786	-0.728097	5.53512	30.229	0.000194665	0.0071265
Zm00001d012212	-0.728286	2.47434	13.8162	0.00346597	0.0378
Zm00001d052615	-0.728362	2.98021	13.559	0.00368085	0.0390383
Zm00001d023592	-0.728746	4.35371	19.7605	0.00101444	0.0184027
Zm00001d046317	-0.729757	5.58141	15.1262	0.00257736	0.031835
Zm00001d013185	-0.729976	5.82358	15.0124	0.00264285	0.0323899
Zm00001d035038	-0.730532	9.17835	12.4517	0.00480813	0.0461646
Zm00001d045451	-0.731878	9.18853	17.1313	0.00168739	0.024857
Zm00001d022057	-0.732027	3.70666	12.836	0.0043756	0.043392
Zm00001d040588	-0.73321	5.27193	23.4057	0.000538157	0.0126356
Zm00001d041707	-0.734453	3.83039	16.3871	0.00196695	0.0271696
Zm00001d011349	-0.735373	5.36773	19.6582	0.00103381	0.0185523
Zm00001d039966	-0.735611	5.04026	26.1399	0.000349806	0.00984592
Zm00001d037111	-0.73583	7.36322	17.2833	0.00163624	0.0244574
Zm00001d003913	-0.736549	4.94788	15.889	0.00218501	0.0289795
Zm00001d043240	-0.738475	4.40355	14.5716	0.00291586	0.0344323
Zm00001d047727	-0.738604	4.49101	25.7746	0.000369807	0.0101767
Zm00001d044475	-0.738961	6.00281	18.1821	0.00136883	0.0219539
Zm00001d018531	-0.738972	2.86377	14.0846	0.00325742	0.0364574
Zm00001d033469	-0.739305	5.69244	14.4692	0.00298399	0.0349121
Zm00001d021242	-0.74042	4.86704	12.5145	0.00473404	0.045654
Zm00001d003613	-0.740666	6.05473	22.7768	0.000597238	0.013311
Zm00001d039908	-0.740949	7.42739	15.4428	0.00240511	0.0305178
Zm00001d039598	-0.742271	5.48995	15.2571	0.00250442	0.0312607
Zm00001d017482	-0.742355	3.54297	13.068	0.00413686	0.0418238
Zm00001d008700	-0.743476	5.11509	18.2541	0.00134974	0.0217461
Zm00001d030584	-0.743581	3.11126	25.1227	0.000408966	0.0107641
Zm00001d020437	-0.744763	4.82827	20.2944	0.000920037	0.0174138
Zm00001d042954	-0.745173	5.68167	15.5452	0.00235234	0.030172
Zm00001d050969	-0.746135	8.18475	13.8588	0.00343181	0.0375646
Zm00001d011357	-0.746949	4.31449	22.8204	0.000592907	0.0132456
Zm00001d028338	-0.747082	5.60614	12.0057	0.00537557	0.0494378
Zm00001d011386	-0.747847	5.83164	16.1843	0.00205246	0.027889
MSTRG.13493	-0.749354	6.64906	13.0008	0.00420438	0.0422472
Zm00001d039634	-0.750345	3.25966	18.0556	0.00140315	0.0223353
Zm00001d042325	-0.750717	5.59378	17.8045	0.00147434	0.0230722
Zm00001d042847	-0.751321	5.99636	27.6712	0.000278764	0.00868511
Zm00001d011178	-0.751703	4.1401	18.9617	0.00117807	0.019931
Zm00001d032707	-0.752279	2.55394	14.4487	0.00299787	0.0349447
Zm00001d028826	-0.75234	4.23552	18.1683	0.00137253	0.0220008
Zm00001d019473	-0.75246	5.65952	14.3226	0.00308487	0.0355122
Zm00001d033898	-0.75333	7.43656	14.4824	0.00297511	0.0348714
Zm00001d014583	-0.753423	4.01865	13.0459	0.00415896	0.0419579
Zm00001d006100	-0.753969	7.3141	13.257	0.00395378	0.0406143
Zm00001d041773	-0.754199	4.35107	22.9949	0.000575923	0.01302
Zm00001d054065	-0.75669	5.95948	17.6663	0.00151532	0.0234661
Zm00001d038004	-0.756787	3.59898	14.7633	0.00279321	0.0334243
Zm00001d017659	-0.756852	4.08486	12.7443	0.00447439	0.0441001
Zm00001d019956	-0.756879	5.02897	12.1519	0.00518123	0.0483255
Zm00001d009286	-0.757	1.69774	12.7649	0.00445202	0.0439655
Zm00001d020272	-0.75859	4.10281	19.6462	0.00103612	0.018582
Zm00001d048569	-0.760072	5.59803	22.7554	0.000599383	0.0133171
Zm00001d023630	-0.760613	3.123	13.1339	0.00407187	0.041467
Zm00001d009480	-0.760616	8.33502	15.7468	0.00225245	0.02945
Zm00001d034874	-0.761712	4.38874	18.7078	0.00123651	0.02048
Zm00001d039038	-0.762608	5.59484	31.6985	0.000160019	0.00643286
Zm00001d034486	-0.763135	5.91694	13.3791	0.00384063	0.0398998
Zm00001d045000	-0.763806	7.26467	17.0322	0.00172177	0.0250927
Zm00001d011551	-0.764767	2.86322	14.0172	0.00330834	0.0367618
Zm00001d017778	-0.765053	4.3213	16.4124	0.00195657	0.0271329
Zm00001d034550	-0.765258	6.82053	15.8795	0.00218945	0.0290005
Zm00001d005812	-0.76539	6.2315	19.0743	0.0011532	0.0197815
Zm00001d013245	-0.765628	7.55909	12.1407	0.00519572	0.0483619
Zm00001d021883	-0.765653	3.93957	12.3178	0.00497058	0.0470587
Zm00001d020280	-0.766235	1.81124	12.0985	0.00525125	0.0487368
Zm00001d006547	-0.766686	6.831	19.301	0.00110499	0.0192927
Zm00001d004340	-0.767038	4.26042	12.0093	0.00537067	0.0494253
Zm00001d049503	-0.768225	4.11083	14.365	0.00305529	0.0353094
Zm00001d033591	-0.768835	7.54491	17.1076	0.00169552	0.0248992
Zm00001d017111	-0.769	5.84226	17.7456	0.00149162	0.0232657
Zm00001d009127	-0.769152	6.00535	19.2034	0.00112544	0.0195058
Zm00001d034851	-0.769538	4.30898	23.6084	0.000520611	0.0124333
Zm00001d031653	-0.770472	4.0291	12.741	0.00447803	0.0441044
Zm00001d021400	-0.770517	4.91879	28.8965	0.00023401	0.00795129
Zm00001d044828	-0.772199	4.03324	12.9142	0.00429327	0.0428706
Zm00001d048794	-0.774317	4.99858	17.1569	0.00167865	0.0247926
Zm00001d027999	-0.774704	5.20298	14.8136	0.002762	0.0331627
Zm00001d041709	-0.77633	2.92103	18.9841	0.00117307	0.0199301
Zm00001d018984	-0.777758	5.64015	14.0369	0.00329338	0.0366917
Zm00001d008216	-0.778272	5.81685	13.986	0.00333224	0.0369162
Zm00001d002822	-0.778743	7.10427	14.5658	0.00291967	0.0344323
MSTRG.4245	-0.779116	6.17899	12.9622	0.00424377	0.0425607
Zm00001d021817	-0.780172	5.15238	16.6971	0.00184427	0.0260715
Zm00001d028373	-0.782936	4.89038	19.6152	0.00104209	0.0186185
Zm00001d014313	-0.784175	5.96386	15.8469	0.00220472	0.0290941
Zm00001d019852	-0.784761	3.04739	19.8139	0.0010045	0.0183216
Zm00001d048138	-0.785164	2.73121	13.9468	0.00336256	0.037165
Zm00001d018555	-0.786838	5.32557	13.1734	0.00403359	0.0412251
Zm00001d034514	-0.786851	3.32322	14.3224	0.00308502	0.0355122
Zm00001d026652	-0.787354	7.15116	24.7392	0.000434306	0.0111512
Zm00001d045889	-0.787483	6.24078	16.9463	0.00175223	0.0254011
Zm00001d017698	-0.787638	2.48874	13.2899	0.00392289	0.040485
Zm00001d033112	-0.787857	4.12178	23.2237	0.000554515	0.0127175
Zm00001d047307	-0.788416	4.14595	12.5148	0.00473368	0.045654
Zm00001d043921	-0.788434	3.87687	22.2145	0.000656682	0.0140618
Zm00001d050119	-0.788831	2.69327	14.6666	0.0028543	0.0339548
Zm00001d032776	-0.788959	7.46783	11.9502	0.00545162	0.0498946
Zm00001d009211	-0.789253	5.8547	13.888	0.00340865	0.0374584
Zm00001d032181	-0.78948	5.20597	16.7023	0.00184231	0.0260568
Zm00001d052039	-0.791264	3.79843	27.5183	0.000285035	0.00878979
Zm00001d011797	-0.791762	6.48793	12.8984	0.00430977	0.0429494
Zm00001d022275	-0.791808	4.96159	28.1121	0.00026158	0.00842305
Zm00001d011562	-0.79339	2.78001	16.4054	0.00195943	0.0271329
Zm00001d003368	-0.793843	3.41029	18.848	0.00120382	0.0201503
Zm00001d005846	-0.795337	2.80819	12.7948	0.00441962	0.0437368
Zm00001d052075	-0.795802	7.20727	14.9821	0.00266058	0.0324471
Zm00001d015025	-0.796662	5.91565	12.5229	0.00472424	0.0456215
Zm00001d032805	-0.798708	3.26968	22.8321	0.00059175	0.0132307
Zm00001d006287	-0.799905	6.80842	13.4749	0.00375457	0.0394119
Zm00001d028221	-0.801896	5.32283	16.946	0.00175231	0.0254011
Zm00001d018214	-0.80439	8.41526	12.724	0.00449664	0.0442035
Zm00001d013034	-0.805104	8.38733	14.8013	0.00276963	0.0332121
Zm00001d052256	-0.806154	5.01613	12.6977	0.0045257	0.0443534
Zm00001d024723	-0.806401	7.27199	13.0112	0.00419385	0.0421943
MSTRG.8261	-0.806645	1.06866	12.7264	0.00449398	0.0442035
Zm00001d016665	-0.806709	5.5615	18.7275	0.00123184	0.0204385
Zm00001d017435	-0.807485	5.69274	21.8019	0.000704786	0.0146815
Zm00001d048060	-0.809308	5.71349	22.453	0.000630644	0.0136689
Zm00001d035201	-0.809464	8.72168	13.8975	0.00340116	0.0374168
Zm00001d039188	-0.810062	5.90376	13.7811	0.00349436	0.0379709
Zm00001d031311	-0.811549	3.89996	20.2623	0.000925423	0.0174924
Zm00001d053732	-0.812724	4.5385	21.4867	0.000744366	0.0150207
Zm00001d043201	-0.813058	5.7952	14.5581	0.00292471	0.0344575
Zm00001d006250	-0.813786	5.02764	28.2761	0.00025551	0.00836129
Zm00001d017047	-0.814197	7.163	25.435	0.000389624	0.0104682
Zm00001d028484	-0.814366	5.09813	13.7286	0.00353747	0.0383219
Zm00001d047081	-0.81467	5.65221	15.4265	0.00241364	0.0305696
Zm00001d007076	-0.815061	5.97305	16.5385	0.00190589	0.02669
Zm00001d024241	-0.815209	5.68262	12.3246	0.00496224	0.0470394
Zm00001d002599	-0.816522	5.08422	19.4579	0.00107304	0.0189329
Zm00001d033018	-0.816852	4.16588	18.0929	0.00139293	0.0222109
Zm00001d033241	-0.817212	3.89021	22.4912	0.000626594	0.0136123
Zm00001d014984	-0.817236	4.88555	31.6142	0.000161799	0.00643286
Zm00001d045496	-0.819246	3.2371	21.8477	0.000699243	0.0146254
Zm00001d012693	-0.819801	5.6094	18.5544	0.00127349	0.0207991
Zm00001d030691	-0.820639	8.47057	15.0103	0.00264409	0.0323899
Zm00001d053377	-0.820797	5.25736	17.1149	0.00169301	0.0248992
Zm00001d011387	-0.821072	4.89135	14.4209	0.00301681	0.0350614
MSTRG.25998	-0.821327	3.07345	12.9118	0.00429582	0.0428706
Zm00001d027540	-0.82139	6.42004	13.4191	0.00380445	0.0396546
MSTRG.17075	-0.821655	2.19372	14.0345	0.00329517	0.0366917
Zm00001d010016	-0.822967	5.95863	19.5306	0.00105859	0.0187816
Zm00001d030235	-0.823013	5.15258	19.9983	0.000971045	0.0179689
Zm00001d049588	-0.823358	4.05769	16.1037	0.00208769	0.0282176
Zm00001d023606	-0.82448	5.50766	17.3867	0.0016025	0.0242489
Zm00001d027539	-0.824647	6.84441	12.019	0.00535747	0.0493513
Zm00001d017350	-0.825185	5.45341	12.862	0.00434805	0.0432397
Zm00001d037108	-0.825933	5.45583	17.3378	0.00161835	0.0243347
Zm00001d039840	-0.826204	3.54138	13.4698	0.00375906	0.0394269
Zm00001d015798	-0.826961	5.42572	23.4966	0.000530211	0.0125663
Zm00001d007194	-0.828842	4.69742	14.4551	0.00299351	0.0349447
ENSRNA049459593	-0.829083	5.96977	24.2761	0.000467426	0.0116289
Zm00001d016276	-0.82914	6.05206	13.4683	0.00376037	0.0394269
Zm00001d007184	-0.829867	3.63907	32.8679	0.000137589	0.00591464
Zm00001d009572	-0.829948	4.21405	13.7294	0.00353676	0.0383219
Zm00001d028957	-0.830444	6.0184	13.4995	0.00373286	0.0393046
Zm00001d002825	-0.831503	2.58178	16.2276	0.00203383	0.0277144
ENSRNA049475693	-0.833123	6.8169	13.2997	0.0039138	0.0404231
Zm00001d023802	-0.833703	6.92856	26.4162	0.000335525	0.0096254
Zm00001d051062	-0.833839	5.80342	15.5745	0.00233751	0.0300907
Zm00001d044836	-0.835277	3.87082	13.6099	0.00363711	0.0388378
Zm00001d006866	-0.835282	5.99521	26.8359	0.000315138	0.00930405
Zm00001d029258	-0.835751	3.58663	22.8801	0.000587024	0.0131557
Zm00001d037221	-0.835848	3.4136	16.0261	0.00212225	0.0284606
Zm00001d040107	-0.836269	3.62987	19.853	0.000997284	0.0182313
Zm00001d039253	-0.836571	4.22489	16.4697	0.00193333	0.0269943
Zm00001d015783	-0.836593	3.35521	14.8986	0.00271033	0.0328234
Zm00001d027471	-0.837919	6.48164	17.0452	0.0017172	0.0250491
Zm00001d033634	-0.838021	4.84437	13.9946	0.00332565	0.0368609
Zm00001d011301	-0.840458	2.40278	12.8092	0.00440424	0.0436455
Zm00001d028003	-0.840623	4.91395	17.2308	0.00165368	0.0245449
Zm00001d049610	-0.841148	5.38023	24.4827	0.000452292	0.0114066
Zm00001d052595	-0.841994	10.6702	12.3479	0.0049335	0.0468922
Zm00001d028770	-0.842158	3.83181	19.7393	0.00101843	0.018432
Zm00001d027421	-0.842203	6.53464	12.7072	0.00451519	0.0442981
Zm00001d014016	-0.843188	1.90326	14.4012	0.00303027	0.0351345
Zm00001d002426	-0.84365	7.42669	12.471	0.00478517	0.0460256
Zm00001d008610	-0.844989	7.47868	14.1071	0.00324062	0.0364058
Zm00001d013529	-0.845302	6.852	19.5048	0.00106369	0.0188383
Zm00001d037860	-0.846006	3.7949	17.8269	0.0014678	0.0230335
Zm00001d035592	-0.84607	2.89677	12.2323	0.00507783	0.0475944
Zm00001d022575	-0.84653	4.64911	19.7091	0.00102413	0.0184733
Zm00001d049239	-0.846986	9.76147	12.9119	0.00429566	0.0428706
Zm00001d020238	-0.847674	4.7533	19.362	0.00109244	0.0191207
Zm00001d013662	-0.848222	2.49209	14.1119	0.00323702	0.0364058
Zm00001d013223	-0.849423	5.50661	23.377	0.000540703	0.0126356
Zm00001d028210	-0.850163	3.37214	31.7057	0.000159868	0.00643286
Zm00001d017090	-0.850257	4.04605	12.6464	0.0045829	0.0446672
Zm00001d007824	-0.850584	8.84324	21.6858	0.000719065	0.0148158
Zm00001d023813	-0.851151	4.56698	29.5387	0.000213976	0.00754152
Zm00001d041672	-0.852351	6.71913	14.258	0.00313061	0.0357929
Zm00001d009506	-0.852737	6.52655	12.2202	0.00509329	0.0476762
Zm00001d048313	-0.852907	4.61839	12.5749	0.00466413	0.0452439
Zm00001d021511	-0.853356	7.49518	26.83	0.000315417	0.00930405
Zm00001d023950	-0.853584	5.35574	26.885	0.000312851	0.0092988
Zm00001d047915	-0.853971	4.37915	18.9468	0.0011814	0.0199635
Zm00001d052323	-0.855422	4.86605	32.7033	0.000140509	0.00596513
Zm00001d027852	-0.855828	4.59052	18.9833	0.00117323	0.0199301
Zm00001d053625	-0.856472	5.39016	15.5415	0.00235422	0.0301806
Zm00001d053348	-0.857411	2.67079	16.9014	0.0017684	0.0255276
Zm00001d002358	-0.8579	8.105	17.475	0.00157434	0.0240405
Zm00001d009123	-0.858178	2.69505	11.9973	0.00538704	0.0495088
Zm00001d006704	-0.858248	4.54413	14.9722	0.00266646	0.032483
Zm00001d045599	-0.859048	4.54182	35.2066	0.000102957	0.00500187
Zm00001d013252	-0.859474	6.47856	24.9879	0.00041767	0.0108717
Zm00001d004052	-0.859626	7.55597	20.7914	0.000841415	0.0164752
Zm00001d013507	-0.859783	4.67426	33.1429	0.000132867	0.00580847
Zm00001d021063	-0.860036	3.98662	17.6373	0.00152412	0.0235268
Zm00001d042766	-0.860076	4.26445	13.7822	0.00349346	0.0379709
Zm00001d029150	-0.860432	4.57941	15.4603	0.00239598	0.0304789
Zm00001d015268	-0.860803	6.37762	21.572	0.000733405	0.0149346
Zm00001d004009	-0.860999	5.62828	22.6932	0.00060566	0.0133925
Zm00001d026016	-0.861287	3.13569	14.2802	0.00311477	0.0357273
Zm00001d000107	-0.861492	3.80749	21.7419	0.000712128	0.0147586
Zm00001d005029	-0.861535	6.61479	15.8247	0.00221521	0.0292053
Zm00001d045568	-0.8618	3.70942	27.8668	0.000270982	0.00857113
Zm00001d010625	-0.862227	3.91621	25.1381	0.000407987	0.0107578
Zm00001d043019	-0.862865	6.38433	12.7391	0.00448008	0.0441044
Zm00001d023225	-0.862884	3.41989	13.4274	0.00379698	0.0396268
Zm00001d042527	-0.863577	4.04792	28.0425	0.000264207	0.00846059
Zm00001d034892	-0.864225	5.95177	19.9226	0.000984608	0.0180974
Zm00001d044540	-0.864264	4.98105	24.0571	0.00048413	0.0118682
Zm00001d010535	-0.864314	7.28445	22.3624	0.000640395	0.0138058
Zm00001d000310	-0.86436	4.89582	12.3411	0.00494182	0.0468954
Zm00001d035597	-0.865568	5.53825	15.7928	0.00223039	0.0292849
Zm00001d048117	-0.866106	3.45082	20.2423	0.000928776	0.0175248
Zm00001d029948	-0.866178	4.41911	17.1439	0.00168306	0.0248319
Zm00001d020353	-0.866952	4.03606	26.8683	0.000313625	0.00930405
Zm00001d031303	-0.866958	6.06364	17.6838	0.00151008	0.0234376
Zm00001d041568	-0.866973	8.12057	17.2698	0.0016407	0.0244574
Zm00001d030316	-0.867298	8.56323	17.8117	0.00147223	0.0230571
Zm00001d010174	-0.867768	2.51106	13.3056	0.00390824	0.0403951
Zm00001d005694	-0.868411	6.82148	15.0923	0.00259668	0.0320179
Zm00001d043587	-0.869269	4.47693	30.0051	0.000200693	0.00725804
Zm00001d052749	-0.870964	5.31887	17.4988	0.00156685	0.0239895
Zm00001d052227	-0.870975	2.79507	18.9709	0.00117602	0.0199301
Zm00001d027348	-0.871128	6.1248	15.0882	0.002599	0.0320186
Zm00001d029193	-0.871358	2.12676	16.3794	0.00197013	0.0272001
Zm00001d042850	-0.872505	3.61869	16.4006	0.00196142	0.0271329
Zm00001d020653	-0.873399	1.8933	16.2416	0.00202785	0.027674
Zm00001d037479	-0.873681	7.01932	26.8818	0.000312997	0.0092988
Zm00001d038547	-0.875245	8.67089	16.2303	0.0020327	0.0277135
Zm00001d014965	-0.876753	6.32591	15.4745	0.00238864	0.0304478
Zm00001d031691	-0.876989	4.71749	38.7894	6.79e-05	0.00404877
Zm00001d027291	-0.877163	8.58018	14.5635	0.00292114	0.0344323
Zm00001d021368	-0.877829	5.34356	17.8677	0.00145602	0.0229246
Zm00001d035859	-0.877869	10.0527	14.1879	0.00318118	0.0361169
MSTRG.20591	-0.878479	1.79294	12.7199	0.00450112	0.0442091
Zm00001d042772	-0.879421	6.26834	32.608	0.000142234	0.00596513
Zm00001d034068	-0.880101	3.61197	12.2748	0.00502416	0.0472945
Zm00001d034808	-0.880891	7.12661	15.3607	0.00244843	0.0308379
Zm00001d011964	-0.882774	6.25397	15.4148	0.00241982	0.0305813
Zm00001d006871	-0.883512	7.327	20.2267	0.000931417	0.0175473
Zm00001d027595	-0.883791	8.10975	14.2071	0.00316722	0.0360802
Zm00001d043864	-0.884503	5.42016	13.14	0.00406597	0.0414218
Zm00001d030775	-0.884656	6.02596	16.5808	0.00188921	0.0265146
Zm00001d039977	-0.884786	2.46346	14.1671	0.00319635	0.0361888
Zm00001d043780	-0.886011	5.93112	31.6157	0.000161766	0.00643286
Zm00001d021938	-0.886369	6.46885	20.4407	0.000896019	0.0171537
Zm00001d003172	-0.887319	4.32999	14.4496	0.00299722	0.0349447
Zm00001d030656	-0.887741	2.39994	13.3975	0.00382395	0.0397556
Zm00001d009374	-0.887919	2.16485	13.9064	0.00339417	0.0373776
Zm00001d002253	-0.888038	5.96625	19.4331	0.00107802	0.0189943
Zm00001d033572	-0.888539	2.69391	22.1967	0.000658677	0.0140723
Zm00001d014204	-0.889588	4.38472	20.221	0.000932376	0.0175537
Zm00001d004804	-0.891358	2.76547	12.6716	0.00455462	0.0444985
Zm00001d043018	-0.89193	3.61848	26.6803	0.000322521	0.00944122
Zm00001d026554	-0.892525	4.03205	32.0032	0.000153782	0.0062603
Zm00001d032722	-0.892723	3.67956	16.7206	0.00183537	0.0260041
Zm00001d045987	-0.892865	5.05731	17.1317	0.00168724	0.024857
Zm00001d050100	-0.893282	8.3677	15.8213	0.00221679	0.0292094
Zm00001d013566	-0.893917	5.26091	21.7265	0.000714017	0.0147763
Zm00001d039089	-0.894056	7.73841	22.3371	0.000643144	0.0138246
Zm00001d040204	-0.894651	4.69433	38.3098	7.17e-05	0.00413706
Zm00001d034020	-0.895289	4.17884	16.4261	0.00195101	0.0271211
Zm00001d053807	-0.895676	5.85418	17.4216	0.00159131	0.0241608
Zm00001d017823	-0.895908	5.81312	17.9635	0.00142876	0.022622
Zm00001d015366	-0.896597	7.37061	20.1402	0.000946191	0.0177197
Zm00001d008496	-0.898169	3.04421	12.6261	0.00460581	0.0448289
Zm00001d010520	-0.898286	4.68352	20.3693	0.000907649	0.0173063
Zm00001d013076	-0.898559	5.51724	36.3111	9.03e-05	0.0045971
Zm00001d005460	-0.898969	5.22329	23.9623	0.000491576	0.011945
Zm00001d036250	-0.898981	4.91382	30.0267	0.000200104	0.00725804
Zm00001d026377	-0.899974	4.18651	14.338	0.00307406	0.0354398
Zm00001d052260	-0.900029	2.89092	19.1311	0.0011409	0.0196179
Zm00001d017092	-0.900856	9.4751	20.5591	0.000877125	0.0169637
Zm00001d039193	-0.901148	2.89557	15.4684	0.00239181	0.0304484
Zm00001d050198	-0.902566	5.74802	13.511	0.00372267	0.0392492
Zm00001d036148	-0.902833	5.39496	38.3059	7.17e-05	0.00413706
Zm00001d052433	-0.903495	4.42032	17.3941	0.00160012	0.0242385
Zm00001d045778	-0.904673	2.36692	25.3559	0.000394419	0.0105691
Zm00001d010816	-0.904853	2.74946	20.7268	0.000851173	0.0166271
Zm00001d026501	-0.905856	9.14142	19.124	0.00114242	0.0196203
Zm00001d038532	-0.906988	5.49304	22.0029	0.00068084	0.0143758
Zm00001d048772	-0.906991	3.02911	16.9208	0.00176138	0.0254579
Zm00001d047894	-0.907582	4.74152	34.7657	0.000108614	0.00511892
Zm00001d002096	-0.90767	3.16482	13.4601	0.00376772	0.0394748
Zm00001d031766	-0.908154	2.12489	15.7076	0.00227149	0.0296051
Zm00001d031019	-0.909145	4.01433	24.2963	0.000465921	0.0116161
Zm00001d025352	-0.909674	4.93826	20.4469	0.000895027	0.0171463
Zm00001d039837	-0.910057	7.0639	26.049	0.00035466	0.0099431
Zm00001d048366	-0.910568	4.79129	21.8867	0.000694563	0.0145648
Zm00001d013263	-0.911028	5.74206	15.6882	0.00228099	0.0296455
Zm00001d053998	-0.911603	3.01624	22.4107	0.000635174	0.0137523
Zm00001d002115	-0.911768	3.02926	19.0403	0.00116064	0.019849
Zm00001d002951	-0.912044	4.22065	12.0488	0.00531733	0.0490931
Zm00001d020932	-0.912061	4.54264	13.306	0.0039079	0.0403951
Zm00001d018096	-0.912392	3.86317	14.4221	0.00301593	0.0350614
Zm00001d029124	-0.912816	5.84257	17.0798	0.00170513	0.0249628
Zm00001d026576	-0.913614	3.8116	15.5716	0.00233898	0.0300959
Zm00001d015651	-0.915221	5.12652	19.0483	0.00115889	0.0198432
Zm00001d032945	-0.915321	4.87675	28.8767	0.000234664	0.00796398
Zm00001d018693	-0.91669	7.98497	18.1931	0.0013659	0.0219317
MSTRG.8229	-0.918218	3.65383	14.4669	0.00298551	0.0349155
Zm00001d028125	-0.918673	2.01756	11.9408	0.00546462	0.0499213
Zm00001d020883	-0.920146	5.02342	21.5264	0.000739236	0.0149705
Zm00001d028426	-0.921303	5.4743	21.2845	0.000771155	0.0154514
Zm00001d030363	-0.921779	4.83375	13.3138	0.00390071	0.0403614
Zm00001d053713	-0.921923	8.10799	15.0884	0.00259893	0.0320186
Zm00001d017187	-0.92211	4.46475	23.9859	0.000489716	0.0119366
Zm00001d037539	-0.923255	1.73153	12.0449	0.00532266	0.0491264
Zm00001d029074	-0.924204	6.49285	16.7661	0.00181824	0.0259014
Zm00001d050048	-0.924347	2.40526	16.6692	0.00185494	0.0261775
Zm00001d039085	-0.92494	1.78321	17.6754	0.0015126	0.0234511
Zm00001d013536	-0.925118	3.99302	13.3434	0.00387334	0.0401515
Zm00001d009932	-0.925869	3.61388	12.3648	0.00491284	0.0467653
Zm00001d047128	-0.927729	5.16685	50.7482	2.06e-05	0.00218503
Zm00001d015231	-0.927868	4.61697	19.3517	0.00109455	0.0191459
Zm00001d032410	-0.927913	2.61538	14.0554	0.00327933	0.0366304
Zm00001d020531	-0.929365	5.99217	17.7519	0.00148977	0.0232623
Zm00001d053824	-0.931239	1.66911	12.6294	0.0046021	0.0448235
Zm00001d022518	-0.932446	6.56674	19.8904	0.000990453	0.0181792
Zm00001d053177	-0.932616	6.74563	24.7756	0.000431822	0.0111379
Zm00001d000196	-0.934152	2.94658	19.5628	0.00105227	0.0187062
Zm00001d013323	-0.934221	4.72517	20.0872	0.000955385	0.0178045
Zm00001d048191	-0.934678	3.39532	16.397	0.0019629	0.0271401
Zm00001d047037	-0.934938	6.32427	12.0244	0.00535017	0.0493001
Zm00001d031601	-0.935549	4.60807	12.3284	0.00495756	0.0470107
Zm00001d048086	-0.937416	4.68778	40.5911	5.57e-05	0.00366655
Zm00001d042023	-0.937648	4.99966	21.6496	0.00072359	0.0148336
Zm00001d003709	-0.938041	4.09971	14.4927	0.00296819	0.0348134
Zm00001d021746	-0.938511	3.53424	14.016	0.00330923	0.0367618
Zm00001d014885	-0.938756	2.98751	16.003	0.00213265	0.0285279
Zm00001d040147	-0.939402	4.1653	16.7702	0.0018167	0.0259014
Zm00001d033985	-0.939745	5.31259	18.9271	0.00118582	0.0200144
MSTRG.3360	-0.941363	3.00209	18.6095	0.00126006	0.0206729
Zm00001d035195	-0.941658	3.01959	17.4348	0.00158708	0.0241546
Zm00001d035875	-0.9417	4.32213	13.6937	0.00356642	0.0385403
Zm00001d041769	-0.94239	6.20414	23.9864	0.000489674	0.0119366
Zm00001d028432	-0.942709	7.18198	12.2703	0.00502983	0.0473321
Zm00001d043529	-0.943258	4.25923	23.2199	0.000554864	0.0127175
Zm00001d016557	-0.945233	5.44534	28.9277	0.000232986	0.00794655
Zm00001d007205	-0.945241	3.44797	12.282	0.00501513	0.0472408
Zm00001d003509	-0.945865	4.79456	13.1046	0.00410068	0.0415962
Zm00001d044785	-0.945935	4.72835	14.0971	0.00324802	0.0364109
Zm00001d036135	-0.946806	4.86299	15.6721	0.00228889	0.0297074
Zm00001d032070	-0.947831	8.69323	20.2799	0.000922462	0.0174481
Zm00001d015277	-0.948183	2.49466	15.7758	0.0022385	0.0293487
Zm00001d009868	-0.948665	5.72284	16.9386	0.00175499	0.0254013
Zm00001d020032	-0.948929	3.3632	17.2628	0.00164302	0.0244574
Zm00001d025948	-0.949176	5.51528	20.51	0.000884903	0.0170329
Zm00001d027518	-0.949335	6.97317	12.6086	0.00462558	0.0449596
Zm00001d007573	-0.949926	5.40806	16.7762	0.00181444	0.0259014
Zm00001d017718	-0.950463	2.31401	13.0598	0.004145	0.0418491
Zm00001d015519	-0.951122	5.27688	24.1025	0.000480613	0.0118265
Zm00001d032224	-0.951199	4.74541	26.7184	0.000320697	0.00940931
Zm00001d022628	-0.951884	4.90732	20.7101	0.000853717	0.0166586
Zm00001d047570	-0.953039	4.35225	17.4105	0.00159486	0.0241975
Zm00001d042498	-0.953042	2.6177	14.3468	0.0030679	0.0353975
Zm00001d045649	-0.953081	6.06099	25.6731	0.0003756	0.0102468
Zm00001d028244	-0.954548	6.13489	21.1697	0.000786866	0.0156776
Zm00001d030530	-0.95534	4.49565	19.7366	0.00101893	0.018432
Zm00001d042730	-0.956791	7.03019	15.1789	0.00254768	0.0316598
Zm00001d011431	-0.957132	3.7685	14.264	0.00312633	0.0357892
Zm00001d011392	-0.957467	5.32071	26.6426	0.000324342	0.00945758
Zm00001d012837	-0.958177	7.89422	15.8043	0.0022249	0.0292651
MSTRG.23098	-0.958255	5.11754	13.3009	0.00391265	0.0404231
Zm00001d007773	-0.958891	4.75877	14.1998	0.00317251	0.0360874
Zm00001d039638	-0.959302	3.56848	25.2908	0.000398418	0.010614
Zm00001d025656	-0.959574	3.76258	35.5163	9.92e-05	0.00489436
Zm00001d021298	-0.959719	3.83095	13.5723	0.00366939	0.0389892
MSTRG.20562	-0.960738	2.08304	17.1801	0.00167077	0.0247535
MSTRG.28026	-0.961671	6.83267	26.1829	0.000347539	0.00981183
Zm00001d013598	-0.96278	4.46772	29.7018	0.000209216	0.00741983
Zm00001d051157	-0.963079	4.58436	16.0277	0.00212153	0.0284606
Zm00001d034898	-0.963424	3.70658	32.4989	0.000144238	0.00600929
Zm00001d037371	-0.96386	4.32652	15.5533	0.00234825	0.0301469
Zm00001d040842	-0.964821	4.16128	18.6541	0.00124932	0.0205721
Zm00001d052241	-0.965999	4.54186	27.5553	0.000283501	0.00877154
Zm00001d021706	-0.966991	6.75778	19.7346	0.00101931	0.018432
MSTRG.20826	-0.968768	6.57021	13.5212	0.00371381	0.039214
Zm00001d029201	-0.970415	5.99452	17.9521	0.00143199	0.0226332
Zm00001d034077	-0.970419	5.76357	14.8796	0.00272176	0.0329023
Zm00001d003848	-0.971105	4.28905	36.8058	8.52e-05	0.00445546
Zm00001d032948	-0.972145	7.21676	13.1957	0.00401213	0.0410798
Zm00001d002789	-0.972177	5.19622	22.8993	0.000585147	0.0131239
ENSRNA049453565	-0.97219	5.50351	40.4577	5.65e-05	0.00368746
Zm00001d031822	-0.972416	4.83683	27.2614	0.000295951	0.00896128
Zm00001d037828	-0.972568	6.40002	22.9789	0.000577457	0.0130289
Zm00001d010078	-0.972944	5.16133	16.9367	0.00175567	0.0254013
Zm00001d053395	-0.973642	4.91517	25.1014	0.000410332	0.0107796
Zm00001d035767	-0.974819	5.83089	14.8403	0.00274564	0.0330502
Zm00001d042107	-0.97487	6.65639	26.1277	0.00035045	0.00985428
Zm00001d021424	-0.975824	2.06177	18.0301	0.00141019	0.0224271
Zm00001d007491	-0.976145	1.66786	14.9497	0.00267975	0.0325888
Zm00001d013468	-0.976317	3.48272	14.6107	0.00289032	0.0342254
Zm00001d012423	-0.976808	7.30409	19.0586	0.00115662	0.0198281
Zm00001d028751	-0.978301	5.58651	15.8547	0.00220107	0.0290856
Zm00001d018157	-0.979219	6.63446	14.1692	0.00319475	0.0361888
Zm00001d054000	-0.979339	3.75913	28.409	0.000250715	0.00833497
MSTRG.14977	-0.979529	1.40229	15.4247	0.00241458	0.0305696
Zm00001d051995	-0.979712	4.74142	15.0125	0.00264279	0.0323899
Zm00001d012917	-0.979812	2.78383	13.4029	0.00381904	0.0397247
Zm00001d016696	-0.979989	3.93205	16.7298	0.00183187	0.0260041
Zm00001d031149	-0.980632	2.90442	22.9689	0.000578414	0.0130289
Zm00001d043325	-0.981225	5.38202	20.6005	0.000870638	0.0168728
Zm00001d016723	-0.981874	6.54381	21.1607	0.000788112	0.0156914
Zm00001d019701	-0.98188	2.96858	16.8321	0.00179371	0.0257416
Zm00001d001899	-0.982251	4.93499	18.4557	0.00129798	0.0210797
Zm00001d024047	-0.983598	6.4274	17.2924	0.00163325	0.0244574
Zm00001d048299	-0.984413	2.54037	13.0162	0.00418878	0.0421583
Zm00001d002773	-0.98442	2.07644	17.9332	0.00143731	0.0226931
Zm00001d038979	-0.98463	4.6435	16.771	0.00181641	0.0259014
Zm00001d016736	-0.985497	7.96123	16.4456	0.00194308	0.0270771
Zm00001d008359	-0.985696	7.37836	17.5802	0.00154157	0.0236803
Zm00001d044664	-0.986439	8.58265	26.2646	0.000343276	0.00975895
Zm00001d047207	-0.986604	5.04389	25.8778	0.000364019	0.0101018
MSTRG.2202	-0.987652	3.1037	14.9762	0.00266407	0.0324678
Zm00001d003663	-0.988679	5.45755	20.8512	0.000832489	0.016347
Zm00001d015743	-0.989504	3.31231	20.8455	0.000833343	0.016347
Zm00001d040364	-0.989747	2.97365	21.8411	0.000700033	0.0146254
Zm00001d006788	-0.990503	3.01791	12.7249	0.00449571	0.0442035
Zm00001d023810	-0.991231	7.0151	21.2216	0.000779714	0.0155789
Zm00001d009759	-0.991825	2.65655	19.7037	0.00102514	0.0184733
Zm00001d047516	-0.992696	4.12513	38.3323	7.15e-05	0.00413706
Zm00001d047911	-0.992993	4.255	27.742	0.000275916	0.00866224
Zm00001d012757	-0.993431	3.34007	13.9205	0.00338311	0.0373195
Zm00001d037327	-0.994204	6.19884	14.0709	0.00326767	0.0365289
Zm00001d028226	-0.99472	4.05995	15.0494	0.00262137	0.0322242
Zm00001d025721	-0.996434	3.69363	20.8785	0.000828462	0.0162891
Zm00001d028980	-0.996661	2.36123	17.4612	0.00157871	0.0240812
Zm00001d043872	-0.998511	1.99187	16.8669	0.00178094	0.0256231
Zm00001d009560	-0.999674	1.43649	12.8406	0.00437071	0.0433738
Zm00001d047446	-1.00088	1.20921	12.1506	0.00518289	0.0483255
Zm00001d007094	-1.00094	8.08053	30.1176	0.000197638	0.0072058
Zm00001d029707	-1.00151	4.48994	13.7125	0.00355077	0.0384073
Zm00001d027527	-1.00316	6.35438	33.0808	0.000133917	0.00582742
Zm00001d005148	-1.00317	2.96422	26.2179	0.000345705	0.00979497
Zm00001d023283	-1.00438	3.13217	19.9987	0.000970969	0.0179689
Zm00001d044246	-1.00462	8.27754	12.4678	0.004789	0.0460432
Zm00001d025762	-1.00699	4.21881	16.3389	0.00198691	0.0272991
Zm00001d047512	-1.00767	2.85651	12.6775	0.00454815	0.0444778
Zm00001d013277	-1.01	4.71866	13.0971	0.004108	0.0416407
Zm00001d010736	-1.01016	2.60665	13.1908	0.00401676	0.0410829
Zm00001d029190	-1.0134	4.48963	13.4844	0.00374614	0.0393505
Zm00001d038366	-1.01367	4.67472	27.8415	0.000271974	0.00859292
Zm00001d048256	-1.0147	7.82917	15.7	0.00227518	0.0296071
Zm00001d013554	-1.01479	2.91448	12.286	0.00501013	0.0472094
Zm00001d035020	-1.01483	1.93794	12.4198	0.00484622	0.0464046
Zm00001d029325	-1.01486	6.68114	24.7134	0.000436078	0.0111765
MSTRG.8136	-1.01582	4.32074	16.8809	0.00177584	0.0255757
Zm00001d017871	-1.01627	2.83332	16.759	0.0018209	0.0259014
Zm00001d016470	-1.01698	4.97504	18.0909	0.00139346	0.0222109
Zm00001d048053	-1.01725	7.13723	24.8079	0.000429634	0.0111117
Zm00001d049071	-1.01784	7.27813	18.3897	0.00131467	0.0212655
MSTRG.23575	-1.01794	2.34627	19.3799	0.00108879	0.0191083
Zm00001d026542	-1.018	5.70864	25.6668	0.000375966	0.0102468
Zm00001d045432	-1.01822	3.56667	20.8486	0.000832885	0.016347
MSTRG.16976	-1.01823	5.86996	13.1554	0.00405098	0.0413433
Zm00001d003016	-1.01859	7.2878	12.7454	0.00447321	0.0441001
Zm00001d034112	-1.0186	7.97623	14.4032	0.0030289	0.0351345
Zm00001d040733	-1.01965	4.93755	14.3994	0.00303149	0.0351345
Zm00001d020578	-1.021	3.30994	19.756	0.00101529	0.0184062
Zm00001d050241	-1.02131	7.08829	15.5848	0.00233234	0.0300787
Zm00001d019045	-1.0222	9.24346	16.6443	0.00186452	0.0262923
Zm00001d039337	-1.02255	2.52639	16.9417	0.00175387	0.0254011
Zm00001d037727	-1.02394	6.37134	17.6463	0.00152139	0.0235072
Zm00001d047878	-1.02399	2.21074	17.1214	0.00169078	0.0248812
Zm00001d021010	-1.02553	2.11286	17.5959	0.00153675	0.0236307
Zm00001d038068	-1.02615	3.19524	14.4512	0.00299615	0.0349447
Zm00001d007035	-1.02629	2.99251	13.076	0.00412896	0.0417785
Zm00001d048368	-1.0271	7.66484	22.1149	0.000667926	0.014185
Zm00001d002054	-1.0279	2.53745	16.3034	0.00200173	0.0274495
Zm00001d052804	-1.028	2.93735	25.712	0.000373366	0.01023
Zm00001d050079	-1.02801	1.29594	16.7609	0.00182018	0.0259014
Zm00001d039967	-1.02809	5.4829	19.4353	0.00107757	0.0189943
Zm00001d018415	-1.02923	4.38061	28.2133	0.000257816	0.0083694
Zm00001d033919	-1.03076	4.70587	17.2883	0.0016346	0.0244574
Zm00001d041119	-1.03155	7.27003	16.331	0.00199017	0.0273042
Zm00001d003104	-1.0325	4.78619	18.581	0.00126699	0.0207546
Zm00001d026352	-1.03286	2.01754	13.1419	0.00406413	0.0414218
MSTRG.14754	-1.03334	2.63931	14.1078	0.00324012	0.0364058
Zm00001d052864	-1.03449	6.24757	19.3638	0.00109208	0.0191207
Zm00001d007154	-1.03471	6.53645	16.7723	0.00181591	0.0259014
Zm00001d006841	-1.03606	5.10157	40.0852	5.89e-05	0.0037532
Zm00001d002514	-1.03609	3.19716	28.5459	0.000245884	0.00825588
Zm00001d004232	-1.03872	3.88214	12.2893	0.0050061	0.047187
Zm00001d040254	-1.03909	3.13658	13.855	0.00343484	0.0375833
Zm00001d035378	-1.03947	1.52608	14.9062	0.00270575	0.0328206
Zm00001d031535	-1.04007	4.42883	58.6413	1.06e-05	0.00148501
Zm00001d051235	-1.04062	5.16758	29.8346	0.000205434	0.0073593
Zm00001d015927	-1.04093	3.30329	21.5177	0.000740364	0.0149826
Zm00001d015375	-1.04098	7.09861	16.6272	0.00187114	0.0263229
Zm00001d019552	-1.04194	3.66193	13.5779	0.00366452	0.0389892
Zm00001d014168	-1.0433	6.29782	18.2359	0.00135454	0.021811
Zm00001d003399	-1.04437	4.73629	16.9433	0.00175329	0.0254011
Zm00001d005939	-1.04461	1.91847	15.1534	0.00256201	0.0317124
Zm00001d012485	-1.04501	7.59209	19.8896	0.000990592	0.0181792
Zm00001d006910	-1.04506	5.43828	36.8509	8.47e-05	0.00445546
Zm00001d011900	-1.04508	4.17849	45.4964	3.37e-05	0.00283315
Zm00001d027601	-1.04791	4.70445	16.4011	0.0019612	0.0271329
Zm00001d044841	-1.04804	2.51346	16.0563	0.0021087	0.0284084
Zm00001d047933	-1.04829	4.03708	13.1009	0.00410431	0.0416181
Zm00001d025652	-1.04893	5.12009	34.6681	0.000109914	0.00516306
MSTRG.24173	-1.04976	6.28556	12.2794	0.00501844	0.0472563
Zm00001d038030	-1.05002	2.56832	19.5563	0.00105356	0.0187173
MSTRG.24174	-1.05034	6.28527	12.306	0.00498524	0.0470843
Zm00001d043742	-1.05061	2.27523	25.9719	0.000358838	0.0100108
Zm00001d039581	-1.05073	2.61548	14.5083	0.00295777	0.0347342
Zm00001d049583	-1.05122	4.99656	42.7606	4.43e-05	0.00327103
Zm00001d021038	-1.05157	2.77139	18.8759	0.00119744	0.0201014
Zm00001d000399	-1.05158	8.2315	29.1036	0.000227315	0.00785547
MSTRG.9307	-1.05184	4.57583	20.4179	0.000899722	0.0171783
Zm00001d045535	-1.05261	4.01604	21.8184	0.000702784	0.0146613
Zm00001d007105	-1.05415	3.79271	15.1518	0.00256292	0.0317124
Zm00001d018451	-1.05425	1.32356	14.1011	0.00324511	0.0364058
Zm00001d048181	-1.05502	4.27052	13.0334	0.00417142	0.0420181
Zm00001d043298	-1.05552	1.43573	12.6859	0.00453879	0.044451
Zm00001d042658	-1.05595	4.71881	62.2447	8e-06	0.00127556
Zm00001d036570	-1.05674	6.85519	22.3707	0.000639489	0.0138058
Zm00001d045738	-1.05682	1.20163	16.0583	0.00210781	0.0284084
Zm00001d041544	-1.05703	1.44457	13.8618	0.00342946	0.0375646
Zm00001d039770	-1.0579	7.15058	13.08	0.00412492	0.0417525
Zm00001d031638	-1.05906	2.67564	23.492	0.000530609	0.0125663
Zm00001d038923	-1.05955	7.67376	38.5818	6.95e-05	0.00408644
Zm00001d038606	-1.06022	6.39455	20.0791	0.000956795	0.0178045
Zm00001d039415	-1.06065	5.76922	14.6002	0.00289714	0.0342881
Zm00001d035561	-1.06145	7.7114	11.9282	0.00548212	0.0499237
Zm00001d049995	-1.06273	8.98842	15.3336	0.00246294	0.0309334
Zm00001d027882	-1.06407	0.81171	15.0519	0.00261992	0.0322203
Zm00001d042125	-1.0642	4.19488	34.0736	0.000118254	0.0053977
Zm00001d049851	-1.06473	4.07734	31.16	0.000171793	0.00661647
Zm00001d007012	-1.0656	8.64694	16.0262	0.00212218	0.0284606
Zm00001d023863	-1.06644	4.78933	15.9886	0.00213918	0.0285882
Zm00001d004048	-1.06655	5.34426	14.097	0.00324813	0.0364109
Zm00001d006213	-1.06673	9.23457	18.9682	0.00117661	0.0199301
Zm00001d049000	-1.06831	4.59994	22.4939	0.000626308	0.0136123
Zm00001d020774	-1.06881	4.17904	14.1014	0.00324482	0.0364058
Zm00001d034415	-1.06895	4.88629	37.5188	7.84e-05	0.00427952
Zm00001d016443	-1.06922	5.1527	14.8516	0.00273874	0.0330232
Zm00001d028953	-1.06924	3.20277	18.0081	0.00141629	0.0224612
Zm00001d044683	-1.07097	5.03111	19.7753	0.00101167	0.0183825
Zm00001d009415	-1.0718	3.57461	19.316	0.0011019	0.0192506
Zm00001d009510	-1.07206	6.24123	15.7494	0.0022512	0.0294472
Zm00001d012935	-1.07415	1.5995	20.3451	0.000911632	0.0173223
Zm00001d016492	-1.07429	1.50053	12.4212	0.00484455	0.0464043
Zm00001d040803	-1.07438	4.49953	23.4996	0.000529949	0.0125663
Zm00001d045567	-1.07449	3.93065	26.7788	0.000317826	0.00934994
Zm00001d018926	-1.07465	5.88587	38.5746	6.96e-05	0.00408644
Zm00001d020392	-1.07474	4.45784	45.6482	3.32e-05	0.00282482
Zm00001d006511	-1.07602	6.23808	12.9451	0.00426137	0.0426769
Zm00001d044111	-1.07733	5.11795	47.1878	2.86e-05	0.00262133
Zm00001d023944	-1.07753	3.29574	23.3936	0.000539229	0.0126356
Zm00001d028950	-1.07776	3.94116	12.9003	0.0043078	0.0429448
Zm00001d038282	-1.07776	3.14359	29.0901	0.000227744	0.00785547
Zm00001d048316	-1.07812	4.01685	25.1807	0.000405291	0.0107166
Zm00001d018322	-1.0782	3.10231	12.747	0.00447149	0.0441001
Zm00001d033347	-1.07843	6.74003	21.6908	0.000718439	0.0148136
Zm00001d050412	-1.07956	0.419754	12.0672	0.00529275	0.0489938
MSTRG.30502	-1.08039	2.50123	17.9495	0.00143273	0.0226332
Zm00001d008279	-1.08126	1.07847	15.0046	0.0026474	0.0323899
Zm00001d049011	-1.08205	3.45771	28.3967	0.000251155	0.00833497
Zm00001d031665	-1.08206	2.21429	29.7228	0.000208612	0.00741323
Zm00001d021544	-1.08242	2.97688	12.2674	0.00503354	0.0473357
MSTRG.13325	-1.08257	5.2484	21.5291	0.000738893	0.0149705
Zm00001d031161	-1.08309	5.79634	23.9928	0.000489166	0.0119366
Zm00001d054010	-1.08389	2.85356	43.6047	4.07e-05	0.00318421
Zm00001d003164	-1.08399	4.92114	50.1023	2.18e-05	0.00227278
Zm00001d017454	-1.08486	6.33549	15.6194	0.002315	0.0299367
Zm00001d051532	-1.08528	2.97638	18.9649	0.00117736	0.0199308
Zm00001d014495	-1.08545	4.21928	21.6102	0.000728552	0.014903
Zm00001d012883	-1.08621	3.13974	14.1233	0.00322857	0.0363496
Zm00001d008370	-1.08697	2.08288	12.344	0.00493834	0.0468954
Zm00001d049789	-1.08736	4.59904	13.1264	0.00407926	0.0414827
Zm00001d045544	-1.08887	8.14477	30.6937	0.000182825	0.00688017
Zm00001d027363	-1.09271	5.8256	23.8134	0.000503553	0.012147
Zm00001d008669	-1.09272	7.65009	14.3219	0.00308535	0.0355122
Zm00001d040741	-1.09282	3.56935	33.1709	0.000132398	0.00579689
Zm00001d047787	-1.0929	9.15238	15.7818	0.00223564	0.0293248
Zm00001d041962	-1.09398	2.55198	22.6738	0.000607632	0.01341
Zm00001d048593	-1.09611	8.94949	20.117	0.000950203	0.017748
Zm00001d044420	-1.09661	4.4733	39.633	6.19e-05	0.00386531
Zm00001d027295	-1.09923	6.63888	13.4023	0.00381958	0.0397247
Zm00001d015198	-1.09936	4.79194	13.6351	0.00361568	0.0387945
Zm00001d013295	-1.09982	6.77635	21.7915	0.00070605	0.0146885
Zm00001d005814	-1.09986	8.7329	12.6478	0.00458134	0.0446672
Zm00001d023692	-1.09988	3.79046	24.1048	0.00048043	0.0118265
Zm00001d003469	-1.1003	2.69487	13.755	0.00351574	0.0381739
Zm00001d033039	-1.101	7.49786	12.2441	0.00506285	0.0475167
Zm00001d031449	-1.10286	4.10301	31.3248	0.000168083	0.00653598
Zm00001d013268	-1.10391	6.73457	22.3582	0.00064085	0.0138058
Zm00001d043271	-1.10423	4.2092	18.8807	0.00119633	0.0200961
Zm00001d049166	-1.10479	4.47945	28.252	0.000256391	0.00836129
Zm00001d007992	-1.10557	0.444133	12.5162	0.00473203	0.045654
Zm00001d043737	-1.10599	2.80387	14.8902	0.00271538	0.0328391
Zm00001d053103	-1.10626	7.40491	17.2296	0.00165409	0.0245449
Zm00001d031701	-1.10634	5.94248	17.9539	0.00143149	0.0226332
Zm00001d044434	-1.10734	7.80678	18.6319	0.00125464	0.0206129
Zm00001d033181	-1.10817	4.70274	40.9131	5.38e-05	0.00361514
Zm00001d008312	-1.10847	1.647	18.3837	0.0013162	0.0212783
MSTRG.8269	-1.10855	2.32277	14.4108	0.00302366	0.0351043
Zm00001d003085	-1.10883	5.74711	31.4251	0.000165874	0.00650024
Zm00001d053988	-1.1093	3.9554	31.2836	0.000169003	0.00655945
Zm00001d048223	-1.10945	4.49229	24.4597	0.000453949	0.011418
Zm00001d013081	-1.10946	4.05109	16.6267	0.00187133	0.0263229
Zm00001d022237	-1.11106	9.92101	17.0716	0.00170798	0.0249787
Zm00001d031434	-1.11107	7.47443	23.9659	0.000491293	0.011945
Zm00001d020681	-1.11135	3.1705	15.732	0.00225961	0.0295164
Zm00001d012707	-1.11178	1.82943	16.8437	0.00178945	0.0257064
Zm00001d007108	-1.11181	4.31654	24.0631	0.000483665	0.0118682
Zm00001d027684	-1.11201	3.31085	14.4509	0.00299638	0.0349447
Zm00001d012276	-1.11307	8.01328	21.5308	0.000738679	0.0149705
Zm00001d010451	-1.11321	7.70915	12.2597	0.00504312	0.0473943
Zm00001d013654	-1.11397	5.51084	22.3658	0.000640021	0.0138058
Zm00001d021653	-1.11414	7.07151	32.8733	0.000137494	0.00591464
Zm00001d011274	-1.11471	2.98117	16.8402	0.00179073	0.0257119
Zm00001d039713	-1.11746	2.62996	37.5111	7.85e-05	0.00427952
Zm00001d027763	-1.12013	3.90765	15.1999	0.00253599	0.0315437
Zm00001d037495	-1.12023	4.10857	36.5429	8.78e-05	0.00453049
Zm00001d004439	-1.12179	3.80748	25.244	0.00040132	0.0106631
Zm00001d047753	-1.12278	3.59817	15.3511	0.00245359	0.0308569
Zm00001d051529	-1.12329	6.36963	15.935	0.0021637	0.0287669
Zm00001d006045	-1.12552	1.95805	19.572	0.00105047	0.0187062
Zm00001d049525	-1.1262	5.15385	20.3569	0.000909699	0.0173105
Zm00001d027477	-1.1288	3.35899	25.2293	0.000402241	0.0106757
Zm00001d003725	-1.12915	6.36102	19.619	0.00104136	0.0186185
Zm00001d011468	-1.12947	5.52583	14.0936	0.00325071	0.0364254
Zm00001d040173	-1.12985	5.86454	17.758	0.00148798	0.0232472
Zm00001d003281	-1.13088	2.88605	24.7986	0.000430263	0.0111179
Zm00001d003719	-1.13158	1.50656	18.7562	0.00122512	0.0203865
Zm00001d022496	-1.13169	5.15239	39.4201	6.33e-05	0.00388847
Zm00001d026137	-1.13175	3.89405	18.9509	0.00118048	0.0199599
Zm00001d012165	-1.13237	3.64654	26.7943	0.00031709	0.00934214
Zm00001d010463	-1.13384	2.34517	25.7934	0.000368744	0.0101767
Zm00001d040399	-1.13597	6.38967	14.5849	0.00290711	0.0343669
Zm00001d002026	-1.13619	4.33373	36.0517	9.31e-05	0.00470239
Zm00001d027320	-1.13878	5.06562	22.6665	0.000608378	0.0134117
MSTRG.4911	-1.13918	1.62795	22.6991	0.000605061	0.0133906
Zm00001d043723	-1.13939	5.51613	24.9493	0.000420199	0.0109275
Zm00001d032114	-1.14049	8.45024	17.1961	0.00166535	0.0246862
Zm00001d018056	-1.14172	4.12873	22.8612	0.000588878	0.0131868
Zm00001d030101	-1.14323	4.11509	18.0538	0.00140363	0.0223353
Zm00001d020736	-1.14381	5.95905	12.934	0.00427274	0.0427677
Zm00001d007272	-1.14521	1.72623	13.4428	0.00378314	0.0395633
MSTRG.20592	-1.14562	3.11576	14.5183	0.00295107	0.0346699
Zm00001d022191	-1.14574	1.38683	15.1688	0.00255336	0.0316903
MSTRG.14338	-1.14581	3.46037	15.622	0.00231369	0.0299335
MSTRG.6923	-1.14594	3.6449	22.952	0.000580042	0.0130404
Zm00001d015064	-1.14854	3.02785	15.1098	0.00258667	0.0319082
Zm00001d018631	-1.14919	6.92161	21.5584	0.000735131	0.0149406
Zm00001d028742	-1.14973	7.43239	26.8564	0.000314183	0.00930405
Zm00001d027335	-1.15037	7.67783	20.0783	0.000956932	0.0178045
Zm00001d020537	-1.15258	5.32862	37.7356	7.65e-05	0.00427463
Zm00001d015348	-1.15339	6.33176	30.693	0.000182844	0.00688017
Zm00001d045661	-1.15369	5.8336	12.9134	0.0042942	0.0428706
Zm00001d038833	-1.15533	2.82914	15.6391	0.0023052	0.0298644
Zm00001d023419	-1.15718	2.13881	12.2999	0.00499286	0.0471249
Zm00001d034776	-1.15983	6.37675	23.1177	0.000564308	0.0128187
Zm00001d014459	-1.16019	7.62038	17.9119	0.00144337	0.0227634
Zm00001d010038	-1.16022	3.53737	53.7596	1.58e-05	0.0018447
Zm00001d051591	-1.16031	8.37664	14.9903	0.00265581	0.0324329
Zm00001d014993	-1.16047	7.29244	32.7503	0.000139668	0.00595489
Zm00001d044640	-1.16089	3.19046	38.2534	7.21e-05	0.00415104
Zm00001d006278	-1.16158	0.644584	16.0325	0.00211939	0.0284606
Zm00001d004894	-1.16394	9.52576	16.4611	0.00193679	0.0270294
MSTRG.29441	-1.16408	0.869142	14.7021	0.00283165	0.0337845
Zm00001d031270	-1.16566	3.77604	17.2638	0.00164271	0.0244574
Zm00001d004650	-1.16612	2.26972	19.8833	0.000991755	0.0181888
Zm00001d013139	-1.16615	6.2828	30.2465	0.000194204	0.0071188
Zm00001d051143	-1.16623	3.82591	14.0213	0.00330518	0.03676
Zm00001d035689	-1.16701	7.2173	22.183	0.000660213	0.0140843
Zm00001d025435	-1.16716	3.78288	15.2737	0.00249534	0.0311884
Zm00001d040634	-1.16721	2.76618	13.32	0.0038949	0.040316
Zm00001d014366	-1.16742	5.59458	23.4115	0.000537644	0.0126356
Zm00001d038718	-1.16911	5.43332	23.1429	0.000561961	0.0127961
Zm00001d007188	-1.16968	4.26049	12.707	0.00451538	0.0442981
Zm00001d035629	-1.1697	4.35646	37.0046	8.32e-05	0.0044247
Zm00001d037682	-1.17083	4.59224	19.5628	0.00105227	0.0187062
Zm00001d017531	-1.17085	3.49511	16.4016	0.001961	0.0271329
Zm00001d030346	-1.17121	5.381	13.8877	0.00340891	0.0374584
Zm00001d045538	-1.17346	5.3856	40.3989	5.69e-05	0.00370245
Zm00001d047901	-1.17373	3.50854	32.9488	0.000136179	0.00588975
Zm00001d008595	-1.17536	5.57455	32.3354	0.000147307	0.00610131
Zm00001d039648	-1.1759	4.84271	12.2111	0.00510481	0.0477526
Zm00001d008957	-1.17712	5.47754	28.9364	0.000232702	0.00794655
Zm00001d027589	-1.17789	3.65154	24.503	0.000450841	0.0114066
Zm00001d031287	-1.17819	4.0344	26.2968	0.000341613	0.0097214
Zm00001d006651	-1.179	6.70127	19.1789	0.00113065	0.0195573
Zm00001d028689	-1.18056	6.33529	43.0272	4.31e-05	0.00322835
Zm00001d018609	-1.18085	3.2591	30.2793	0.00019334	0.00711119
Zm00001d037871	-1.18142	3.86056	47.7829	2.7e-05	0.00252049
Zm00001d016059	-1.1816	5.3336	21.7092	0.000716161	0.0147989
MSTRG.11314	-1.18204	1.66848	16.6829	0.00184971	0.0261355
Zm00001d001812	-1.18494	6.02734	35.3987	0.000100602	0.00492115
Zm00001d037480	-1.18541	6.49465	25.66	0.000376357	0.0102476
Zm00001d046923	-1.18564	6.7268	37.6942	7.69e-05	0.00427463
Zm00001d007351	-1.18576	3.13377	24.538	0.000448344	0.011389
Zm00001d022259	-1.18616	4.8069	24.873	0.00042526	0.0110174
Zm00001d003429	-1.18665	11.1892	16.0564	0.00210868	0.0284084
Zm00001d014419	-1.18716	4.23772	45.5174	3.36e-05	0.00283315
Zm00001d016185	-1.18945	6.95	18.8578	0.00120156	0.0201244
Zm00001d020585	-1.19053	6.96474	15.5984	0.00232551	0.0300179
Zm00001d016683	-1.1908	2.44067	26.4253	0.000335066	0.00962452
Zm00001d051543	-1.19221	7.64476	26.4495	0.000333853	0.00961633
Zm00001d037328	-1.19248	6.43526	19.2164	0.0011227	0.0194914
Zm00001d018080	-1.19563	5.88109	14.4505	0.00299663	0.0349447
Zm00001d051130	-1.1963	5.81121	38.7876	6.79e-05	0.00404877
Zm00001d007832	-1.19814	5.38717	28.4121	0.000250603	0.00833497
Zm00001d050156	-1.19848	5.2469	22.0016	0.000680992	0.0143758
Zm00001d002788	-1.19853	3.25199	13.0653	0.00413955	0.041826
MSTRG.14850	-1.20014	0.421286	12.5322	0.00471339	0.0455478
Zm00001d031659	-1.20042	6.59928	37.6661	7.71e-05	0.00427463
Zm00001d015569	-1.20055	8.30755	25.6297	0.000378109	0.0102479
Zm00001d033132	-1.20109	9.39878	13.1404	0.00406555	0.0414218
Zm00001d014032	-1.20183	4.71191	18.1558	0.00137588	0.022032
Zm00001d043420	-1.20201	5.52031	24.1128	0.000479818	0.0118265
Zm00001d018065	-1.20234	3.45671	24.1362	0.000478018	0.0118139
Zm00001d032419	-1.20416	2.18088	25.1622	0.000406457	0.0107274
Zm00001d053099	-1.20487	3.88805	17.349	0.0016147	0.0243277
Zm00001d020869	-1.20596	3.15377	23.8873	0.000497565	0.0120144
Zm00001d039391	-1.20622	3.66425	32.5381	0.000143514	0.00598791
Zm00001d029125	-1.2067	2.27611	19.5202	0.00106066	0.0187964
Zm00001d027411	-1.20721	7.69056	16.7737	0.00181537	0.0259014
Zm00001d029263	-1.20746	3.38797	23.124	0.000563726	0.0128157
Zm00001d028796	-1.20879	4.62685	37.0297	8.3e-05	0.0044247
Zm00001d012231	-1.20902	5.62949	51.8723	1.86e-05	0.00203844
Zm00001d038220	-1.20911	1.92405	12.0768	0.00527998	0.0489075
Zm00001d048055	-1.20944	5.31538	23.2879	0.000548675	0.0126356
Zm00001d007869	-1.2096	4.51645	15.4533	0.00239964	0.0305029
Zm00001d051206	-1.20992	5.66139	39.0358	6.61e-05	0.0039716
Zm00001d034875	-1.21103	2.63035	24.8679	0.000425598	0.0110174
Zm00001d032922	-1.21196	4.04391	31.8326	0.000157239	0.00636402
Zm00001d029897	-1.212	4.16574	14.4492	0.00299752	0.0349447
Zm00001d032576	-1.21201	6.14893	25.7523	0.00037107	0.0102015
Zm00001d047186	-1.21229	7.19005	25.1665	0.000406186	0.0107274
Zm00001d017540	-1.21287	4.84043	58.9863	1.03e-05	0.00145948
Zm00001d010179	-1.21296	5.30239	17.2111	0.00166031	0.0246243
Zm00001d032728	-1.21307	6.75058	18.6636	0.00124704	0.0205523
Zm00001d006358	-1.21323	4.02613	25.9853	0.000358107	0.0100002
Zm00001d051778	-1.2135	2.34835	18.731	0.00123102	0.0204368
Zm00001d021300	-1.21483	8.52071	19.1598	0.00113473	0.0195758
Zm00001d043615	-1.21544	4.47573	21.5708	0.000733551	0.0149346
Zm00001d009134	-1.21571	2.78334	18.0855	0.00139494	0.022222
Zm00001d016085	-1.21589	3.04987	20.4287	0.000897969	0.0171612
Zm00001d046357	-1.21728	9.07117	28.2543	0.000256307	0.00836129
Zm00001d029075	-1.21771	5.98775	36.9986	8.33e-05	0.0044247
Zm00001d043422	-1.21833	3.33616	14.6244	0.00288141	0.034177
Zm00001d000402	-1.21932	3.33415	22.7103	0.000603932	0.0133761
MSTRG.8147	-1.21932	1.83991	25.243	0.000401388	0.0106631
Zm00001d051478	-1.22377	7.54142	25.6961	0.000374276	0.0102302
Zm00001d048451	-1.22595	5.29358	18.0201	0.00141296	0.0224459
Zm00001d025901	-1.22596	4.4816	17.0935	0.0017004	0.0249347
Zm00001d038761	-1.22638	3.26556	13.8658	0.00342625	0.0375646
Zm00001d006879	-1.22866	5.15311	30.5928	0.000185323	0.00692751
Zm00001d020017	-1.22876	4.13934	21.9039	0.000692513	0.0145537
Zm00001d027346	-1.23041	5.2661	18.1427	0.00137941	0.0220414
Zm00001d035987	-1.23157	2.95591	28.9739	0.00023148	0.00793184
Zm00001d052918	-1.23243	0.962542	19.1968	0.00112684	0.0195182
MSTRG.22546	-1.23301	4.91433	14.8202	0.00275795	0.0331281
Zm00001d025406	-1.23315	6.27029	27.2033	0.000298486	0.00900723
Zm00001d037338	-1.23332	5.1049	14.8252	0.0027549	0.0331055
Zm00001d039251	-1.23565	3.45388	31.6401	0.000161248	0.00643286
Zm00001d002772	-1.23714	4.20896	34.0552	0.000118524	0.0053977
Zm00001d022965	-1.23958	6.61461	18.3229	0.0013318	0.0214814
Zm00001d005624	-1.23966	5.52388	32.6547	0.000141384	0.00596513
Zm00001d036770	-1.24003	4.56815	19.8722	0.000993767	0.0181904
Zm00001d011834	-1.24324	5.7608	23.5336	0.00052701	0.0125229
Zm00001d053139	-1.24344	1.85185	15.0522	0.0026197	0.0322203
MSTRG.7032	-1.2437	0.942746	18.5513	0.00127426	0.0207991
Zm00001d032570	-1.24432	2.11515	12.6838	0.00454104	0.0444577
Zm00001d036046	-1.24554	9.04055	14.2281	0.003152	0.0359584
Zm00001d029580	-1.2456	2.14946	16.6004	0.00188155	0.0264536
MSTRG.11339	-1.24817	2.07311	13.9103	0.00339111	0.0373776
Zm00001d015407	-1.24854	2.79334	38.1874	7.27e-05	0.00415914
Zm00001d026268	-1.25021	2.47908	13.0597	0.00414512	0.0418491
Zm00001d043291	-1.25044	3.73198	12.6978	0.00452554	0.0443534
Zm00001d025241	-1.25079	5.57259	38.235	7.23e-05	0.0041513
Zm00001d044826	-1.25331	5.03622	30.5294	0.000186911	0.00695024
Zm00001d034416	-1.25416	3.16441	28.3162	0.000254054	0.00836129
Zm00001d023929	-1.25455	8.12855	16.5251	0.0019112	0.0267379
MSTRG.11816	-1.25523	2.52181	14.1954	0.00317566	0.0360874
Zm00001d044476	-1.2565	5.35378	28.2052	0.000258115	0.0083694
Zm00001d046330	-1.25667	5.22063	32.4234	0.000145645	0.00605899
Zm00001d032688	-1.25737	5.94916	55.0436	1.42e-05	0.00171126
Zm00001d027695	-1.26024	2.21345	12.7001	0.00452297	0.0443534
Zm00001d030361	-1.26031	4.82989	16.5065	0.00191857	0.0268147
Zm00001d019560	-1.2607	6.61318	32.9303	0.0001365	0.00589464
Zm00001d013814	-1.26135	2.7195	25.0281	0.000415054	0.0108235
Zm00001d047573	-1.26181	4.26609	33.6144	0.000125212	0.00560333
Zm00001d030250	-1.26204	2.36438	23.4018	0.000538507	0.0126356
Zm00001d017530	-1.26241	3.05991	18.6698	0.00124555	0.0205523
Zm00001d053004	-1.26369	3.68543	26.5766	0.000327556	0.00952159
Zm00001d012438	-1.2641	4.22651	28.6531	0.000242179	0.00816047
Zm00001d037974	-1.26453	2.19109	14.1949	0.00317603	0.0360874
Zm00001d049831	-1.26638	3.38138	19.3689	0.00109102	0.0191207
Zm00001d042141	-1.26922	2.93863	28.0489	0.000263965	0.00846059
MSTRG.24035	-1.26968	4.80998	16.8685	0.00178035	0.0256231
Zm00001d009425	-1.27122	2.26981	19.495	0.00106565	0.0188612
MSTRG.5160	-1.27335	1.2043	12.0424	0.00532598	0.0491326
Zm00001d034984	-1.27402	2.03611	18.8972	0.0011926	0.0200748
Zm00001d051699	-1.27586	2.05269	15.3266	0.00246668	0.0309393
Zm00001d039240	-1.27723	1.6664	31.7242	0.000159482	0.00643286
Zm00001d034414	-1.27929	6.0937	30.4082	0.000189995	0.00703727
Zm00001d036558	-1.27936	4.94468	17.6189	0.00152971	0.0235746
Zm00001d042905	-1.27953	6.49521	15.3686	0.00244422	0.0308073
Zm00001d027760	-1.27986	5.67295	32.6299	0.000141835	0.00596513
Zm00001d012167	-1.28441	5.78545	27.249	0.000296489	0.00896801
Zm00001d023288	-1.28738	3.37526	13.8252	0.00345867	0.0377773
Zm00001d031253	-1.28832	6.56083	21.5901	0.000731103	0.0149122
Zm00001d004635	-1.28866	5.10031	69.4668	4.76e-06	0.000951971
Zm00001d016036	-1.28903	5.13586	48.7301	2.47e-05	0.00242411
MSTRG.30033	-1.29245	1.79619	30.1504	0.000196756	0.0071845
Zm00001d002860	-1.294	3.95296	16.9488	0.00175132	0.0254011
Zm00001d012535	-1.29401	7.23205	17.4345	0.00158717	0.0241546
Zm00001d012408	-1.29735	4.2737	28.3236	0.000253783	0.00836129
Zm00001d028414	-1.29854	4.40515	26.0017	0.000357215	0.00999496
Zm00001d040441	-1.30038	4.44904	36.5841	8.74e-05	0.00452515
Zm00001d044605	-1.30076	2.97209	24.2671	0.000468099	0.0116295
Zm00001d033308	-1.30315	3.232	46.32	3.11e-05	0.00271115
Zm00001d037337	-1.3044	4.98976	55.1004	1.41e-05	0.00171042
Zm00001d052104	-1.30488	2.84627	13.4314	0.00379333	0.0396149
Zm00001d046289	-1.30744	1.86682	14.8534	0.00273764	0.0330232
Zm00001d029970	-1.3114	4.37462	31.3487	0.000167555	0.00653003
Zm00001d013022	-1.31363	3.68632	31.321	0.000168168	0.00653598
Zm00001d004513	-1.3154	5.51711	25.031	0.000414864	0.0108235
Zm00001d039101	-1.31619	2.10433	17.2847	0.00163579	0.0244574
Zm00001d051364	-1.31742	1.5492	15.313	0.00247403	0.0310041
Zm00001d043938	-1.31861	5.1883	26.9504	0.000309832	0.00924348
Zm00001d008930	-1.32225	3.76485	34.06	0.000118454	0.0053977
Zm00001d012353	-1.32378	7.64813	31.6615	0.000160797	0.00643286
Zm00001d034818	-1.32555	7.29804	17.1727	0.00167326	0.0247723
Zm00001d021967	-1.32601	1.50144	13.9976	0.0033233	0.0368609
Zm00001d049081	-1.3273	4.09671	27.3637	0.000291543	0.00890433
Zm00001d000320	-1.32974	3.48829	13.5946	0.00365018	0.0389188
Zm00001d043728	-1.33229	2.87871	19.1568	0.00113537	0.0195758
Zm00001d047921	-1.33399	0.327177	14.1584	0.00320268	0.0362367
Zm00001d009097	-1.3363	4.37702	27.9098	0.000269305	0.00854667
Zm00001d009698	-1.33689	1.97464	18.8396	0.00120574	0.0201705
Zm00001d051001	-1.33722	5.57019	21.6521	0.000723279	0.0148336
Zm00001d015129	-1.33911	3.53375	36.8908	8.43e-05	0.00445546
Zm00001d034298	-1.34129	4.52687	49.1203	2.38e-05	0.00237346
Zm00001d052223	-1.34363	1.41901	13.1047	0.00410058	0.0415962
Zm00001d051923	-1.34398	8.09886	20.8834	0.000827748	0.0162863
MSTRG.8432	-1.34491	3.34868	16.8979	0.00176965	0.0255276
Zm00001d032480	-1.34726	4.00678	28.2174	0.000257664	0.0083694
Zm00001d044465	-1.34767	3.81305	65.5439	6.28e-06	0.00112696
MSTRG.26479	-1.34855	2.59154	16.5924	0.00188466	0.0264754
Zm00001d019303	-1.34999	1.32896	12.7762	0.00443968	0.0438742
Zm00001d032651	-1.35238	5.07722	49.5871	2.28e-05	0.00233529
Zm00001d049722	-1.35353	0.208191	11.9962	0.00538852	0.0495088
MSTRG.15820	-1.35489	1.97341	12.0379	0.00533197	0.0491643
Zm00001d004855	-1.35621	4.53339	30.2734	0.000193495	0.00711119
MSTRG.4185	-1.35829	4.74967	33.3243	0.000129857	0.00574776
MSTRG.23624	-1.35836	2.2452	24.3862	0.000459293	0.0115218
Zm00001d008209	-1.36015	5.85901	30.861	0.000178773	0.00678093
Zm00001d053220	-1.36167	5.22044	17.4207	0.00159159	0.0241608
MSTRG.19496	-1.36177	4.4506	13.2624	0.00394873	0.0406065
Zm00001d010304	-1.36265	6.24931	13.4063	0.00381599	0.0397247
Zm00001d019398	-1.36321	3.27289	25.0413	0.0004142	0.0108218
Zm00001d044242	-1.36358	4.77356	21.8787	0.000695525	0.0145742
Zm00001d046995	-1.3667	5.88621	38.8118	6.77e-05	0.00404877
MSTRG.9737	-1.36684	0.897643	20.0688	0.000958602	0.0178227
Zm00001d051389	-1.36723	6.38494	28.1757	0.000259205	0.00839517
Zm00001d017706	-1.36941	1.50555	18.8926	0.00119365	0.0200748
Zm00001d034067	-1.37049	3.58618	22.1305	0.000666154	0.014185
Zm00001d052586	-1.37107	1.69031	29.7438	0.000208012	0.00741323
Zm00001d031893	-1.37145	8.32041	28.532	0.000246369	0.00826241
Zm00001d011112	-1.37415	1.18699	14.8719	0.00272643	0.0329447
Zm00001d030317	-1.37435	2.29432	26.5191	0.000330387	0.00954923
Zm00001d006950	-1.37592	4.27313	44.1855	3.83e-05	0.00310747
Zm00001d002806	-1.37663	3.30586	32.6127	0.000142147	0.00596513
Zm00001d043101	-1.3789	3.10314	40.0283	5.92e-05	0.00376807
Zm00001d002934	-1.38113	2.40318	23.3039	0.000547234	0.0126356
Zm00001d034715	-1.38153	6.04674	49.7502	2.25e-05	0.00231381
Zm00001d006875	-1.38388	6.47564	30.5347	0.000186779	0.00695024
Zm00001d016154	-1.38408	3.35801	24.1425	0.000477536	0.0118122
Zm00001d052741	-1.38586	5.0154	21.3315	0.000764819	0.0153788
Zm00001d036877	-1.38673	5.61466	19.382	0.00108836	0.0191083
Zm00001d004480	-1.38809	2.506	42.7651	4.43e-05	0.00327103
Zm00001d016721	-1.38857	2.07519	23.4733	0.000532233	0.012584
Zm00001d035300	-1.38967	2.11146	21.7223	0.000714545	0.0147763
Zm00001d035963	-1.39061	4.77649	43.7571	4e-05	0.00318421
Zm00001d004614	-1.39201	3.38575	36.4975	8.83e-05	0.00453406
Zm00001d021412	-1.39362	4.81477	26.668	0.000323115	0.00944122
MSTRG.23759	-1.39365	7.19039	20.0005	0.000970655	0.0179689
Zm00001d023932	-1.39433	1.72595	19.1573	0.00113526	0.0195758
Zm00001d009060	-1.39461	6.14247	34.9252	0.000106526	0.00507097
Zm00001d032443	-1.39478	7.01887	26.5565	0.000328542	0.00952159
Zm00001d017333	-1.39485	4.14274	66.3857	5.91e-06	0.00108689
Zm00001d043943	-1.39624	1.42282	19.9521	0.000979299	0.0180653
Zm00001d039579	-1.39681	2.84788	34.9969	0.000105602	0.00506959
Zm00001d015759	-1.3983	2.98228	16.0322	0.00211951	0.0284606
Zm00001d024166	-1.39839	1.53261	14.8943	0.00271291	0.0328234
Zm00001d039771	-1.39873	2.94136	38.6746	6.88e-05	0.00407458
Zm00001d038153	-1.39934	5.79974	17.616	0.0015306	0.0235756
Zm00001d049020	-1.39947	1.81231	20.0462	0.000962565	0.0178847
Zm00001d052636	-1.39997	2.24923	17.4253	0.00159012	0.0241608
Zm00001d015008	-1.40545	3.36962	34.0835	0.000118109	0.0053977
Zm00001d012953	-1.40573	2.46392	16.0067	0.00213101	0.0285194
Zm00001d013231	-1.40627	3.66818	20.4594	0.000893007	0.0171192
Zm00001d017822	-1.40658	1.96349	18.8732	0.00119806	0.0201014
Zm00001d005821	-1.40879	3.15068	42.0089	4.79e-05	0.0034066
Zm00001d034674	-1.40955	4.21974	12.4085	0.00485982	0.0464565
Zm00001d048737	-1.4101	4.38184	20.1256	0.000948725	0.017748
Zm00001d013873	-1.41035	3.33632	34.4856	0.000112399	0.00527105
Zm00001d038794	-1.41251	4.27013	37.501	7.86e-05	0.00427952
Zm00001d012096	-1.41346	0.207525	16.2686	0.00201637	0.0275809
Zm00001d041404	-1.41551	4.08796	36.0139	9.35e-05	0.00470239
Zm00001d041476	-1.41646	2.60919	50.0651	2.19e-05	0.00227278
Zm00001d042087	-1.41654	3.54717	29.2703	0.000222092	0.00776008
Zm00001d025382	-1.41716	6.70753	23.2952	0.000548019	0.0126356
Zm00001d002342	-1.41804	5.61909	20.1923	0.000937254	0.0176128
Zm00001d015636	-1.41991	1.66882	18.6317	0.0012547	0.0206129
Zm00001d032973	-1.42021	6.88678	51.4328	1.93e-05	0.00208692
Zm00001d052054	-1.42149	3.0296	28.2727	0.000255635	0.00836129
MSTRG.22662	-1.42212	0.753253	12.8461	0.00436489	0.0433464
Zm00001d003463	-1.42436	2.22815	39.7147	6.13e-05	0.00384746
Zm00001d021667	-1.42488	5.74984	52.5991	1.75e-05	0.00195043
Zm00001d039790	-1.42563	7.25499	22.2099	0.000657197	0.0140618
Zm00001d042050	-1.4262	8.82954	15.6291	0.00231014	0.0299147
Zm00001d003161	-1.42675	3.3155	56.2314	1.28e-05	0.00163412
Zm00001d046223	-1.42899	4.21572	33.8619	0.000121403	0.00546737
Zm00001d044970	-1.42912	4.58366	22.7975	0.000595181	0.013286
Zm00001d025586	-1.42935	5.51685	24.2081	0.000472541	0.0117296
Zm00001d007896	-1.43043	5.60587	57.8188	1.13e-05	0.00154744
Zm00001d017069	-1.43508	3.37378	53.0256	1.68e-05	0.00190952
Zm00001d026068	-1.43599	7.51289	32.5793	0.000142758	0.00596513
Zm00001d018638	-1.4378	3.16625	17.5591	0.00154807	0.0237572
Zm00001d038969	-1.43888	4.99803	17.8897	0.00144971	0.0228507
Zm00001d002074	-1.43948	1.59941	22.5206	0.000623491	0.0135975
Zm00001d033279	-1.44024	2.63709	40.6197	5.56e-05	0.00366572
Zm00001d007935	-1.44219	3.43784	15.2345	0.00251683	0.0313741
Zm00001d020732	-1.44255	6.2488	24.7481	0.0004337	0.0111512
Zm00001d017638	-1.44319	3.36621	37.9747	7.44e-05	0.0042219
Zm00001d051872	-1.44451	5.66994	13.5662	0.00367461	0.0390034
MSTRG.23185	-1.44455	2.95741	26.6825	0.000322415	0.00944122
Zm00001d042953	-1.44595	5.36945	42.7235	4.45e-05	0.00327103
MSTRG.23615	-1.44665	2.62444	20.5364	0.000880722	0.0170125
Zm00001d014496	-1.44813	4.22988	67.554	5.44e-06	0.00102216
Zm00001d038742	-1.45023	0.588253	13.9951	0.00332526	0.0368609
Zm00001d027488	-1.45132	11.005	21.0349	0.000805809	0.0159654
Zm00001d013410	-1.45158	5.81006	27.8771	0.00027058	0.00856795
Zm00001d003411	-1.45269	4.45571	28.2204	0.000257555	0.0083694
Zm00001d021200	-1.4532	3.73517	85.4452	1.76e-06	0.000530723
Zm00001d050889	-1.4535	5.09711	22.3665	0.000639949	0.0138058
MSTRG.18210	-1.45688	1.26299	18.5779	0.00126773	0.0207548
Zm00001d043929	-1.45802	7.98944	30.3727	0.000190911	0.00706195
Zm00001d020147	-1.46029	5.44421	29.0863	0.000227867	0.00785547
Zm00001d028680	-1.46376	3.55088	16.1001	0.00208928	0.0282176
Zm00001d037248	-1.46405	2.50316	33.2009	0.000131896	0.00578476
Zm00001d033790	-1.46951	7.13445	44.305	3.79e-05	0.00309693
Zm00001d020651	-1.46999	0.411321	20.6377	0.000864839	0.0167833
Zm00001d006282	-1.47035	2.00213	48.7948	2.46e-05	0.00242411
Zm00001d020610	-1.47394	2.44829	12.7766	0.00443935	0.0438742
Zm00001d027313	-1.47447	3.10744	12.9652	0.00424063	0.0425442
Zm00001d015744	-1.47549	2.59853	43.667	4.04e-05	0.00318421
Zm00001d028172	-1.47642	6.95995	12.8798	0.00432925	0.0430681
Zm00001d039081	-1.47676	4.48836	21.6027	0.000729496	0.0149085
MSTRG.18583	-1.47731	2.01308	22.5158	0.000623994	0.0135975
Zm00001d036431	-1.47911	4.74237	24.5272	0.000449111	0.011389
MSTRG.8003	-1.48144	3.83136	28.9119	0.000233505	0.00795129
Zm00001d017528	-1.4824	6.34229	38.7238	6.84e-05	0.00406921
Zm00001d048309	-1.48335	2.74195	13.326	0.0038894	0.0402738
Zm00001d010422	-1.48477	2.06011	22.0206	0.000678783	0.014367
Zm00001d034546	-1.48619	5.44373	35.037	0.00010509	0.00505358
ENSRNA049466250	-1.48676	6.48911	29.5908	0.000212441	0.00751542
Zm00001d016522	-1.48889	0.511884	13.0007	0.00420445	0.0422472
Zm00001d035322	-1.48904	1.48424	30.0111	0.000200529	0.00725804
Zm00001d038135	-1.48941	4.11424	21.5496	0.000736257	0.0149461
Zm00001d013038	-1.49027	3.31083	27.5603	0.000283296	0.00877154
Zm00001d050346	-1.49245	4.23825	43.5567	4.09e-05	0.00318421
Zm00001d025314	-1.49292	1.83477	24.8833	0.000424571	0.0110109
Zm00001d013979	-1.49332	6.07552	50.5339	2.1e-05	0.00221918
Zm00001d017785	-1.49368	5.34879	19.8447	0.000998805	0.0182473
Zm00001d043458	-1.49382	6.06224	14.2969	0.00310295	0.035628
Zm00001d042438	-1.49665	3.66821	13.5892	0.00365481	0.0389389
Zm00001d026530	-1.49833	5.83286	24.5834	0.000445132	0.0113267
Zm00001d017495	-1.49857	4.01186	19.8321	0.00100113	0.0182781
MSTRG.11722	-1.50091	0.171993	12.2426	0.00506474	0.0475188
Zm00001d032961	-1.50181	1.76252	13.9942	0.00332595	0.0368609
Zm00001d009081	-1.50193	2.95715	23.9099	0.000495753	0.0119911
Zm00001d053020	-1.5031	3.91302	19.6084	0.0010434	0.0186185
Zm00001d037688	-1.50316	3.71985	30.9364	0.000176982	0.00674912
Zm00001d044132	-1.50335	2.39751	13.8589	0.00343174	0.0375646
Zm00001d053015	-1.50381	7.61691	17.4807	0.00157256	0.0240405
Zm00001d032504	-1.50388	5.89252	59.6421	9.77e-06	0.00143648
Zm00001d037494	-1.50472	2.96272	19.3787	0.00108904	0.0191083
MSTRG.23878	-1.50534	-0.0934576	14.7647	0.00279232	0.0334243
Zm00001d028510	-1.50629	4.1111	58.7494	1.05e-05	0.00147967
Zm00001d044254	-1.50639	0.741145	13.4666	0.00376188	0.0394282
Zm00001d020977	-1.50793	1.67114	16.2511	0.00202382	0.0276498
MSTRG.23492	-1.5081	3.3291	27.747	0.000275717	0.00866224
Zm00001d028714	-1.51036	5.73736	27.0312	0.000306154	0.00916265
MSTRG.2226	-1.51105	1.42996	12.0832	0.00527149	0.0488608
Zm00001d011787	-1.51109	5.57843	34.3031	0.000114948	0.00532895
Zm00001d013144	-1.51123	0.845025	31.9219	0.000155418	0.00629933
Zm00001d004013	-1.51388	1.97762	29.1981	0.000224336	0.00779053
Zm00001d032024	-1.51535	5.64575	18.152	0.00137691	0.022032
Zm00001d007345	-1.51577	7.28609	27.2693	0.000295605	0.00896037
Zm00001d014852	-1.51598	4.4385	48.593	2.5e-05	0.00244078
Zm00001d002993	-1.51757	4.77705	37.9514	7.46e-05	0.0042219
Zm00001d024717	-1.51864	1.79392	22.1061	0.000668925	0.014195
MSTRG.4275	-1.51887	1.48111	17.233	0.00165296	0.0245449
Zm00001d051506	-1.52805	1.15049	13.8235	0.00346006	0.0377773
MSTRG.13695	-1.53011	1.97971	19.8637	0.000995321	0.0182071
Zm00001d026594	-1.53019	3.51043	40.1125	5.87e-05	0.00375048
Zm00001d026415	-1.53189	6.81053	43.1587	4.25e-05	0.00322215
Zm00001d016756	-1.53198	3.54436	21.6649	0.000721679	0.0148336
Zm00001d031421	-1.53333	7.44717	23.5634	0.000524452	0.0125139
Zm00001d044538	-1.53343	3.76536	18.9859	0.00117266	0.0199301
Zm00001d041927	-1.54324	4.15804	43.2022	4.24e-05	0.00322215
Zm00001d037644	-1.54557	3.04505	53.6	1.6e-05	0.00184725
Zm00001d010832	-1.55035	4.17194	16.5207	0.00191292	0.0267488
Zm00001d023781	-1.55574	6.23175	39.4598	6.3e-05	0.00388847
Zm00001d029747	-1.55868	5.92586	31.6186	0.000161704	0.00643286
Zm00001d006590	-1.55919	4.68637	17.8106	0.00147256	0.0230571
Zm00001d020540	-1.56574	3.43454	21.4963	0.000743128	0.0150082
Zm00001d014319	-1.57065	5.38649	24.9287	0.000421558	0.0109428
Zm00001d046510	-1.57219	4.28845	22.3367	0.000643187	0.0138246
Zm00001d022374	-1.57871	4.67153	95.7112	1.01e-06	0.00036227
Zm00001d005905	-1.58227	2.70622	34.0048	0.000119267	0.00542284
Zm00001d041990	-1.58244	1.23787	15.6125	0.00231842	0.0299673
Zm00001d016741	-1.58254	3.33666	28.5642	0.000245247	0.00824424
Zm00001d042723	-1.58532	6.7545	35.1362	0.000103836	0.00502737
MSTRG.1894	-1.58761	3.5018	18.6656	0.00124656	0.0205523
Zm00001d022085	-1.58948	3.39089	41.9425	4.83e-05	0.0034066
Zm00001d039988	-1.59244	1.84807	39.4375	6.32e-05	0.00388847
MSTRG.12227	-1.59429	4.55418	17.5585	0.00154825	0.0237572
Zm00001d042307	-1.59475	0.538479	12.9185	0.00428881	0.0428609
Zm00001d051110	-1.59495	5.27291	58.0238	1.11e-05	0.00153707
Zm00001d021016	-1.59507	5.14665	42.7223	4.45e-05	0.00327103
Zm00001d010366	-1.59782	3.73963	69.8122	4.65e-06	0.00093636
Zm00001d038352	-1.59819	5.56387	11.9323	0.00547641	0.0499237
Zm00001d047252	-1.59823	4.74037	20.9452	0.00081871	0.0161758
Zm00001d048353	-1.59993	4.53091	37.618	7.75e-05	0.00427881
Zm00001d034692	-1.60282	5.23261	37.7062	7.68e-05	0.00427463
Zm00001d025759	-1.60354	0.816573	13.6549	0.00359896	0.0387219
Zm00001d032613	-1.6039	4.91975	37.6803	7.7e-05	0.00427463
Zm00001d012274	-1.60392	7.03945	48.7479	2.47e-05	0.00242411
Zm00001d015131	-1.60559	4.69935	14.6548	0.00286183	0.0339994
Zm00001d049220	-1.60587	1.21378	27.1726	0.000299837	0.0090149
Zm00001d044074	-1.6088	2.1462	22.5023	0.000625426	0.0136078
Zm00001d001126	-1.6091	0.201437	17.7986	0.00147606	0.0230864
Zm00001d033446	-1.60922	1.15478	13.9245	0.00337995	0.037299
Zm00001d000222	-1.62247	7.69914	39.3337	6.39e-05	0.00389945
Zm00001d049221	-1.62308	1.02159	20.6638	0.000860814	0.0167281
Zm00001d026431	-1.62382	1.7559	48.8959	2.43e-05	0.00241466
Zm00001d002094	-1.62399	7.40536	25.6008	0.000379793	0.0102532
Zm00001d019450	-1.62709	5.15356	25.6128	0.000379092	0.0102532
Zm00001d010755	-1.62869	3.20828	40.8045	5.45e-05	0.0036165
Zm00001d049688	-1.62944	-0.00681324	12.1047	0.00524303	0.0486765
Zm00001d052883	-1.63995	-0.0103344	19.6655	0.00103241	0.0185468
Zm00001d047944	-1.64386	1.66611	27.2837	0.000294983	0.00895108
Zm00001d040188	-1.64573	3.85017	26.4077	0.000335954	0.00962798
Zm00001d028793	-1.64737	5.78941	38.3483	7.14e-05	0.00413706
MSTRG.22569	-1.64815	3.25328	13.1597	0.00404681	0.0413156
Zm00001d042260	-1.65112	2.18072	17.4327	0.00158777	0.0241546
Zm00001d052324	-1.65115	2.22326	29.2056	0.000224102	0.00779053
Zm00001d029195	-1.65359	4.01415	15.4452	0.00240386	0.0305178
Zm00001d045400	-1.65478	4.31221	18.6764	0.00124398	0.0205523
Zm00001d010275	-1.65503	2.1089	47.2851	2.83e-05	0.00260786
Zm00001d010434	-1.65919	3.21634	42.5227	4.54e-05	0.00331145
Zm00001d006397	-1.6608	5.27368	37.5749	7.79e-05	0.00427952
MSTRG.11352	-1.66532	1.5821	12.8865	0.00432228	0.0430437
MSTRG.20824	-1.66675	0.505126	16.8051	0.00180368	0.0258716
Zm00001d045685	-1.66919	7.16576	44.2646	3.8e-05	0.00309943
Zm00001d051362	-1.66964	7.762	23.2895	0.000548531	0.0126356
Zm00001d032405	-1.67088	3.19964	17.9617	0.00142928	0.022622
MSTRG.23184	-1.67166	1.15489	14.4448	0.00300048	0.0349609
Zm00001d017438	-1.67702	5.16939	36.8234	8.5e-05	0.00445546
Zm00001d027330	-1.67707	4.32871	35.6643	9.74e-05	0.00483747
Zm00001d006279	-1.67826	1.34594	42.3474	4.63e-05	0.00333171
MSTRG.15860	-1.68137	2.55255	34.9028	0.000106816	0.00507097
Zm00001d025343	-1.68485	2.85116	55.8887	1.32e-05	0.00165672
Zm00001d009775	-1.68489	1.4095	12.0087	0.00537147	0.0494253
Zm00001d052125	-1.68669	2.55791	36.7783	8.54e-05	0.00445546
MSTRG.6943	-1.68884	5.24622	23.3444	0.0005436	0.0126356
Zm00001d028630	-1.69184	4.65966	21.8986	0.000693141	0.0145537
Zm00001d037468	-1.69226	2.44688	11.9337	0.00547455	0.0499237
Zm00001d045304	-1.69246	3.22752	48.1244	2.62e-05	0.00248169
Zm00001d017994	-1.69483	2.19039	29.9338	0.000202661	0.00730609
Zm00001d008329	-1.69506	7.42034	25.4672	0.000387692	0.0104347
Zm00001d037342	-1.69624	4.78564	29.0568	0.000228809	0.00787835
Zm00001d027645	-1.70047	1.54927	31.3856	0.00016674	0.0065162
Zm00001d047253	-1.70256	10.1748	44.754	3.62e-05	0.00300433
Zm00001d041701	-1.70564	5.87392	42.5043	4.55e-05	0.00331145
MSTRG.23657	-1.71089	-0.0832324	16.0231	0.00212361	0.0284606
MSTRG.5154	-1.72051	3.34904	24.3396	0.000462717	0.0115769
Zm00001d014648	-1.72733	1.50858	12.3176	0.00497092	0.0470587
Zm00001d017041	-1.73269	0.909747	14.0413	0.00329001	0.0366775
Zm00001d003025	-1.73509	0.914263	19.574	0.00105009	0.0187062
Zm00001d024382	-1.73569	5.0653	53.1401	1.67e-05	0.00189856
MSTRG.14512	-1.74152	1.71799	14.9159	0.00269993	0.0327941
Zm00001d034017	-1.7417	9.70309	46.9251	2.93e-05	0.00265761
Zm00001d053225	-1.74208	-0.502308	14.4292	0.0030111	0.0350425
Zm00001d008187	-1.74414	1.21072	26.7269	0.000320289	0.00940708
Zm00001d029636	-1.74433	2.36609	32.5917	0.000142531	0.00596513
Zm00001d033466	-1.74447	0.00466552	14.897	0.00271127	0.0328234
Zm00001d011878	-1.7458	3.78618	37.9398	7.47e-05	0.0042219
Zm00001d045579	-1.74585	3.72989	65.2417	6.41e-06	0.00112802
Zm00001d036237	-1.74736	3.42322	14.0501	0.00328338	0.0366389
Zm00001d015921	-1.74966	6.67072	32.0943	0.000151973	0.00621295
Zm00001d026161	-1.75075	-0.134658	19.7066	0.00102459	0.0184733
Zm00001d023887	-1.75179	4.45112	72.8723	3.79e-06	0.000827566
Zm00001d024786	-1.75339	3.04639	29.4543	0.000216489	0.00761119
Zm00001d038285	-1.7551	2.45086	23.7724	0.000506911	0.012147
Zm00001d050180	-1.75954	2.22841	37.3183	8.03e-05	0.00433715
Zm00001d045721	-1.76338	3.73621	42.0364	4.78e-05	0.0034066
Zm00001d006054	-1.76538	1.09068	43.2237	4.23e-05	0.00322215
Zm00001d032285	-1.76684	0.565138	13.7838	0.00349221	0.0379709
Zm00001d033284	-1.77316	0.244346	16.0776	0.00209925	0.0283263
Zm00001d043520	-1.77369	5.10501	59.9697	9.53e-06	0.00140919
Zm00001d014492	-1.77488	1.10347	47.6125	2.74e-05	0.00255298
Zm00001d045048	-1.77509	6.33087	47.1629	2.86e-05	0.00262133
Zm00001d052906	-1.77795	1.5585	34.1286	0.000117451	0.0053977
Zm00001d029243	-1.78356	4.68862	41.9644	4.82e-05	0.0034066
Zm00001d023994	-1.78795	7.70722	30.1098	0.000197847	0.0072058
Zm00001d003797	-1.78982	4.43171	65.096	6.48e-06	0.00112802
Zm00001d017782	-1.79432	1.32962	17.4241	0.00159052	0.0241608
Zm00001d043581	-1.79511	5.75597	135.885	1.75e-07	0.00013418
Zm00001d028754	-1.79516	1.2539	19.968	0.000976441	0.0180245
Zm00001d039946	-1.79533	4.04691	85.9655	1.71e-06	0.000530723
Zm00001d009373	-1.79708	4.88747	57.1332	1.19e-05	0.00159186
Zm00001d012719	-1.80299	4.5069	61.7783	8.29e-06	0.00129943
Zm00001d046642	-1.80542	6.088	60.5025	9.14e-06	0.00137677
Zm00001d016625	-1.8079	4.51959	53.2427	1.65e-05	0.00189456
Zm00001d038645	-1.81261	0.106133	24.1475	0.00047715	0.0118122
MSTRG.11350	-1.81441	1.87893	19.2917	0.00110692	0.0193028
MSTRG.18612	-1.82104	1.38622	21.778	0.000707703	0.0146991
Zm00001d007228	-1.8235	6.0346	15.1772	0.00254867	0.0316598
Zm00001d010233	-1.82369	-0.335396	15.0841	0.00260137	0.0320339
Zm00001d020605	-1.82431	3.05891	18.9747	0.00117516	0.0199301
Zm00001d034143	-1.82439	6.08101	29.2573	0.000222494	0.007764
MSTRG.30719	-1.83155	1.00401	16.3392	0.00198676	0.0272991
Zm00001d047189	-1.8325	3.04188	15.5764	0.00233654	0.0300907
Zm00001d036991	-1.83535	0.0899846	13.86	0.00343087	0.0375646
Zm00001d019855	-1.83804	4.32208	31.3959	0.000166513	0.0065162
Zm00001d006285	-1.8389	2.45848	46.5681	3.03e-05	0.00269292
Zm00001d004451	-1.8534	2.80697	44.4409	3.74e-05	0.00306386
Zm00001d048649	-1.85645	0.42778	19.7212	0.00102183	0.0184562
Zm00001d038726	-1.85755	0.065894	14.1421	0.00321471	0.0362367
Zm00001d023242	-1.8613	2.74472	46.8666	2.95e-05	0.00265934
Zm00001d049161	-1.86355	3.72493	13.8899	0.00340711	0.0374584
Zm00001d042611	-1.86591	2.14143	34.9242	0.000106538	0.00507097
Zm00001d039414	-1.86735	6.36037	74.6427	3.38e-06	0.000761072
Zm00001d043579	-1.87033	8.60362	40.8374	5.43e-05	0.00361514
Zm00001d005010	-1.87986	0.873403	27.6973	0.00027771	0.00866799
MSTRG.11573	-1.88333	1.63854	14.0259	0.00330173	0.0367504
Zm00001d043242	-1.88349	5.48323	43.5581	4.08e-05	0.00318421
Zm00001d010813	-1.88435	0.454292	13.1663	0.00404044	0.041273
MSTRG.10503	-1.88654	-0.311101	16.4561	0.00193883	0.0270445
Zm00001d039496	-1.88845	3.78284	20.1729	0.000940577	0.0176612
MSTRG.5193	-1.89016	0.907221	30.1805	0.000195952	0.00716437
Zm00001d050039	-1.89161	0.917008	35.4708	9.97e-05	0.0049126
Zm00001d026486	-1.8965	3.07961	26.5498	0.00032887	0.00952159
MSTRG.29515	-1.90578	0.243258	21.2439	0.000776667	0.015529
Zm00001d033024	-1.90891	4.98095	16.8975	0.0017698	0.0255276
Zm00001d047168	-1.90969	-0.357462	12.973	0.00423267	0.0424795
Zm00001d023873	-1.91598	4.1351	35.7693	9.62e-05	0.00481502
Zm00001d048595	-1.91618	1.75255	22.7897	0.000595954	0.0132928
Zm00001d023804	-1.9166	3.37741	28.8992	0.000233921	0.00795129
Zm00001d044839	-1.92881	2.75828	13.4089	0.0038136	0.0397247
Zm00001d011902	-1.93296	4.56815	37.5635	7.8e-05	0.00427952
Zm00001d014918	-1.93444	7.20464	77.1016	2.89e-06	0.000701361
MSTRG.8430	-1.94004	-0.374717	14.8074	0.00276585	0.0331808
Zm00001d028348	-1.94198	4.30883	25.0408	0.000414227	0.0108218
Zm00001d038126	-1.94503	4.43805	47.3475	2.81e-05	0.00260088
MSTRG.5042	-1.94972	2.84051	43.1233	4.27e-05	0.00322215
Zm00001d052683	-1.95266	6.99691	13.4267	0.00379759	0.0396268
Zm00001d026160	-1.95569	7.54396	59.2394	1.01e-05	0.00145823
Zm00001d048214	-1.95608	2.29166	23.7984	0.000504784	0.012147
Zm00001d033514	-1.95781	1.28986	22.7553	0.000599392	0.0133171
Zm00001d014758	-1.9654	4.323	40.3167	5.74e-05	0.00370776
Zm00001d006137	-1.97263	0.0237159	23.2017	0.00055653	0.0127253
MSTRG.23467	-1.97342	1.67377	29.7343	0.000208283	0.00741323
Zm00001d041827	-1.97372	1.59766	26.5553	0.000328601	0.00952159
Zm00001d033671	-1.98084	3.01167	29.8446	0.000205152	0.00735849
Zm00001d021454	-1.98101	0.886311	20.4787	0.000889905	0.0170713
Zm00001d037209	-1.98142	1.09016	30.2799	0.000193326	0.00711119
Zm00001d050768	-1.98805	3.8787	161.856	7.18e-08	8.15e-05
Zm00001d021255	-1.98967	0.321442	14.1995	0.00317269	0.0360874
Zm00001d012325	-1.99049	5.04775	13.2152	0.00399341	0.0409308
Zm00001d032115	-1.99367	0.901037	18.5501	0.00127454	0.0207991
Zm00001d045454	-1.99658	0.935727	12.6517	0.00457699	0.0446555
Zm00001d024105	-1.99751	1.45824	19.3986	0.00108498	0.0190726
Zm00001d026859	-2.00467	4.74221	25.3343	0.000395742	0.0105725
MSTRG.10802	-2.00482	0.813065	13.9311	0.00337479	0.0372697
Zm00001d032230	-2.00623	2.79878	29.5693	0.000213072	0.00752837
Zm00001d033319	-2.01319	3.75671	40.524	5.61e-05	0.0036696
Zm00001d043244	-2.0134	1.45086	44.5842	3.68e-05	0.00303784
Zm00001d000360	-2.01376	1.1909	27.531	0.000284507	0.00878349
Zm00001d032407	-2.02419	3.2919	56.5445	1.25e-05	0.00162922
MSTRG.23546	-2.0336	1.07424	22.2114	0.000657022	0.0140618
Zm00001d018433	-2.03603	0.924931	16.7221	0.00183481	0.0260041
Zm00001d008898	-2.03654	3.60796	23.9757	0.000490521	0.011945
Zm00001d011757	-2.04859	-0.0653014	18.3012	0.00133743	0.02156
Zm00001d018917	-2.04944	2.6387	32.2082	0.000149748	0.00616638
Zm00001d044608	-2.0504	2.29041	16.5797	0.00188963	0.0265146
Zm00001d028025	-2.05698	3.74247	54.0763	1.54e-05	0.00181805
Zm00001d051802	-2.058	4.05619	39.3056	6.41e-05	0.00389945
MSTRG.11255	-2.0666	1.43752	20.3002	0.000919081	0.0174077
Zm00001d014820	-2.07319	4.54571	41.4142	5.1e-05	0.00353155
Zm00001d023869	-2.07345	5.61044	50.7766	2.05e-05	0.00218503
Zm00001d010459	-2.07447	1.10514	19.2041	0.00112529	0.0195058
Zm00001d031730	-2.08064	2.51572	54.9663	1.43e-05	0.00171269
Zm00001d022637	-2.08655	4.92286	61.8092	8.27e-06	0.00129943
Zm00001d051936	-2.09273	1.45512	39.2643	6.44e-05	0.00390528
Zm00001d049657	-2.09896	3.76159	65.2441	6.41e-06	0.00112802
MSTRG.14683	-2.10477	4.55713	16.7767	0.00181427	0.0259014
Zm00001d016408	-2.10685	2.80755	35.0903	0.000104414	0.00502961
Zm00001d016435	-2.11589	2.6387	51.3548	1.95e-05	0.00209345
MSTRG.19349	-2.12316	4.28761	41.4477	5.09e-05	0.00352766
Zm00001d029913	-2.12795	6.05366	35.8885	9.49e-05	0.00476446
MSTRG.14738	-2.1373	-0.233073	12.3687	0.00490812	0.0467653
MSTRG.6555	-2.139	-0.859432	12.5829	0.00465491	0.0451981
Zm00001d022478	-2.14106	1.84822	21.4231	0.000752672	0.0151775
MSTRG.11026	-2.14547	-0.17861	25.2138	0.000403213	0.0106757
Zm00001d012019	-2.14552	2.54896	57.3764	1.17e-05	0.00157318
Zm00001d009899	-2.1476	2.1267	30.6109	0.000184873	0.0069198
Zm00001d002989	-2.14994	1.39003	39.7986	6.07e-05	0.00384746
Zm00001d005174	-2.15782	3.71659	83.2788	1.99e-06	0.000554162
Zm00001d006446	-2.16349	5.3692	16.7116	0.00183875	0.0260325
Zm00001d007290	-2.16397	5.07475	56.7495	1.23e-05	0.00161979
Zm00001d007269	-2.1666	2.26797	29.8813	0.000204121	0.00733403
Zm00001d002620	-2.18331	-0.164669	27.191	0.000299028	0.00900723
Zm00001d036933	-2.18999	1.64327	12.5518	0.00469071	0.0454369
MSTRG.14718	-2.19784	3.35185	41.4927	5.06e-05	0.00351949
MSTRG.14719	-2.20157	3.35107	41.617	5e-05	0.00349063
Zm00001d040836	-2.21081	2.26481	13.5521	0.00368686	0.0390383
Zm00001d046134	-2.22266	2.82486	29.9607	0.000201915	0.00728847
Zm00001d030253	-2.24214	0.354752	19.1733	0.00113186	0.0195573
Zm00001d019957	-2.25248	0.397599	29.0105	0.000230298	0.00790086
Zm00001d021736	-2.25643	2.42524	21.9893	0.000682431	0.0143955
Zm00001d003142	-2.26414	0.510055	39.1801	6.5e-05	0.00393347
Zm00001d013561	-2.2881	4.01839	45.3884	3.4e-05	0.00284649
MSTRG.10384	-2.30552	0.605533	12.6782	0.00454734	0.0444778
Zm00001d013143	-2.30859	-0.910186	13.0674	0.0041375	0.0418238
Zm00001d038049	-2.32412	7.28323	13.28	0.00393219	0.0405098
Zm00001d020383	-2.33011	-0.492518	18.8331	0.00120725	0.0201839
Zm00001d048643	-2.33073	2.72231	32.7264	0.000140093	0.00595911
Zm00001d027757	-2.33554	0.780586	22.5272	0.000622806	0.0135975
Zm00001d053156	-2.33779	1.87283	31.0013	0.000175456	0.00669992
Zm00001d038699	-2.35331	5.2686	18.4156	0.00130809	0.0212195
MSTRG.11325	-2.36511	0.41082	23.4732	0.000532244	0.012584
Zm00001d006539	-2.37143	0.870326	17.6479	0.0015209	0.0235072
Zm00001d049096	-2.37709	1.98189	86.354	1.67e-06	0.000530723
MSTRG.8193	-2.37854	2.92337	43.14	4.26e-05	0.00322215
Zm00001d020691	-2.38631	5.61976	63.3865	7.35e-06	0.00121915
Zm00001d038371	-2.39781	4.36802	182.186	3.91e-08	5.73e-05
Zm00001d044374	-2.4022	2.64411	52.8799	1.7e-05	0.00191862
Zm00001d048669	-2.42521	6.35617	35.1053	0.000104224	0.00502961
Zm00001d038476	-2.43835	5.93227	31.2043	0.000170787	0.00659263
Zm00001d045423	-2.43869	2.51144	43.4642	4.12e-05	0.00320552
MSTRG.1952	-2.44096	2.3642	18.3433	0.00132656	0.021409
Zm00001d032664	-2.47683	3.01822	24.6303	0.000441841	0.0112936
Zm00001d022192	-2.47732	0.0467966	16.7948	0.00180753	0.0259006
Zm00001d014762	-2.48313	-0.42	14.104	0.00324294	0.0364058
Zm00001d005279	-2.50551	1.18081	28.105	0.000261847	0.00842305
Zm00001d049683	-2.50997	-0.995899	18.0122	0.00141515	0.0224577
Zm00001d044579	-2.52022	3.12663	26.3948	0.000336607	0.00963695
Zm00001d011406	-2.56332	0.964346	27.2368	0.000297021	0.00897452
Zm00001d040837	-2.56552	2.38465	20.241	0.000929005	0.0175248
Zm00001d020195	-2.58038	-0.201231	13.5753	0.00366675	0.0389892
Zm00001d021634	-2.58663	4.48408	59.0608	1.02e-05	0.00145823
ENSRNA049469775	-2.59613	2.01123	53.9734	1.55e-05	0.00182642
Zm00001d052792	-2.60136	5.38447	92.5974	1.19e-06	0.000410652
Zm00001d023117	-2.60415	1.81554	23.3003	0.00054756	0.0126356
Zm00001d021455	-2.6161	-0.779273	16.9273	0.00175904	0.0254371
Zm00001d029906	-2.62192	0.520199	36.7898	8.53e-05	0.00445546
MSTRG.14716	-2.62309	0.796928	57.6901	1.14e-05	0.00155601
Zm00001d003057	-2.63053	1.06878	18.6424	0.00125211	0.0206061
Zm00001d015876	-2.63546	-0.391262	13.5857	0.00365782	0.0389564
Zm00001d035243	-2.6538	3.03568	54.5111	1.48e-05	0.00176704
MSTRG.11321	-2.66457	-1.0194	15.7295	0.00226084	0.0295189
Zm00001d049113	-2.68041	4.54427	21.5481	0.000736451	0.0149461
Zm00001d053234	-2.71029	4.75855	20.4271	0.000898224	0.0171612
Zm00001d016031	-2.73053	3.94226	73.6591	3.6e-06	0.000792221
Zm00001d030233	-2.7335	-0.891857	21.6781	0.000720021	0.0148247
Zm00001d030791	-2.73499	-0.422544	14.0916	0.00325213	0.036427
Zm00001d044541	-2.74682	4.90659	13.5554	0.00368395	0.0390383
Zm00001d011903	-2.75254	0.572265	14.7002	0.00283288	0.0337849
Zm00001d035343	-2.77708	1.04023	27.7	0.000277604	0.00866799
Zm00001d047090	-2.77909	3.96399	27.455	0.00028768	0.00883341
Zm00001d025247	-2.78814	5.34669	95.3574	1.03e-06	0.000364324
Zm00001d011921	-2.80491	1.31246	26.1825	0.000347557	0.00981183
Zm00001d051223	-2.81082	2.16005	38.1826	7.27e-05	0.00415914
MSTRG.11501	-2.82638	2.16646	14.1954	0.0031757	0.0360874
Zm00001d004452	-2.82691	3.81771	62.8001	7.68e-06	0.00125161
Zm00001d009612	-2.82761	1.70984	68.7939	4.99e-06	0.000976429
MSTRG.9892	-2.83385	0.478626	12.6277	0.00460401	0.0448267
Zm00001d046834	-2.83497	0.729854	13.7994	0.00347951	0.0378966
MSTRG.514	-2.83876	5.18003	16.7594	0.00182073	0.0259014
Zm00001d030305	-2.85607	3.79318	38.5239	7e-05	0.00410126
Zm00001d001633	-2.86136	-1.19957	12.3995	0.00487068	0.0465136
Zm00001d003676	-2.86494	5.62948	84.5843	1.85e-06	0.000534781
Zm00001d017510	-2.87099	3.48102	71.9826	4.02e-06	0.000851432
Zm00001d027853	-2.88398	0.0281229	18.5608	0.00127192	0.0207991
MSTRG.2473	-2.89726	-0.866349	13.5481	0.00369028	0.0390383
Zm00001d010697	-2.91087	1.27573	41.1459	5.25e-05	0.00359516
Zm00001d032495	-2.9266	2.51164	15.4099	0.00242237	0.0305999
Zm00001d047705	-2.96532	1.91876	19.9212	0.000984859	0.0180974
Zm00001d007310	-2.96958	-0.052115	16.1377	0.00207272	0.0280569
Zm00001d001061	-2.97915	2.76049	32.2522	0.000148897	0.0061492
Zm00001d049625	-3.00279	-0.0253611	13.619	0.00362937	0.0388076
Zm00001d052684	-3.00739	5.39875	46.3239	3.1e-05	0.00271115
Zm00001d023450	-3.09004	5.81577	89.1245	1.43e-06	0.000470811
Zm00001d026679	-3.12929	-0.0922989	13.2425	0.00396744	0.0407252
Zm00001d021337	-3.13704	0.498671	14.9967	0.00265205	0.0324188
Zm00001d047096	-3.14814	6.02218	20.4361	0.000896764	0.0171564
Zm00001d025863	-3.16895	0.0115653	17.9249	0.00143968	0.0227178
Zm00001d004387	-3.19214	0.399126	30.8268	0.000179593	0.00679387
Zm00001d029903	-3.23366	-0.966863	31.5368	0.000163451	0.0064409
Zm00001d026537	-3.26687	0.446865	17.7425	0.00149254	0.0232673
Zm00001d048720	-3.31319	4.02787	66.3448	5.93e-06	0.00108689
Zm00001d000533	-3.34692	-0.91317	28.1242	0.000261126	0.00841895
Zm00001d004626	-3.38726	5.87973	85.5833	1.74e-06	0.000530723
Zm00001d023870	-3.41639	5.29229	106.24	6.02e-07	0.000262715
Zm00001d026298	-3.42561	-0.28789	15.5129	0.00236885	0.0302977
Zm00001d017494	-3.44555	1.9934	19.2139	0.00112323	0.0194914
Zm00001d047089	-3.47191	0.326467	48.4749	2.53e-05	0.0024509
Zm00001d023257	-3.47536	0.374552	32.8407	0.000138066	0.00592329
Zm00001d039697	-3.48152	-1.18377	15.1142	0.00258419	0.0318979
Zm00001d029318	-3.55363	-0.138128	15.0052	0.00264708	0.0323899
Zm00001d048719	-3.59916	1.47826	55.2288	1.4e-05	0.00170415
Zm00001d031428	-3.60815	2.92922	14.6115	0.00288982	0.0342254
Zm00001d021017	-3.62447	0.385101	36.7151	8.61e-05	0.00446452
MSTRG.4109	-3.6283	-0.876146	15.27	0.00249738	0.0312002
Zm00001d029776	-3.6312	0.952496	31.3612	0.000167278	0.00652819
Zm00001d041842	-3.64109	-0.13771	21.8954	0.000693524	0.0145537
Zm00001d014971	-3.70469	0.514564	28.5955	0.000244161	0.00821748
Zm00001d004309	-3.71237	0.589646	55.4828	1.37e-05	0.0016929
Zm00001d020887	-3.7704	2.46946	45.8288	3.26e-05	0.00278374
Zm00001d043047	-3.8235	6.81086	47.0659	2.89e-05	0.00263721
Zm00001d005742	-3.87629	1.47926	12.06	0.00530232	0.0490183
Zm00001d023872	-3.91903	-0.0244034	18.1521	0.00137687	0.022032
Zm00001d034357	-3.94042	-0.372309	12.931	0.00427586	0.0427677
Zm00001d020921	-3.94723	6.35285	27.1629	0.000300264	0.0090149
MSTRG.1237	-4.22756	-1.50092	12.525	0.00472182	0.0456137
Zm00001d038696	-4.38957	-0.478569	19.6672	0.00103209	0.0185468
MSTRG.926	-4.50082	-0.583907	24.0537	0.000484397	0.0118682
Zm00001d047358	-4.57467	0.87569	20.7366	0.000849685	0.0166142
Zm00001d015715	-4.86818	3.65344	39.2972	6.42e-05	0.00389945
MSTRG.1450	-5.30145	-1.27845	18.969	0.00117642	0.0199301
MSTRG.11986	-6.34053	-0.619998	27.0926	0.00030339	0.00908952
MSTRG.30671	-7.75188	6.33457	15.8507	0.00220292	0.0290856
MSTRG.8060	-8.36462	-0.553538	25.7249	0.000700003	0.0146254
Zm00001d029859	-9.0123	2.97695	98.5037	8.75e-07	0.000322538

## Sheet: Group VII
FileS1.7. Significant differentially upregulated genes in mop1-1 mutant ABA in comparison to Mop1 wildtype ABA (197 DEGs).
Gene_id_v4	log2FC	log2CPM	F	PValue	FDR
Zm00001d003118	11.5234	2.67619	715.702	8.61e-10	2.44e-05
Zm00001d012392	10.8444	1.6223	193.046	8.1e-07	0.000792528
Zm00001d003140	10.6193	1.71602	205.116	6.43e-07	0.000701946
MSTRG.1119	10.4829	1.37007	113.873	5.88e-06	0.00251296
MSTRG.3084	10.3832	1.74422	287.229	4.6e-08	0.000130375
MSTRG.23386	9.78889	0.729409	252.442	2.91e-07	0.00040992
MSTRG.10422	9.63484	0.391154	107.86	2.91e-06	0.00168697
MSTRG.15799	9.5558	0.794628	49.9563	0.000113756	0.0190976
MSTRG.29223	9.42566	0.628414	125.911	1.53e-06	0.00127895
Zm00001d002897	9.39988	1.29642	110.23	2.66e-06	0.0016791
MSTRG.10536	9.36954	0.629587	157.4	1.75e-06	0.00134476
Zm00001d003304	9.34079	6.99759	290.454	3.44e-09	3.46e-05
MSTRG.15841	9.25482	0.634845	45.3174	9.13e-05	0.0158894
Zm00001d006248	9.2465	-0.0205813	63.197	5e-05	0.010455
MSTRG.30626	9.13042	0.0231641	63.2598	2.52e-05	0.00643641
Zm00001d003332	9.01618	0.0615583	126.228	4.01e-06	0.00205159
MSTRG.3083	8.96142	2.76574	212.407	1.77e-08	7.34e-05
MSTRG.8500	8.91582	0.156046	119.715	4.89e-06	0.00227266
MSTRG.8348	8.86936	-0.178376	70.9414	3.31e-05	0.0078888
Zm00001d025140	8.68425	0.00364138	138.611	2.83e-06	0.00168697
MSTRG.1675	8.55653	-0.83183	49.665	0.000116076	0.0193725
MSTRG.7447	8.52679	-0.640038	63.1396	5.01e-05	0.010455
Zm00001d001823	8.52638	-0.150137	120.658	4.75e-06	0.00224411
MSTRG.7951	8.47842	2.59997	126.222	2.54e-07	0.000379306
MSTRG.8284	8.47105	0.00491247	57.0129	7.18e-05	0.0134059
Zm00001d051324	8.40536	-0.401688	98.4115	1.01e-05	0.00341209
MSTRG.6540	8.40122	-0.507803	96.4421	1.09e-05	0.00358148
MSTRG.14808	8.38926	-0.494765	98.2393	1.01e-05	0.00341209
MSTRG.11883	8.37027	-0.492438	53.1373	4.97e-05	0.010455
MSTRG.2303	8.36079	-0.566683	73.363	2.93e-05	0.00717458
MSTRG.26079	8.3203	-0.588673	60.6908	5.76e-05	0.0113569
MSTRG.30625	8.25219	-0.865394	55.0186	8.14e-05	0.0147013
MSTRG.30623	8.18057	-0.910216	59.3107	6.25e-05	0.0120248
MSTRG.8283	8.1539	-0.130432	53.4752	8.98e-05	0.0157338
MSTRG.7380	8.05951	-1.02398	60.8847	5.7e-05	0.0113569
MSTRG.11360	8.03566	-0.830108	54.5715	8.37e-05	0.0149359
MSTRG.7648	7.98293	0.989189	46.5928	4.89e-05	0.010455
Zm00001d053305	7.95784	-0.831972	77.0641	2.46e-05	0.00639401
MSTRG.20667	7.90975	-1.18599	39.2154	0.000259087	0.0335478
MSTRG.8746	7.89233	-0.408142	78.9784	2.25e-05	0.0061343
MSTRG.8125	7.88625	-1.14662	43.4367	0.000183612	0.0268528
MSTRG.1849	7.86941	-1.05234	34.718	0.000387856	0.0441938
Zm00001d023657	7.85737	0.558586	96.009	2.11e-06	0.00151051
Zm00001d030724	7.84559	-0.855141	61.1287	5.62e-05	0.0113569
MSTRG.11326	7.76937	-1.01502	54.6471	8.33e-05	0.0149359
Zm00001d003191	7.76608	4.36518	241.785	9e-09	5.11e-05
MSTRG.28914	7.74088	-0.851503	35.2227	0.000369899	0.0430114
Zm00001d000438	7.73382	-0.566238	39.872	0.000147324	0.0229663
MSTRG.29222	7.71047	-1.02339	64.6456	4.61e-05	0.0102977
MSTRG.2266	7.68453	-1.43099	37.1196	0.000311075	0.0385407
Zm00001d021562	7.64076	-0.611441	38.7748	0.000163313	0.0243869
MSTRG.14834	7.61511	-1.01618	37.2259	0.000308138	0.0383442
MSTRG.7555	7.60556	-1.16375	41.7302	0.000210274	0.0293887
MSTRG.11815	7.58677	1.82993	92.5055	2.5e-06	0.00161498
Zm00001d041458	7.58649	-1.64372	45.3756	0.000158261	0.023884
MSTRG.7625	7.46788	-0.377687	89.3169	1.44e-05	0.00453382
MSTRG.23582	7.39248	-1.39666	39.6057	0.000250643	0.0329224
MSTRG.11402	7.36279	-1.52197	39.0887	0.000261904	0.0336233
MSTRG.22428	7.23515	-1.47331	34.9051	0.000381074	0.0437726
MSTRG.16259	7.19981	-0.637807	50.8474	0.000107011	0.0181803
Zm00001d037249	7.11906	-0.944568	59.0517	6.35e-05	0.0120877
ENSRNA049475532	7.04759	-1.41159	36.2527	0.000336381	0.0397642
Zm00001d003186	6.97413	5.37739	177.501	4.47e-08	0.000130375
MSTRG.3925	6.70303	2.24905	54.9666	2.44e-05	0.00639401
Zm00001d034128	6.67826	-1.41904	36.118	0.000340541	0.0399249
Zm00001d033314	6.38877	2.49766	156.179	8.62e-08	0.000203766
MSTRG.20900	6.21466	-0.485706	36.962	0.000125319	0.020202
MSTRG.3882	6.08557	-0.714124	27.3957	0.000290182	0.0365913
MSTRG.24190	5.97001	0.875273	90.0313	2.82e-06	0.00168697
MSTRG.10421	5.74492	1.3688	71.8778	4.05e-06	0.00205159
MSTRG.17709	5.55965	0.0229282	28.1508	0.000260134	0.0335478
Zm00001d029222	5.34108	-0.34203	26.4354	0.000334563	0.0397642
MSTRG.29240	5.11465	-0.330509	31.6943	0.000228997	0.031236
MSTRG.15778	5.048	-0.637736	31.9657	0.000154533	0.023884
MSTRG.27876	4.77343	-0.144688	25.1009	0.00041036	0.0463854
MSTRG.28584	4.68699	0.705536	30.3796	0.000190731	0.0272298
MSTRG.29221	4.46112	-0.285021	32.913	0.0001368	0.0216188
Zm00001d038019	4.30523	1.78602	85.9061	1.71e-06	0.00134476
MSTRG.30190	4.27238	0.912147	33.3706	0.000129103	0.0206943
MSTRG.16260	4.26332	0.611795	26.5721	0.000327775	0.0395729
MSTRG.7871	4.22343	0.141611	29.8503	0.00020499	0.028792
Zm00001d022303	4.19486	-0.859886	27.4057	0.000289757	0.0365913
MSTRG.8347	4.18139	3.12082	136.103	1.74e-07	0.000289679
MSTRG.15860	4.04414	2.55255	133.473	1.92e-07	0.000301988
Zm00001d047900	4.04038	5.15826	146.66	1.19e-07	0.000224656
MSTRG.11564	4.02595	2.59484	62.1053	8.09e-06	0.00310068
MSTRG.7777	3.8507	0.114703	26.4439	0.000334134	0.0397642
MSTRG.5649	3.71387	1.36455	77.2043	2.87e-06	0.00168697
Zm00001d002979	3.69712	2.58455	82.0679	2.14e-06	0.00151051
MSTRG.5341	3.65329	0.201745	40.3636	5.71e-05	0.0113569
Zm00001d018118	3.64884	1.18452	50.8093	2.05e-05	0.00592059
Zm00001d047647	3.63556	1.22191	30.879	0.000178344	0.0262175
Zm00001d030812	3.62986	3.89302	54.0927	1.54e-05	0.00468519
Zm00001d002899	3.59402	6.01575	153.204	9.51e-08	0.000207505
MSTRG.24405	3.56667	-0.33226	32.5094	0.000144043	0.022579
MSTRG.8531	3.52039	0.409725	59.6465	9.77e-06	0.00337985
MSTRG.23321	3.51521	1.46438	34.9632	0.000106035	0.018123
Zm00001d002952	3.45921	1.87472	73.8857	6.79e-06	0.00271465
MSTRG.17708	3.40315	3.89104	47.0342	2.9e-05	0.00715353
Zm00001d006503	3.38316	0.64441	44.5145	3.71e-05	0.00862558
Zm00001d012387	3.35818	3.6723	169.273	5.71e-08	0.000147171
Zm00001d033082	3.30825	0.471412	49.5765	2.29e-05	0.00617806
MSTRG.20529	3.28814	3.82935	86.8443	1.62e-06	0.00131689
Zm00001d007287	3.27101	3.44513	138.889	1.57e-07	0.000277743
Zm00001d003411	3.25681	4.45571	114.694	4.11e-07	0.000485699
Zm00001d035222	3.22922	4.58471	121.532	3.07e-07	0.00040992
MSTRG.14786	3.21895	4.64405	49.1112	2.39e-05	0.0063271
Zm00001d045321	3.19447	5.51173	38.813	6.77e-05	0.0128116
MSTRG.14903	3.17314	1.70236	65.47	6.31e-06	0.0026325
MSTRG.2542	3.1705	3.9362	84.7885	1.83e-06	0.00136308
Zm00001d025803	3.16579	4.00851	60.8308	8.91e-06	0.00327174
MSTRG.8938	3.14184	0.298911	28.7911	0.000237506	0.0320882
MSTRG.20431	3.13655	0.768242	33.2594	0.000130925	0.0208685
MSTRG.1701	3.1031	2.35789	96.1087	9.88e-07	0.000904551
Zm00001d003059	3.0946	3.41777	68.5683	5.07e-06	0.00228891
MSTRG.8295	3.02909	1.65728	47.9543	2.66e-05	0.00667227
Zm00001d003003	3.01868	2.81398	64.8502	6.6e-06	0.0026886
MSTRG.1897	3.01286	0.122845	31.6688	0.000160643	0.0241151
MSTRG.11958	2.8505	1.85474	53.4712	1.62e-05	0.00488797
MSTRG.7802	2.84111	0.880081	64.7789	6.63e-06	0.0026886
MSTRG.23279	2.79619	2.94162	44.8122	3.6e-05	0.00844248
MSTRG.24345	2.74419	2.84814	36.6953	8.63e-05	0.0152983
MSTRG.28140	2.67223	0.49745	41.6937	4.95e-05	0.010455
MSTRG.1633	2.66595	1.40597	61.894	8.22e-06	0.00310859
Zm00001d012413	2.62756	1.87383	73.9235	3.54e-06	0.00186023
MSTRG.14063	2.62631	3.12344	30.3326	0.000191948	0.0272298
Zm00001d032511	2.6241	0.785067	56.1723	1.29e-05	0.00411443
Zm00001d021208	2.62074	3.25643	41.8317	4.88e-05	0.010455
Zm00001d002904	2.60793	0.352252	36.6079	8.72e-05	0.0153595
MSTRG.23439	2.58809	3.62012	41.6172	4.99e-05	0.010455
MSTRG.23278	2.57622	1.78094	25.0371	0.000414471	0.0464798
Zm00001d003142	2.5543	0.510055	35.8867	9.49e-05	0.0164178
MSTRG.24582	2.49696	0.977509	75.7901	3.14e-06	0.00174746
MSTRG.14886	2.48935	2.45806	120.719	3.18e-07	0.00040992
MSTRG.8180	2.47932	0.299273	26.8324	0.000315301	0.0388579
MSTRG.23277	2.46909	2.52411	59.6776	9.74e-06	0.00337985
MSTRG.2664	2.43339	1.71509	27.6377	0.000280122	0.0356396
MSTRG.28907	2.42551	0.570262	45.1043	3.5e-05	0.00826984
MSTRG.28906	2.41872	2.12979	50.5658	2.09e-05	0.00593038
MSTRG.18612	2.39459	1.38622	29.4794	0.000215737	0.0300043
Zm00001d029501	2.38667	1.15204	31.1485	0.000172055	0.0254248
MSTRG.23148	2.35528	1.45438	39.5054	6.27e-05	0.0120248
Zm00001d003088	2.35004	3.62506	48.6985	2.48e-05	0.00639401
MSTRG.5024	2.34167	1.73003	81.7257	2.18e-06	0.00151051
Zm00001d003167	2.32292	1.77824	91.6637	1.25e-06	0.00110594
MSTRG.11959	2.25749	2.85156	74.9081	3.32e-06	0.00177878
MSTRG.25243	2.20638	1.01693	70.7339	4.37e-06	0.00213844
Zm00001d048434	2.17316	1.9564	26.6964	0.000321748	0.0390113
MSTRG.11272	2.16532	2.98769	43.5031	4.11e-05	0.00947475
MSTRG.14064	2.08599	0.693843	34.5297	0.000111793	0.0188797
MSTRG.28427	2.06761	1.89567	59.0677	1.02e-05	0.00341209
MSTRG.1583	1.92284	2.5449	75.2977	3.24e-06	0.00176838
Zm00001d001850	1.90167	1.07053	31.7923	0.000158068	0.023884
MSTRG.30531	1.88429	1.41498	33.9869	0.000119533	0.0198326
MSTRG.11619	1.87941	2.29512	51.8334	1.87e-05	0.00551845
Zm00001d002836	1.87673	3.5756	51.0985	1.99e-05	0.00582902
Zm00001d021665	1.8579	3.16505	33.8509	0.00012157	0.0199135
Zm00001d023828	1.82963	2.91644	70.7541	4.37e-06	0.00213844
MSTRG.30532	1.81807	3.15865	62.5339	7.83e-06	0.00308563
Zm00001d040075	1.81036	4.35279	32.8926	0.000137156	0.0216188
MSTRG.5347	1.80427	2.50155	42.672	4.47e-05	0.0101536
Zm00001d033148	1.78654	3.11645	50.2721	2.15e-05	0.00601873
Zm00001d016291	1.76635	1.63041	50.6102	2.08e-05	0.00593038
Zm00001d009610	1.74814	1.66881	66.3247	5.93e-06	0.00251296
MSTRG.23462	1.74663	2.24011	28.3564	0.0002526	0.0330266
Zm00001d024324	1.70023	4.71974	28.6785	0.00024131	0.0324476
Zm00001d005766	1.66883	4.42223	26.8095	0.000316375	0.0388579
Zm00001d021459	1.64723	1.37099	26.0847	0.000352745	0.0411855
Zm00001d013208	1.62677	3.68556	79.4367	2.5e-06	0.00161498
Zm00001d039956	1.59234	4.58569	58.1639	1.1e-05	0.00358148
MSTRG.12268	1.51663	3.72576	40.6265	5.55e-05	0.0113316
Zm00001d003017	1.50604	2.61271	25.0732	0.000412137	0.0464014
Zm00001d047882	1.48353	4.4199	100.338	7.99e-07	0.000792528
MSTRG.20432	1.47269	3.29052	29.3074	0.000220947	0.0304306
Zm00001d001774	1.46051	3.65905	40.8704	5.41e-05	0.0111998
Zm00001d017068	1.4581	0.553083	26.7468	0.00031934	0.0389589
MSTRG.12071	1.45787	1.82781	39.5496	6.24e-05	0.0120248
Zm00001d004446	1.44545	2.86872	29.4274	0.000217297	0.0300739
Zm00001d022926	1.42291	2.64126	50.0747	2.19e-05	0.00601873
MSTRG.20564	1.37909	3.17924	25.522	0.00038443	0.04398
Zm00001d003148	1.37613	3.83701	40.0657	5.9e-05	0.011543
Zm00001d033482	1.36317	2.9362	28.5978	0.000244084	0.0325395
Zm00001d001248	1.28998	1.56805	33.8143	0.000122126	0.0199135
Zm00001d051088	1.25062	3.15	31.8795	0.000156278	0.023884
Zm00001d004620	1.20553	4.44641	35.0092	0.000105445	0.018123
Zm00001d012702	1.19301	4.45625	46.6772	3e-05	0.00727599
Zm00001d015870	1.10258	1.61266	26.4049	0.000336095	0.0397642
Zm00001d012091	1.04476	3.44509	25.6919	0.000374517	0.0431943
Zm00001d000974	1.03553	5.22754	28.4751	0.00024837	0.0327756
Zm00001d020137	1.01643	5.65248	38.0355	7.39e-05	0.0137099
Zm00001d003058	1.01328	3.82845	26.4026	0.000336211	0.0397642
Zm00001d027329	0.999463	3.81535	40.3031	5.75e-05	0.0113569
Zm00001d003395	0.972627	5.8606	37.3822	7.97e-05	0.0144892
Zm00001d004843	0.969937	6.99372	24.7495	0.000433602	0.0482438
Zm00001d024715	0.92218	4.59944	54.3689	1.5e-05	0.00462652
Zm00001d049324	0.916001	2.83034	26.7342	0.000319943	0.0389589
Zm00001d023479	0.827454	4.01191	25.6976	0.000374193	0.0431943

## Sheet: Group VIII
FileS1.8. Significant differentially downregulated genes in mop1-1 mutant ABA in comparison to Mop1 wildtype ABA (59 DEGs).
Gene_id_v4	log2FC	log2CPM	F	PValue	FDR
Zm00001d003193	-0.889337	4.31721	30.2067	0.000195256	0.0275612
Zm00001d003245	-0.965766	4.95375	46.4937	3.05e-05	0.00734294
Zm00001d003352	-1.0059	3.97815	60.8441	8.9e-06	0.00327174
Zm00001d019430	-1.04151	1.59556	24.6352	0.000441494	0.04893
Zm00001d003161	-1.07097	3.3155	31.9416	0.000155019	0.023884
Zm00001d003268	-1.09185	3.7765	52.4462	1.77e-05	0.00528492
MSTRG.7766	-1.10773	3.58898	28.9305	0.000232894	0.0316157
Zm00001d020603	-1.10841	2.08712	25.4001	0.000391729	0.0444565
Zm00001d014984	-1.2208	4.88555	69.6681	4.7e-06	0.00224411
Zm00001d003196	-1.26621	2.04954	30.3422	0.000191699	0.0272298
Zm00001d005790	-1.27606	4.62283	59.9222	9.56e-06	0.00337985
Zm00001d021119	-1.31744	6.9316	50.0978	2.18e-05	0.00601873
Zm00001d044267	-1.33585	3.48898	48.2979	2.57e-05	0.00651852
Zm00001d035981	-1.3535	5.57901	26.999	0.000307613	0.0383442
Zm00001d018924	-1.38193	3.13566	33.8349	0.000121812	0.0199135
Zm00001d007491	-1.4299	1.66786	31.8276	0.000157341	0.023884
Zm00001d003151	-1.45011	2.74925	56.9445	1.21e-05	0.00390647
Zm00001d002773	-1.45262	2.07644	38.6699	6.88e-05	0.0129321
Zm00001d042777	-1.46947	3.81781	37.7544	7.63e-05	0.0139733
Zm00001d035987	-1.49022	2.95591	42.0519	4.77e-05	0.010455
Zm00001d016844	-1.64185	2.45407	28.5588	0.000245434	0.0325395
Zm00001d003399	-1.68364	4.73629	42.9339	4.35e-05	0.00996253
Zm00001d002820	-1.69394	1.89716	26.3719	0.000337769	0.0397642
Zm00001d014089	-1.70744	0.862211	30.4817	0.000188117	0.0271599
Zm00001d002993	-1.73927	4.77705	49.3148	2.34e-05	0.00626832
Zm00001d002772	-1.74932	4.20896	66.6635	5.79e-06	0.00251296
MSTRG.8943	-1.76009	1.41658	42.2869	4.66e-05	0.0103203
Zm00001d003155	-1.77841	3.53786	97.5413	9.19e-07	0.00086895
Zm00001d000791	-1.81241	1.46515	30.4634	0.000188584	0.0271599
Zm00001d017510	-1.85019	3.48102	31.3712	0.000167057	0.0248155
Zm00001d028630	-1.96696	4.65966	29.1495	0.000225862	0.0309573
Zm00001d003102	-1.97677	1.84974	75.8925	3.12e-06	0.00174746
MSTRG.7783	-2.01883	1.93952	27.1407	0.000301251	0.0378189
Zm00001d003378	-2.1227	4.04456	211.394	1.81e-08	7.34e-05
Zm00001d039139	-2.14442	1.51479	30.4943	0.000187799	0.0271599
MSTRG.22196	-2.22732	1.19157	28.5654	0.000245204	0.0325395
MSTRG.7674	-2.25028	-0.306367	27.6992	0.000277636	0.0354824
Zm00001d002849	-2.27236	1.10832	42.5715	4.52e-05	0.0101785
Zm00001d003317	-2.30257	4.1347	37.7695	7.62e-05	0.0139733
Zm00001d003261	-2.40978	2.50165	62.1502	8.06e-06	0.00310068
Zm00001d003381	-2.42697	5.30278	112.208	4.58e-07	0.000520225
Zm00001d002843	-2.62094	0.0532045	28.2371	0.000256938	0.0334397
Zm00001d052827	-2.96146	2.01365	54.5	1.48e-05	0.00462583
ENSRNA049469775	-3.21814	2.01123	81.1702	2.26e-06	0.0015241
ENSRNA049469740	-3.34221	2.64786	33.6852	0.000124108	0.0201211
Zm00001d003114	-4.16881	1.72264	60.5953	9.07e-06	0.00327174
Zm00001d003086	-4.71206	1.01408	88.3902	1.49e-06	0.00127895
MSTRG.7542	-5.93542	0.793654	40.728	5.49e-05	0.0112898
Zm00001d003264	-6.04282	-0.637145	24.8919	0.000423998	0.0473609
Zm00001d003267	-8.50295	2.43194	177.893	3.58e-07	0.000441237
MSTRG.7556	-8.67252	-0.535299	95.6083	2.79e-05	0.00695426
MSTRG.7672	-8.77178	0.00784935	134.811	9.11e-06	0.00327174
MSTRG.7714	-9.4648	0.709841	160.883	5.08e-06	0.00228891
Zm00001d003306	-10.1034	5.96595	264.193	5.66e-09	4.02e-05
Zm00001d003312	-10.2177	0.959956	147.812	7.83e-07	0.000792528
MSTRG.7570	-10.2906	3.64624	287.087	3.66e-09	3.46e-05
MSTRG.7781	-10.9241	1.57021	156.271	5.6e-06	0.00248087
Zm00001d003128	-11.6201	2.47953	667.276	4.21e-08	0.000130375
MSTRG.7573	-11.6268	2.55684	498.389	1.14e-07	0.000224656
